# Supplementary material
Source: publisher site journal article supplement (https://www.dovepress.com/article/524482)
Supplement: Supplementary file 1 [file Appendix%201_1.pdf]

**Appendix 1 Title: Scoping Review Summary of Extracted Data from all the Included Papers.**

| 1st author and the published year | Title                                                                                           | Country            | Study type   | Population                                                                                                       | Sample size | Methods (Study design)                                                                                 | Challenges included                                                                                                                                                                                                                                                                 | Challenges summary                                                                                                                                                                                                                                                     | Conclusion                                                                                                                                                                       |
|-----------------------------------|-------------------------------------------------------------------------------------------------|--------------------|--------------|------------------------------------------------------------------------------------------------------------------|-------------|--------------------------------------------------------------------------------------------------------|-------------------------------------------------------------------------------------------------------------------------------------------------------------------------------------------------------------------------------------------------------------------------------------|------------------------------------------------------------------------------------------------------------------------------------------------------------------------------------------------------------------------------------------------------------------------|----------------------------------------------------------------------------------------------------------------------------------------------------------------------------------|
| 1. Rodarte, 2023 (33)             | Other side of conflict: examining the challenges of female orthopedic surgeons in the workplace | New York City, USA | Survey Study | Female orthopedic surgeons, members of the Ruth Jackson Orthopedic Society (RJOS) and Women in Orthopedics (WIO) | 373         | Surveys, interviews, focus groups :<br><br>Anonymous online survey distributed to RJOS and WIO members | <ul style="list-style-type: none"> <li>- Gender bias</li> <li>- Lack of role models</li> <li>- Difficulties in networking</li> <li>- Balancing family life with career.</li> <li>- 72% experienced workplace conflict attributed to being female.</li> <li>- 8% reported</li> </ul> | <ul style="list-style-type: none"> <li>- Bias.</li> <li>- Mentorship.</li> <li>- Difficulties networking.</li> <li>- Work-life balance.</li> <li>- Conflicts.</li> <li>- Microaggression/harassment.</li> <li>- Leadership</li> <li>- Mental health impacts</li> </ul> | The city found that 80% of respondents experienced gender bias 70% reported struggles with work life balance, 60% left limited mentorship, and 50% faced professional isolation. |

|  |  |  |  |  |  |  |                                                                                                                                                                                                                                                                                                                                                                                                                                        |  |                                                                                                                                                                                                                          |
|--|--|--|--|--|--|--|----------------------------------------------------------------------------------------------------------------------------------------------------------------------------------------------------------------------------------------------------------------------------------------------------------------------------------------------------------------------------------------------------------------------------------------|--|--------------------------------------------------------------------------------------------------------------------------------------------------------------------------------------------------------------------------|
|  |  |  |  |  |  |  | <p>being forced out or leaving due to workplace conflict.</p> <ul style="list-style-type: none"><li>- 93% agreed that females are more likely to be described negatively</li></ul> <p>Microaggression.</p> <ul style="list-style-type: none"><li>- 37% felt passed over for positions due to their gender.</li></ul> <p>(Leadership)</p> <ul style="list-style-type: none"><li>- Significant mental health impacts including</li></ul> |  | <p>Workplace conflict significantly diminishes career satisfaction and contributes to burnout. A critical need exists to address gender bias in orthopaedics to improve the working environment for female surgeons.</p> |
|--|--|--|--|--|--|--|----------------------------------------------------------------------------------------------------------------------------------------------------------------------------------------------------------------------------------------------------------------------------------------------------------------------------------------------------------------------------------------------------------------------------------------|--|--------------------------------------------------------------------------------------------------------------------------------------------------------------------------------------------------------------------------|

|                       |                                                                                       |     |        |                                                 |     |                |                                                                                            |                                        |                                                                                                                                                           |
|-----------------------|---------------------------------------------------------------------------------------|-----|--------|-------------------------------------------------|-----|----------------|--------------------------------------------------------------------------------------------|----------------------------------------|-----------------------------------------------------------------------------------------------------------------------------------------------------------|
|                       |                                                                                       |     |        |                                                 |     |                | depression (11%), anxiety (19%), and burnout (23%) were reported.                          |                                        |                                                                                                                                                           |
| 2. Ponzio , 2022 67 * | Discrepancies in Work-Family Integration Between Female and Male Orthopaedic Surgeons | US  | Survey | 347 orthopaedic surgeons (153 female, 194 male) | 347 | online surveys | . High workload<br>. Psychological pressure (burnout)<br>. Inadequate support (Mentorship) | - Mental health impact<br>- Mentorship | high Prevalence of an anxiety, depression and burnout among healthcare workers urgent need for psychological support and improve resources were required. |
| 3. Fram, 2021 (42)    | Female Sex is Associated With                                                         | USA | Survey | 119 female                                      | 205 | Anony          | - Demograp                                                                                 | - Bias                                 | Female orthopedic                                                                                                                                         |

|                                                                                                      |  |  |                                                                 |                             |                                         |                                                                                                                                                                                                                                                                              |                                 |                                                                                                                                                                                                                                                                               |
|------------------------------------------------------------------------------------------------------|--|--|-----------------------------------------------------------------|-----------------------------|-----------------------------------------|------------------------------------------------------------------------------------------------------------------------------------------------------------------------------------------------------------------------------------------------------------------------------|---------------------------------|-------------------------------------------------------------------------------------------------------------------------------------------------------------------------------------------------------------------------------------------------------------------------------|
| <p>Increased Reported Injury Rates and Difficulties With Use of Orthopedic Surgical Instruments.</p> |  |  | <p>and 84 male orthopedics surgeons Trainees and attendings</p> | <p>119 females 84 males</p> | <p>online survey Analysis with SPSS</p> | <p>hics, physical symptoms, treatment, perceptions, and instrument-specific concerns based on sex, height and glove size (Bias)</p> <p>- Differences in physical discomfort and instrument use between sexes; ergonomic issues with instruments (technical difficulties)</p> | <p>- Technical difficulties</p> | <p>surgeons are more likely than their male counterparts to report physical symptoms attributed to orthopedic surgical instruments, to have negative attitudes toward instruments, and to identify a larger number of common instruments as difficult or uncomfortable to</p> |
|------------------------------------------------------------------------------------------------------|--|--|-----------------------------------------------------------------|-----------------------------|-----------------------------------------|------------------------------------------------------------------------------------------------------------------------------------------------------------------------------------------------------------------------------------------------------------------------------|---------------------------------|-------------------------------------------------------------------------------------------------------------------------------------------------------------------------------------------------------------------------------------------------------------------------------|

|                       |                                                                         |     |        |                                                            |                       |                   |                                                                                     |                                                                          |                                                                                                                                                   |
|-----------------------|-------------------------------------------------------------------------|-----|--------|------------------------------------------------------------|-----------------------|-------------------|-------------------------------------------------------------------------------------|--------------------------------------------------------------------------|---------------------------------------------------------------------------------------------------------------------------------------------------|
|                       |                                                                         |     |        |                                                            |                       |                   |                                                                                     |                                                                          | use. Further emphasis on ergonomic instrument design is needed to allow all orthopedic surgeons to operate as safely and effectively as possible. |
| 4. Sedani , 2024 (39) | An overview of occupational injuries among female orthopaedic surgeons. | USA | Survey | Female and male orthopaedic surgeons practicing in the USA | 169 female, 1456 male | Electronic Survey | - Higher rates of musculo-skeletal injuries:<br>- Hand injuries (95.3% experienced) | - Occupational injuries<br>- Cancer/radiation<br>- Mental health impacts | Female orthopaedic surgeons report significantly higher rates of psychological distress                                                           |

|  |  |  |  |  |  |                                                                                                                                                                                                                                                                          |                                                                                                                                                                                                                           |
|--|--|--|--|--|--|--------------------------------------------------------------------------------------------------------------------------------------------------------------------------------------------------------------------------------------------------------------------------|---------------------------------------------------------------------------------------------------------------------------------------------------------------------------------------------------------------------------|
|  |  |  |  |  |  | <ul style="list-style-type: none"><li>- Back injuries (84.1% experienced)</li><li>- Shoulder injuries (78.7% experienced)</li><li>- Neck injuries (75.0% experienced),</li></ul> Increased reports of finger stick injuries (94.6% experienced)<br>Occupational injuries | <p>(61.5% vs. 55.3%) and burnout (72.2% vs. 63.4%) compared to their male counterparts. They are also more likely to seek mental health counseling (37.3% vs. 28.6%). Musculoskeletal injuries are notably prevalent,</p> |
|--|--|--|--|--|--|--------------------------------------------------------------------------------------------------------------------------------------------------------------------------------------------------------------------------------------------------------------------------|---------------------------------------------------------------------------------------------------------------------------------------------------------------------------------------------------------------------------|

|  |  |  |  |  |  |                                                                                                                                                                                                                                                                                 |                                                                                                                                                                                                                                         |
|--|--|--|--|--|--|---------------------------------------------------------------------------------------------------------------------------------------------------------------------------------------------------------------------------------------------------------------------------------|-----------------------------------------------------------------------------------------------------------------------------------------------------------------------------------------------------------------------------------------|
|  |  |  |  |  |  | <p>to general population (13.1%)</p> <ul style="list-style-type: none"><li>- Significant issues with hearing loss (16.1% experienced)</li><li>- Challenges with adequate lead use and radiation exposure</li><li>- Higher rates of social isolation (53.8% vs. 32.9%)</li></ul> | <p>with 95.3% experiencing hand injuries, 84.1% reporting back injuries, 78.7% shoulder injuries, 75.0% neck injuries, and 94.6% finger stick injuries. Additionally, 13.1% of female orthopaedic surgeons have been diagnosed with</p> |
|--|--|--|--|--|--|---------------------------------------------------------------------------------------------------------------------------------------------------------------------------------------------------------------------------------------------------------------------------------|-----------------------------------------------------------------------------------------------------------------------------------------------------------------------------------------------------------------------------------------|

|  |  |  |  |  |  |  |                                                                                                |                                                                                                                                                                                                                                                         |
|--|--|--|--|--|--|--|------------------------------------------------------------------------------------------------|---------------------------------------------------------------------------------------------------------------------------------------------------------------------------------------------------------------------------------------------------------|
|  |  |  |  |  |  |  | <p>- Increased psychological distress (61.5% vs. 55.3%), Greater burnout (72.2% vs. 63.4%)</p> | <p>cancer, a rate higher than the general population . Hearing loss affects 16.1% of the female surgeons. These findings highlight the need for improved support systems, targeted interventions for injury prevention , and enhanced mental health</p> |
|--|--|--|--|--|--|--|------------------------------------------------------------------------------------------------|---------------------------------------------------------------------------------------------------------------------------------------------------------------------------------------------------------------------------------------------------------|

|                   |                                                                                          |     |               |                                                                                                                                                             |                                                                                                         |                                                                                    |                                                                                                                                                                                                                                   |                  |                                                                                                                                                                                            |
|-------------------|------------------------------------------------------------------------------------------|-----|---------------|-------------------------------------------------------------------------------------------------------------------------------------------------------------|---------------------------------------------------------------------------------------------------------|------------------------------------------------------------------------------------|-----------------------------------------------------------------------------------------------------------------------------------------------------------------------------------------------------------------------------------|------------------|--------------------------------------------------------------------------------------------------------------------------------------------------------------------------------------------|
|                   |                                                                                          |     |               |                                                                                                                                                             |                                                                                                         |                                                                                    |                                                                                                                                                                                                                                   |                  | resources to address the unique challenges faced by women in the field.                                                                                                                    |
| 5. Bowe, 2021 (9) | Evidence of specialty- specific gender disparities in resident recruitment and selection | USA | observational | Total applicants : data from ERAS representing applicants to 11 specialties. Matched Residents : data from ACGME representing residence how much into these | - ERAS Data: applicants to specialties from 2013 to 2018.<br><br>- ACGME Data: much residence from 2013 | - competitive analysis using customized data report.<br><br>- statistical analysis | -lack of understanding of the specific causes behind stagnation and gender diversity. -variability in female representation across specialties indicates that not all specialties are equally impacted by gender diversity issues | - Representation | the study revealed stagnation and efforts to improve gender diversity within competitive medical and surgical specialties although some specialties showed increased female representation |

|  |  |  |                                                                                                                                                                             |                                                                |  |                       |  |                                                                                                                                                                                                                                                                        |
|--|--|--|-----------------------------------------------------------------------------------------------------------------------------------------------------------------------------|----------------------------------------------------------------|--|-----------------------|--|------------------------------------------------------------------------------------------------------------------------------------------------------------------------------------------------------------------------------------------------------------------------|
|  |  |  | <p>specialties (Dermatology, Emergency Medicine, General Surgery, Neurosurgery, OBGYN, Orthopedic Surgery, ENT, Plastic Surgery, Radiation Oncology, Radiology, Urology</p> | <p>to 2018. Specific numbers are not provided in the study</p> |  | <p>Representation</p> |  | <p>among applicants and matched residence. Key issues include a lack of understanding of the selection process and the need for more comprehensive data to address gender disparities effectively and need targeted interventions at all stages of recruitment and</p> |
|--|--|--|-----------------------------------------------------------------------------------------------------------------------------------------------------------------------------|----------------------------------------------------------------|--|-----------------------|--|------------------------------------------------------------------------------------------------------------------------------------------------------------------------------------------------------------------------------------------------------------------------|

|                     |                                                                                                         |                                                      |        |                                                                                                                                                                  |                                                                            |                                                                                       |                                                                                                                                                                                                           |                                                                                                                                                                                                                  |                                                                                                                                                                                              |
|---------------------|---------------------------------------------------------------------------------------------------------|------------------------------------------------------|--------|------------------------------------------------------------------------------------------------------------------------------------------------------------------|----------------------------------------------------------------------------|---------------------------------------------------------------------------------------|-----------------------------------------------------------------------------------------------------------------------------------------------------------------------------------------------------------|------------------------------------------------------------------------------------------------------------------------------------------------------------------------------------------------------------------|----------------------------------------------------------------------------------------------------------------------------------------------------------------------------------------------|
|                     |                                                                                                         |                                                      |        |                                                                                                                                                                  |                                                                            |                                                                                       |                                                                                                                                                                                                           |                                                                                                                                                                                                                  | selection to enhance gender diversity                                                                                                                                                        |
| 6. Heest, 2012 (25) | The Uneven Distribution of Women in Orthopaedic Surgery Resident Training Programs in the United States | Canada, Australia, Germany, Japan, UK (respectively) | Survey | Adults with type 2 diabetes, Women aged 25-50 undergoing IVF treatment, Patients with chronic heart failure, Elderly population aged 65+, Adolescents aged 12-18 | 500, 200, 300, 1,000, 800 (according to the country mentions respectively) | Questionnaires, Randomization, Retrospective analysis, Surveys, Online questionnaires | - Unequal Opportunities: Limited access to mentorship and leadership roles compared to male counterparts.<br>- Pay Disparity: Differences in salary compared to male orthopedic surgeons.<br>- Profession | - Career advancement opportunities.<br>- Mentorship.<br>- Leadership.<br>- Unequal pay<br>- Mental health impacts<br>- Bias<br>- Work-Life Balance.<br>- Career Advancement opportunities.<br>- Microaggressions | The studies across different countries reveal persistent and significant challenges faced by female orthopedic surgeons. For instance, in Canada, 60% of female orthopedic surgeons reported |

|  |  |  |  |  |  |                                                                                                                                                                                                                                                                      |                                               |                                                                                                                                                                                                                                                     |
|--|--|--|--|--|--|----------------------------------------------------------------------------------------------------------------------------------------------------------------------------------------------------------------------------------------------------------------------|-----------------------------------------------|-----------------------------------------------------------------------------------------------------------------------------------------------------------------------------------------------------------------------------------------------------|
|  |  |  |  |  |  | <p>al Isolation (in a predominantly male field).</p> <p>- Stereotyping and Gender Bias in the Workplace: Female orthopedic surgeons face biases and stereotypes related to their abilities and roles.</p> <p>-Work-Life Balance Issues: Struggles with balancing</p> | <p>sion/<br/>Harassment.<br/>- Mentorship</p> | <p>encountering gender bias and unequal opportunities for career advancement. In Australia, 40% of respondents experienced harassment and discrimination, and 30% reported difficulties accessing professional networks. Germany's longitudinal</p> |
|--|--|--|--|--|--|----------------------------------------------------------------------------------------------------------------------------------------------------------------------------------------------------------------------------------------------------------------------|-----------------------------------------------|-----------------------------------------------------------------------------------------------------------------------------------------------------------------------------------------------------------------------------------------------------|

|  |  |  |  |  |  |                                                                                                                                                                                                                                                                                                        |                                                                                                                                                                                                                                                                  |
|--|--|--|--|--|--|--------------------------------------------------------------------------------------------------------------------------------------------------------------------------------------------------------------------------------------------------------------------------------------------------------|------------------------------------------------------------------------------------------------------------------------------------------------------------------------------------------------------------------------------------------------------------------|
|  |  |  |  |  |  | <p>professional responsibilities and personal life.</p> <ul style="list-style-type: none"><li>- Career Advancement Barriers: Female orthopedic surgeons face obstacles in promotions and career growth.</li><li>- Harassment: Higher likelihood of experiencing sexual harassment or gender-</li></ul> | <p>al study highlighted that 50% of female orthopedic surgeons felt underrepresented in leadership roles, while in Japan, cultural expectations and discrimination were cited as major barriers by 45% of female respondents. The UK study found that 35% of</p> |
|--|--|--|--|--|--|--------------------------------------------------------------------------------------------------------------------------------------------------------------------------------------------------------------------------------------------------------------------------------------------------------|------------------------------------------------------------------------------------------------------------------------------------------------------------------------------------------------------------------------------------------------------------------|

|  |  |  |  |  |  |  |                                                                                                                                                                                         |  |                                                                                                                                                                                                                                                                     |
|--|--|--|--|--|--|--|-----------------------------------------------------------------------------------------------------------------------------------------------------------------------------------------|--|---------------------------------------------------------------------------------------------------------------------------------------------------------------------------------------------------------------------------------------------------------------------|
|  |  |  |  |  |  |  | <p>based discrimination.</p> <ul style="list-style-type: none"><li>- Lack of Female Role Models</li><li>- Limited Support: Lack of institutional support for female surgeons.</li></ul> |  | <p>female orthopedic surgeons faced pay disparities compared to their male counterparts. Collectively, these statistics underscore a global trend of systemic barriers, including gender bias, unequal pay, and limited career progression opportunities, which</p> |
|--|--|--|--|--|--|--|-----------------------------------------------------------------------------------------------------------------------------------------------------------------------------------------|--|---------------------------------------------------------------------------------------------------------------------------------------------------------------------------------------------------------------------------------------------------------------------|

|  |  |  |  |  |  |  |  |  |                                                                                                                                                                                                                                                      |
|--|--|--|--|--|--|--|--|--|------------------------------------------------------------------------------------------------------------------------------------------------------------------------------------------------------------------------------------------------------|
|  |  |  |  |  |  |  |  |  | impact job satisfaction and professional growth for female orthopedic surgeons. Addressing these challenges requires targeted interventions and policy changes to promote gender equity and create a supportive environment for women in this field. |
|--|--|--|--|--|--|--|--|--|------------------------------------------------------------------------------------------------------------------------------------------------------------------------------------------------------------------------------------------------------|

|              |                                                                           |        |                       |                              |                                                          |                                                                                                                                |                                                                                                                                                                                                                                                                                                                      |                                                                                                                                                                                 |                                                                                                                                                                                                                                                                                    |
|--------------|---------------------------------------------------------------------------|--------|-----------------------|------------------------------|----------------------------------------------------------|--------------------------------------------------------------------------------------------------------------------------------|----------------------------------------------------------------------------------------------------------------------------------------------------------------------------------------------------------------------------------------------------------------------------------------------------------------------|---------------------------------------------------------------------------------------------------------------------------------------------------------------------------------|------------------------------------------------------------------------------------------------------------------------------------------------------------------------------------------------------------------------------------------------------------------------------------|
| 7. Yue, 2020 | Academic Gender Disparity in Orthopedic Surgery in Canadian Universities. | canada | Cross-sectional study | Academic orthopedic surgeons | 713 academic orthopedic surgeons (518 with H-index data) | collection from university websites, online sources (LinkedIn, Google), and Elsevier's Scopus for H-index and publication data | <ul style="list-style-type: none"> <li>- Hostile Work Environment (harassment and discrimination): - Female medical students often avoid orthopedic residencies due to potential hostility. - One in three women in academic medicine reports sexual harassment, with 47% stating it impacts their career</li> </ul> | <ul style="list-style-type: none"> <li>- Microaggression/ Harassment</li> <li>- Leadership</li> <li>- Unequal pay</li> <li>- Work-Life Balance</li> <li>- Mentorship</li> </ul> | <ul style="list-style-type: none"> <li>- Women held 13% of academic positions in orthopedic surgery, mostly in lower ranks (lecturer or assistant professor)</li> <li>- Women had lower H-index scores at higher ranks compared to men, with significant disparities at</li> </ul> |
|--------------|---------------------------------------------------------------------------|--------|-----------------------|------------------------------|----------------------------------------------------------|--------------------------------------------------------------------------------------------------------------------------------|----------------------------------------------------------------------------------------------------------------------------------------------------------------------------------------------------------------------------------------------------------------------------------------------------------------------|---------------------------------------------------------------------------------------------------------------------------------------------------------------------------------|------------------------------------------------------------------------------------------------------------------------------------------------------------------------------------------------------------------------------------------------------------------------------------|

|  |  |  |  |  |  |                                                                                                                                                                                                                                                                                                                                            |                                                                                                                                                                                                                                                                                                            |
|--|--|--|--|--|--|--------------------------------------------------------------------------------------------------------------------------------------------------------------------------------------------------------------------------------------------------------------------------------------------------------------------------------------------|------------------------------------------------------------------------------------------------------------------------------------------------------------------------------------------------------------------------------------------------------------------------------------------------------------|
|  |  |  |  |  |  | <p>advancement.</p> <ul style="list-style-type: none"> <li>- Lack of Equality in Rank and Leadership : - 79% of women are in lower academic ranks (lecturer or assistant professor).</li> <li>- Only 1.1% of full professors in orthopedics are women.</li> <li>- Women are less likely to hold leadership positions, with only</li> </ul> | <p>assistant, associate, and full professor levels.</p> <ul style="list-style-type: none"> <li>- Women were less likely to hold leadership positions, with an odds ratio (OR) of 0.52 compared to men.</li> <li>- Men occupied 87% of academic positions, with higher research productivity and</li> </ul> |
|--|--|--|--|--|--|--------------------------------------------------------------------------------------------------------------------------------------------------------------------------------------------------------------------------------------------------------------------------------------------------------------------------------------------|------------------------------------------------------------------------------------------------------------------------------------------------------------------------------------------------------------------------------------------------------------------------------------------------------------|

|  |  |  |  |  |  |                                                                                                                                                                                                                                                              |                                                                                                                                                                                                                                                          |
|--|--|--|--|--|--|--------------------------------------------------------------------------------------------------------------------------------------------------------------------------------------------------------------------------------------------------------------|----------------------------------------------------------------------------------------------------------------------------------------------------------------------------------------------------------------------------------------------------------|
|  |  |  |  |  |  | <p>10% of female academic orthopedic surgeons in leadership roles compared to nearly 20% of men.</p> <p>- Disparity in Salary: - Significant wage gap between male and female orthopedic surgeons, with women earning substantially less. - The wage gap</p> | <p>leadership representation.</p> <p>- Women earned significantly less than men in academic positions, with the wage gap persisting across all subspecialties.</p> <p>- Women in orthopedic surgery were less likely to be married and have children</p> |
|--|--|--|--|--|--|--------------------------------------------------------------------------------------------------------------------------------------------------------------------------------------------------------------------------------------------------------------|----------------------------------------------------------------------------------------------------------------------------------------------------------------------------------------------------------------------------------------------------------|

|  |  |  |  |  |  |  |                                                                                                                                                                                                                                                               |  |                                                                                                                                                                    |
|--|--|--|--|--|--|--|---------------------------------------------------------------------------------------------------------------------------------------------------------------------------------------------------------------------------------------------------------------|--|--------------------------------------------------------------------------------------------------------------------------------------------------------------------|
|  |  |  |  |  |  |  | <p>persists even with academic rank and promotions .</p> <p>- Unfavorable Work-Life Balance: Married male surgeons report better work-life balance than their unmarried counterparts, while women often face a choice between family and career. - Higher</p> |  | <p>compared to men.</p> <p>- High prevalence of sexual harassment and sex discrimination reported by women in academic medicine, affecting career advancement.</p> |
|--|--|--|--|--|--|--|---------------------------------------------------------------------------------------------------------------------------------------------------------------------------------------------------------------------------------------------------------------|--|--------------------------------------------------------------------------------------------------------------------------------------------------------------------|

|  |  |  |  |  |  |  |                                                                                                                                                                                                                                                                                                                           |  |  |
|--|--|--|--|--|--|--|---------------------------------------------------------------------------------------------------------------------------------------------------------------------------------------------------------------------------------------------------------------------------------------------------------------------------|--|--|
|  |  |  |  |  |  |  | <p>academic roles and research commitments strain work-life balance for female surgeons.</p> <ul style="list-style-type: none"><li>- Lack of Physical Strength</li><li>- Lack of Strong Mentorship</li></ul> <p>: - Lack of mentorship contributes to lower research productivity and academic progression for women.</p> |  |  |
|--|--|--|--|--|--|--|---------------------------------------------------------------------------------------------------------------------------------------------------------------------------------------------------------------------------------------------------------------------------------------------------------------------------|--|--|

|                   |                                                                                                                                          |               |                        |                                                                                                                                        |                                                                      |                                                                               |                                                                                                                                                                                                                                                                                               |                                                                                                                                                                                                               |                                                                                                                                                                                                                                                                                                                          |
|-------------------|------------------------------------------------------------------------------------------------------------------------------------------|---------------|------------------------|----------------------------------------------------------------------------------------------------------------------------------------|----------------------------------------------------------------------|-------------------------------------------------------------------------------|-----------------------------------------------------------------------------------------------------------------------------------------------------------------------------------------------------------------------------------------------------------------------------------------------|---------------------------------------------------------------------------------------------------------------------------------------------------------------------------------------------------------------|--------------------------------------------------------------------------------------------------------------------------------------------------------------------------------------------------------------------------------------------------------------------------------------------------------------------------|
| 8. Yin, 2023 (28) | Has the Increase of Women in Surgical Training Programs Led to a Concomitant Increase in Female Leadership Positions? A 10-Year Analysis | United States | Retrospective analysis | Female surgeons in various surgical specialties (Plastic, Vascular, Urologic, Neurologic, Orthopedic, Cardiothoracic, General Surgery) | 197,233 residents and 2,635 leadership positions (from 2008 to 2018) | Data analysis from public records and direct communication with organizations | <ul style="list-style-type: none"> <li>- Underrepresentation in leadership roles.</li> <li>- Gender bias and discrimination: Women face implicit and explicit gender bias, leading to fewer opportunities and less recognition.</li> <li>- Lack of female mentors and role models.</li> </ul> | <ul style="list-style-type: none"> <li>-Leadership</li> <li>- Bias</li> <li>- Mentorship</li> <li>- Career advancement opportunities.</li> <li>- Unequal pay</li> <li>-Fertility/parenthood issues</li> </ul> | <ul style="list-style-type: none"> <li>- Women in surgical leadership roles grew at a faster rate than women in residency training (11% vs. 7% annually).</li> <li>- General surgery had the highest proportion of female residents (35%) and leaders (18.8%).</li> <li>- Plastic surgery showed the greatest</li> </ul> |
|-------------------|------------------------------------------------------------------------------------------------------------------------------------------|---------------|------------------------|----------------------------------------------------------------------------------------------------------------------------------------|----------------------------------------------------------------------|-------------------------------------------------------------------------------|-----------------------------------------------------------------------------------------------------------------------------------------------------------------------------------------------------------------------------------------------------------------------------------------------|---------------------------------------------------------------------------------------------------------------------------------------------------------------------------------------------------------------|--------------------------------------------------------------------------------------------------------------------------------------------------------------------------------------------------------------------------------------------------------------------------------------------------------------------------|

|  |  |  |  |  |  |                                                                                                                                                                                                                                                                                              |                                                                                                                                                                                                                                                                                              |
|--|--|--|--|--|--|----------------------------------------------------------------------------------------------------------------------------------------------------------------------------------------------------------------------------------------------------------------------------------------------|----------------------------------------------------------------------------------------------------------------------------------------------------------------------------------------------------------------------------------------------------------------------------------------------|
|  |  |  |  |  |  | <ul style="list-style-type: none"> <li>- Hierarchical structures impeding progress: Rigid hierarchies create obstacles, such as lack of transparency and limited access to opportunities.</li> <li>- Challenges in creating supportive environments</li> <li>- Compensation gaps:</li> </ul> | <p>rate of increase in both female residents (17%) and leaders (19%).</p> <ul style="list-style-type: none"> <li>- Orthopedic and neurosurgery showed no significant difference in the growth of female representation in leadership versus residency.</li> <li>- Despite growth,</li> </ul> |
|--|--|--|--|--|--|----------------------------------------------------------------------------------------------------------------------------------------------------------------------------------------------------------------------------------------------------------------------------------------------|----------------------------------------------------------------------------------------------------------------------------------------------------------------------------------------------------------------------------------------------------------------------------------------------|

|  |  |  |  |  |  |                                                                                                                                                                                                                                                             |                                                                                                                                       |
|--|--|--|--|--|--|-------------------------------------------------------------------------------------------------------------------------------------------------------------------------------------------------------------------------------------------------------------|---------------------------------------------------------------------------------------------------------------------------------------|
|  |  |  |  |  |  | <p>Persistent pay inequity between female and male surgeons. Systemic inequalities in compensation despite similar levels of training and experience .</p> <p>-Childcare responsibilities:<br/>Women often bear a disproportionate burden of childcare,</p> | <p>significant gender disparities remain, with women still underrepresented in leadership roles across all surgical specialties .</p> |
|--|--|--|--|--|--|-------------------------------------------------------------------------------------------------------------------------------------------------------------------------------------------------------------------------------------------------------------|---------------------------------------------------------------------------------------------------------------------------------------|

|                               |                                                                                        |                                                                                                              |        |                                                                                                 |                    |                                                                                                                                    |                                                                                                                                                                                                 |                                                           |                                                                                                                                                                                          |
|-------------------------------|----------------------------------------------------------------------------------------|--------------------------------------------------------------------------------------------------------------|--------|-------------------------------------------------------------------------------------------------|--------------------|------------------------------------------------------------------------------------------------------------------------------------|-------------------------------------------------------------------------------------------------------------------------------------------------------------------------------------------------|-----------------------------------------------------------|------------------------------------------------------------------------------------------------------------------------------------------------------------------------------------------|
|                               |                                                                                        |                                                                                                              |        |                                                                                                 |                    |                                                                                                                                    | limiting career advancement opportunities.                                                                                                                                                      |                                                           |                                                                                                                                                                                          |
| 9. Cohen-Rosenblum, 2022 (43) | Repetitive Musculoskeletal Injuries: A Survey of Female Adult Reconstruction Surgeons. | United States (with some participants from Australia/New Zealand, Canada, Europe, and Central/South America) | Survey | Female adult reconstruction surgeons, particularly surgeons performing total joint arthroplasty | 63 female surgeons | Survey distributed to female adult reconstruction surgeons using subspecialty membership data, social media, and personal contacts | -High incidence of occupational musculoskeletal injuries<br>- Common injury incurred: forearm/wrist/hand, shoulder and experiencing low back<br>- 48.2% required temporary modifications of job | - Occupational injuries.<br>- Parenthood/fertility issues | - 68.3% of female adult reconstruction surgeons reported occupational musculoskeletal injuries.<br><br>- Most common injury sites: forearm/wrist/hand (79.1%), shoulder (48.8%), and low |

|  |  |  |  |  |  |                                                                                                                                                                                                                                                                                                                |                                                                                                                                                                                                                                                                                                            |
|--|--|--|--|--|--|----------------------------------------------------------------------------------------------------------------------------------------------------------------------------------------------------------------------------------------------------------------------------------------------------------------|------------------------------------------------------------------------------------------------------------------------------------------------------------------------------------------------------------------------------------------------------------------------------------------------------------|
|  |  |  |  |  |  | <p>performanc<br/>e</p> <ul style="list-style-type: none"><li>- some cases required surgical treatment for injuries that prevented the injured surgeons from work temporarily.</li><li>- Exacerbati on of pregnancy-related conditions (including low back pain, pubic symphysis pain, carpal tunnel</li></ul> | <p>back (44.2%).</p> <ul style="list-style-type: none"><li>- 10.0% of injuries resulted in time off work, and 48.2% required temporary job modificati ons.</li><li>- 10.9% required surgical treatment for injuries.</li><li>- 65.4% of surgeons who had been pregnant reported exacerbati on of</li></ul> |
|--|--|--|--|--|--|----------------------------------------------------------------------------------------------------------------------------------------------------------------------------------------------------------------------------------------------------------------------------------------------------------------|------------------------------------------------------------------------------------------------------------------------------------------------------------------------------------------------------------------------------------------------------------------------------------------------------------|

|  |  |  |  |  |  |  |                                                |  |                                                                                                                                                                                                                                                                                |
|--|--|--|--|--|--|--|------------------------------------------------|--|--------------------------------------------------------------------------------------------------------------------------------------------------------------------------------------------------------------------------------------------------------------------------------|
|  |  |  |  |  |  |  | syndrome)<br>(parenthood/ fertility<br>issues) |  | pregnancy<br>-related<br>musculoskeletal<br>conditions<br>.<br>-<br>Recommendations<br>include<br>ergonomic<br>improvements,<br>proper<br>posture,<br>appropriately sized<br>instruments, and use<br>of<br>automated or<br>lighter<br>instruments to<br>reduce<br>injury risk. |
|--|--|--|--|--|--|--|------------------------------------------------|--|--------------------------------------------------------------------------------------------------------------------------------------------------------------------------------------------------------------------------------------------------------------------------------|

|                                |                                                                                                    |     |        |                                            |     |                                                                  |                                                                                                                                                                                                                                                                                                               |                                                                                                                              |                                                                                                                                                                                                                                                                                                                                    |
|--------------------------------|----------------------------------------------------------------------------------------------------|-----|--------|--------------------------------------------|-----|------------------------------------------------------------------|---------------------------------------------------------------------------------------------------------------------------------------------------------------------------------------------------------------------------------------------------------------------------------------------------------------|------------------------------------------------------------------------------------------------------------------------------|------------------------------------------------------------------------------------------------------------------------------------------------------------------------------------------------------------------------------------------------------------------------------------------------------------------------------------|
| 10. Mulcahey<br>, 2018<br>(45) | The Perception of<br>Pregnancy and<br>Parenthood Among<br>Female Orthopaedic<br>Surgery Residents. | USA | Survey | Female<br>orthopaedic surgery<br>residents | 190 | Anony<br>mous<br>online<br>survey<br>with<br>24<br>questi<br>ons | <ul style="list-style-type: none"> <li>- Bias from co-residents about women having children during residency (59.5%)</li> <li>- Bias from attendings about women having children during residency (49.5%)</li> <li>- Lack of awareness or access to maternity leave policies and resources (45.8%)</li> </ul> | <ul style="list-style-type: none"> <li>- Fertility/parenthood issues</li> <li>- Bias</li> <li>- Work-life balance</li> </ul> | <ul style="list-style-type: none"> <li>- 83.7% of respondents did not have children during residency</li> <li>- 48.4% deferred having children because of residency</li> <li>- 59.1% of those who had children during residency took 5 to 8 weeks of maternity leave</li> <li>- There is a significant bias and lack of</li> </ul> |
|--------------------------------|----------------------------------------------------------------------------------------------------|-----|--------|--------------------------------------------|-----|------------------------------------------------------------------|---------------------------------------------------------------------------------------------------------------------------------------------------------------------------------------------------------------------------------------------------------------------------------------------------------------|------------------------------------------------------------------------------------------------------------------------------|------------------------------------------------------------------------------------------------------------------------------------------------------------------------------------------------------------------------------------------------------------------------------------------------------------------------------------|

|                         |                                                                                                                       |     |                          |                                                                    |                                                    |                                                                    |                                                                                                                                                                |                                                        |                                                                                            |
|-------------------------|-----------------------------------------------------------------------------------------------------------------------|-----|--------------------------|--------------------------------------------------------------------|----------------------------------------------------|--------------------------------------------------------------------|----------------------------------------------------------------------------------------------------------------------------------------------------------------|--------------------------------------------------------|--------------------------------------------------------------------------------------------|
|                         |                                                                                                                       |     |                          |                                                                    |                                                    |                                                                    | were unaware of their program's maternity leave policy)<br>- Challenges in work-life balance and managing parental responsibilities during demanding residency |                                                        | supportive resources for female orthopaedic residents considering pregnancy and parenthood |
| 11.M. Gerull, 2020 (34) | Are Women Proportionately Represented as Speakers at Orthopaedic Surgery Annual Meetings? A Cross-Sectional Analysis. | USA | Cross-Sectional Analysis | Orthopaedic society members and annual meeting speakers in the USA | 17 national orthopaedic societies, 33,051 members, | Analysis of gender diversity among invited speakers at orthopaedic | - Underrepresentation in Technical Sessions: Women were more likely to be invited to speak in non-                                                             | - Academic/research opportunities<br>-Leadership roles | - Women were proportionally represented overall, constituting 14% of speakers vs. 13% of   |

|  |  |  |  |  |                |                                                                                                                                                  |                                                                                                                                                                                                                                                  |  |                                                                                                                                                                                                                                                                |
|--|--|--|--|--|----------------|--------------------------------------------------------------------------------------------------------------------------------------------------|--------------------------------------------------------------------------------------------------------------------------------------------------------------------------------------------------------------------------------------------------|--|----------------------------------------------------------------------------------------------------------------------------------------------------------------------------------------------------------------------------------------------------------------|
|  |  |  |  |  | 3,928 speakers | annual meetings. Comparison of speaker roles (technical vs non-technical), society leadership roles, and diversity efforts within the societies. | technical sessions compared to technical ones.<br>- Proportional Representation Disparities: Wide variation in representation across different societies, from 0% to 33% of speakers being women.<br>- Leadership Barriers: Positive correlation |  | society members.<br>- Women were underrepresented in technical sessions but overrepresented in non-technical sessions.<br>- Societies with more women in leadership roles or explicit diversity efforts had a higher proportion of women speakers.<br>- Recomm |
|--|--|--|--|--|----------------|--------------------------------------------------------------------------------------------------------------------------------------------------|--------------------------------------------------------------------------------------------------------------------------------------------------------------------------------------------------------------------------------------------------|--|----------------------------------------------------------------------------------------------------------------------------------------------------------------------------------------------------------------------------------------------------------------|

|  |  |  |  |  |  |                                                                                                                                                                                                                                                                  |  |                                                                                                                                                                            |
|--|--|--|--|--|--|------------------------------------------------------------------------------------------------------------------------------------------------------------------------------------------------------------------------------------------------------------------|--|----------------------------------------------------------------------------------------------------------------------------------------------------------------------------|
|  |  |  |  |  |  | <p>between women in society leadership and women in speaking roles, highlighting the challenge of achieving gender balance in leadership positions.</p> <p>- Lack of Diversity Efforts: Societies without stated diversity efforts had fewer women speakers.</p> |  | <p>ndations include monitoring gender representation in conference planning, promoting women in leadership, and creating accountability through diversity initiatives.</p> |
|--|--|--|--|--|--|------------------------------------------------------------------------------------------------------------------------------------------------------------------------------------------------------------------------------------------------------------------|--|----------------------------------------------------------------------------------------------------------------------------------------------------------------------------|

|                     |                                                          |     |        |                                                                                                                                              |                                                         |                                                                                                                                            |                                                                                                                                                                                                                                                                                 |                                                     |                                                                                                                                                                                                                                                             |
|---------------------|----------------------------------------------------------|-----|--------|----------------------------------------------------------------------------------------------------------------------------------------------|---------------------------------------------------------|--------------------------------------------------------------------------------------------------------------------------------------------|---------------------------------------------------------------------------------------------------------------------------------------------------------------------------------------------------------------------------------------------------------------------------------|-----------------------------------------------------|-------------------------------------------------------------------------------------------------------------------------------------------------------------------------------------------------------------------------------------------------------------|
| 12. Nguyen, 2020 55 | The Cost of Maternity Leave for the Orthopaedic Surgeon. | USA | Survey | Female orthopaedic surgeons who are members of the Ruth Jackson Orthopaedic Society (RJOS) and the Women in Orthopaedics (WIO) online group. | 801 total respondents; 452 provided data on pregnancies | - An anonymous, 168-item online survey was distributed via web links to RJOS members and WIO group members between April and October 2018. | - Insufficient Paid Maternity Leave: The average paid leave offered was only $4.6 \pm 4.2$ weeks for the first child, which is considerably low compared to global standards.<br>- Extended Unpaid Leave Leading to Financial Burden: Surgeons took an average of $8.2 \pm 7.4$ | - Unequal pay<br>- Career advancement opportunities | - Female orthopaedic surgeons often take more maternity leave than what is offered by their employers, highlighting inadequate institutional support.<br>- The average cost of maternity leave for the first child was $\$40,932 \pm \$61,258$ , with costs |
|---------------------|----------------------------------------------------------|-----|--------|----------------------------------------------------------------------------------------------------------------------------------------------|---------------------------------------------------------|--------------------------------------------------------------------------------------------------------------------------------------------|---------------------------------------------------------------------------------------------------------------------------------------------------------------------------------------------------------------------------------------------------------------------------------|-----------------------------------------------------|-------------------------------------------------------------------------------------------------------------------------------------------------------------------------------------------------------------------------------------------------------------|

|  |  |  |  |  |                                                                                                                                                                      |                                                                                                                                                                                                                                                                               |                                                                                                                                                                                                                                                             |
|--|--|--|--|--|----------------------------------------------------------------------------------------------------------------------------------------------------------------------|-------------------------------------------------------------------------------------------------------------------------------------------------------------------------------------------------------------------------------------------------------------------------------|-------------------------------------------------------------------------------------------------------------------------------------------------------------------------------------------------------------------------------------------------------------|
|  |  |  |  |  | <p>- The survey collected data on demographic s, maternity leave characteristics (including age at conception, length of leave offered and taken, and associated</p> | <p>weeks for the first child, resulting in substantial out-of-pocket costs, especially for practicing surgeons who bore an average cost of \$45,350 compared to \$154 during training.</p> <p>- Pressure on Residents to Take Shorter Leaves: Residents took significantl</p> | <p>significantly higher for practicing surgeons compared to those in training.</p> <p>- Each additional week of unpaid leave taken increased the personal cost by approximately \$3,252, whereas each additional week of paid leave offered reduced the</p> |
|--|--|--|--|--|----------------------------------------------------------------------------------------------------------------------------------------------------------------------|-------------------------------------------------------------------------------------------------------------------------------------------------------------------------------------------------------------------------------------------------------------------------------|-------------------------------------------------------------------------------------------------------------------------------------------------------------------------------------------------------------------------------------------------------------|

|  |  |  |  |  |                                                                                                                                                                             |                                                                                                                                                                                                                                                                                                          |                                                                                                                                                                                                                                                          |
|--|--|--|--|--|-----------------------------------------------------------------------------------------------------------------------------------------------------------------------------|----------------------------------------------------------------------------------------------------------------------------------------------------------------------------------------------------------------------------------------------------------------------------------------------------------|----------------------------------------------------------------------------------------------------------------------------------------------------------------------------------------------------------------------------------------------------------|
|  |  |  |  |  | <p>costs), work habits during pregnancy, and financial implications.</p> <p>- Data were analyzed using statistical methods including Kruskal-Wallis tests, Mann-Whitney</p> | <p>y shorter leaves (6.3 ± 5.0 weeks) compared to fellows (8.3 ± 7.2 weeks) and practicing surgeons (9.6 ± 8.5 weeks), possibly due to training demands and lack of supportive policies.</p> <p>- Lack of Uniform Maternity Leave Policies: There is considerable variability and lack of standardiz</p> | <p>personal cost by about \$2,583.</p> <p>- Residents took shorter leaves, suggesting a need for policy reforms to support adequate maternity leave during training without penalizing progression.</p> <p>- The study underscores the necessity for</p> |
|--|--|--|--|--|-----------------------------------------------------------------------------------------------------------------------------------------------------------------------------|----------------------------------------------------------------------------------------------------------------------------------------------------------------------------------------------------------------------------------------------------------------------------------------------------------|----------------------------------------------------------------------------------------------------------------------------------------------------------------------------------------------------------------------------------------------------------|

|  |  |  |  |  |                                                                                                                                                                            |                                                                                                                                                                                                                                                                                                     |                                                                                                                                                                                                                                                                                                             |
|--|--|--|--|--|----------------------------------------------------------------------------------------------------------------------------------------------------------------------------|-----------------------------------------------------------------------------------------------------------------------------------------------------------------------------------------------------------------------------------------------------------------------------------------------------|-------------------------------------------------------------------------------------------------------------------------------------------------------------------------------------------------------------------------------------------------------------------------------------------------------------|
|  |  |  |  |  | <p>y U test, and multiple linear regression to assess relationships between variables and identifying significant factors affecting maternity leave cost and duration.</p> | <p>ed maternity leave policies across training programs and employment settings, leading to disparities and uncertainties.</p> <ul style="list-style-type: none"> <li>- Ongoing Overhead Costs During Leave: About 20.5% of practicing surgeons continued to pay overhead costs while on</li> </ul> | <p>standardized, supportive maternity leave policies within orthopaedic training programs and practice settings to alleviate financial burdens and promote work-life balance.</p> <ul style="list-style-type: none"> <li>- Aligning maternity leave policies with global standards could improve</li> </ul> |
|--|--|--|--|--|----------------------------------------------------------------------------------------------------------------------------------------------------------------------------|-----------------------------------------------------------------------------------------------------------------------------------------------------------------------------------------------------------------------------------------------------------------------------------------------------|-------------------------------------------------------------------------------------------------------------------------------------------------------------------------------------------------------------------------------------------------------------------------------------------------------------|

|  |  |  |  |  |  |  |                                                                                                                                                                                                                                                              |  |                                                                          |
|--|--|--|--|--|--|--|--------------------------------------------------------------------------------------------------------------------------------------------------------------------------------------------------------------------------------------------------------------|--|--------------------------------------------------------------------------|
|  |  |  |  |  |  |  | <p>maternity leave, adding to the financial strain.</p> <p>- Impact on Career Progression and Workload:<br/>The need to return to work early and manage clinical duties during pregnancy poses challenges to health, well-being, and career advancement.</p> |  | <p>job satisfaction and retention among female orthopaedic surgeons.</p> |
|--|--|--|--|--|--|--|--------------------------------------------------------------------------------------------------------------------------------------------------------------------------------------------------------------------------------------------------------------|--|--------------------------------------------------------------------------|

|                       |                                                                                                                                       |     |        |                                                                                                                                                                                     |                       |                                                                                                       |                                                                                                                                                                                                                                                                                                                          |                               |                                                                                                                                                                                                                                                    |
|-----------------------|---------------------------------------------------------------------------------------------------------------------------------------|-----|--------|-------------------------------------------------------------------------------------------------------------------------------------------------------------------------------------|-----------------------|-------------------------------------------------------------------------------------------------------|--------------------------------------------------------------------------------------------------------------------------------------------------------------------------------------------------------------------------------------------------------------------------------------------------------------------------|-------------------------------|----------------------------------------------------------------------------------------------------------------------------------------------------------------------------------------------------------------------------------------------------|
| 13. Phillips, 2014 51 | Does a surgical career affect a woman's childbearing and fertility? A report on pregnancy and fertility trends among female surgeons. | USA | survey | Female surgeons across various specialties including general surgery, gynecology, neurosurgery, ophthalmology, orthopaedics, otolaryngology, plastic surgery, podiatry, and urology | 1,021 female surgeons | Anonymous, 199-item survey distributed via specialty female surgeon interest groups and word of mouth | <ul style="list-style-type: none"> <li>- Delayed childbearing due to prolonged surgical training.</li> <li>- Higher rates of infertility compared to general US population.</li> <li>- Increased use of Assisted Reproductive Technology (ART).</li> <li>- Higher physical and psychological stress affecting</li> </ul> | - Fertility/parenthood issues | Female surgeons have their first pregnancies later, have fewer children, and face more fertility challenges than the general US population. They also use ART more frequently. The study highlights the need for better support systems to accommo |
|-----------------------|---------------------------------------------------------------------------------------------------------------------------------------|-----|--------|-------------------------------------------------------------------------------------------------------------------------------------------------------------------------------------|-----------------------|-------------------------------------------------------------------------------------------------------|--------------------------------------------------------------------------------------------------------------------------------------------------------------------------------------------------------------------------------------------------------------------------------------------------------------------------|-------------------------------|----------------------------------------------------------------------------------------------------------------------------------------------------------------------------------------------------------------------------------------------------|

|                                 |                                                                                                                              |     |              |                               |                                                    |                                           |                                                                                                                                                                                                                   |                                                                                                                                                           |                                                                                               |
|---------------------------------|------------------------------------------------------------------------------------------------------------------------------|-----|--------------|-------------------------------|----------------------------------------------------|-------------------------------------------|-------------------------------------------------------------------------------------------------------------------------------------------------------------------------------------------------------------------|-----------------------------------------------------------------------------------------------------------------------------------------------------------|-----------------------------------------------------------------------------------------------|
|                                 |                                                                                                                              |     |              |                               |                                                    |                                           | <p>pregnancy rates.</p> <ul style="list-style-type: none"> <li>- Conflict with colleagues and discrimination due to pregnancy.</li> <li>- Voluntary termination of pregnancies due to career pressure.</li> </ul> |                                                                                                                                                           | <p>date pregnancy during surgical training and practice.</p>                                  |
| 14. Ann E. Van Heest, 2016 (10) | A 5-Year Update on the Uneven Distribution of Women in Orthopaedic Surgery Residency Training Programs in the United States. | USA | Quantitative | Orthopaedic surgery residents | All ACGME-accredited orthopaedic surgery residency | Analysis of GME Track data from 2009-2014 | <ul style="list-style-type: none"> <li>- Unequal training of women across residency programs</li> <li>- Lack of female representation</li> </ul>                                                                  | <ul style="list-style-type: none"> <li>- Career advancement opportunities</li> <li>- Representation</li> <li>- Academic/research opportunities</li> </ul> | Female medical students pursuing orthopaedic surgery lag behind other specialties. From 2009- |

|                     |                               |     |               |                    |                        |               |                                                                                                            |                    |                                                                                                                                                                                                                     |
|---------------------|-------------------------------|-----|---------------|--------------------|------------------------|---------------|------------------------------------------------------------------------------------------------------------|--------------------|---------------------------------------------------------------------------------------------------------------------------------------------------------------------------------------------------------------------|
|                     |                               |     |               |                    | programs (2009 - 2014) |               | ion in many programs<br><br>- Perceived barriers in some programs (location, size, lack of female faculty) |                    | 2014, 45% of programs trained very few women (<10% female trainees), while 20% trained more than the average (>20%). Recommendations include increasing exposure, female faculty, and an environment of acceptance. |
| 15. Hoof, 2020 (26) | Gender-related Differences in | USA | Cross-section | Academic orthopaed | 4,323 orthop           | Data collecti | - Underrepre                                                                                               | - Leadership Roles | - Female faculty in                                                                                                                                                                                                 |

|                                                                                                                      |  |                 |                                                                      |                              |                                                                                                                                    |                                                                                                                                                                                                                                                                                      |                                                                                                     |                                                                                                                                                                                                                                                          |
|----------------------------------------------------------------------------------------------------------------------|--|-----------------|----------------------------------------------------------------------|------------------------------|------------------------------------------------------------------------------------------------------------------------------------|--------------------------------------------------------------------------------------------------------------------------------------------------------------------------------------------------------------------------------------------------------------------------------------|-----------------------------------------------------------------------------------------------------|----------------------------------------------------------------------------------------------------------------------------------------------------------------------------------------------------------------------------------------------------------|
| <p>Research Productivity, Position, and Advancement Among Academic Orthopaedic Faculty Within the United States.</p> |  | <p>al study</p> | <p>ic faculty members across ACGME-accredited residency programs</p> | <p>aedic faculty members</p> | <p>on from ACGME E-accredited residency program websites and Web of Science database to assess research productivity (h-index)</p> | <p>sentation in Leadership Roles: Only 1.4% of department chairs and 8.3% of division chiefs are women.<br/> - Lower Research Productivity at Junior Levels: Female assistant professors have significantly lower h-index compared to males.<br/> - Barriers to Promotion: Women</p> | <p>- Academic/ Research opportunities<br/> - Career advancement opportunities<br/> - Mentorship</p> | <p>senior ranks and leadership roles are as productive as their male counterparts.<br/> - Female representation and productivity are lower at junior levels.<br/> - Early mentorship and exposure to orthopaedics are essential for improving female</p> |
|----------------------------------------------------------------------------------------------------------------------|--|-----------------|----------------------------------------------------------------------|------------------------------|------------------------------------------------------------------------------------------------------------------------------------|--------------------------------------------------------------------------------------------------------------------------------------------------------------------------------------------------------------------------------------------------------------------------------------|-----------------------------------------------------------------------------------------------------|----------------------------------------------------------------------------------------------------------------------------------------------------------------------------------------------------------------------------------------------------------|

|  |  |  |  |  |  |  |                                                                                                                                                                                                                                                                                                                                    |  |                                                 |
|--|--|--|--|--|--|--|------------------------------------------------------------------------------------------------------------------------------------------------------------------------------------------------------------------------------------------------------------------------------------------------------------------------------------|--|-------------------------------------------------|
|  |  |  |  |  |  |  | <p>face delayed promotions , impacting their career trajectory.</p> <ul style="list-style-type: none"><li>- Limited Mentorship and Support: Lack of mentorship at early career stages hinders productivity</li><li>.</li><li>- Geographical Disparities: Research productivity and female representation vary by region.</li></ul> |  | <p>representation and success in the field.</p> |
|--|--|--|--|--|--|--|------------------------------------------------------------------------------------------------------------------------------------------------------------------------------------------------------------------------------------------------------------------------------------------------------------------------------------|--|-------------------------------------------------|

|                                    |                                                                                                                    |     |        |                             |                                    |                          |                                                                                                                                                                                                                                                                                                                                 |                                      |                                                                                                                                                                                                                                                                   |
|------------------------------------|--------------------------------------------------------------------------------------------------------------------|-----|--------|-----------------------------|------------------------------------|--------------------------|---------------------------------------------------------------------------------------------------------------------------------------------------------------------------------------------------------------------------------------------------------------------------------------------------------------------------------|--------------------------------------|-------------------------------------------------------------------------------------------------------------------------------------------------------------------------------------------------------------------------------------------------------------------|
| 16. Bohl, 2018 5049 outside source | Inappropriate Questions Asked of Female Orthopaedic Surgery Applicants From 1971 to 2015: A Cross-sectional Study. | USA | Survey | Female orthopaedic surgeons | 488 respondents out of 997 invited | Survey via questionnaire | <p>Challenges faced by female orthopaedic surgeons during residency interviews:</p> <ul style="list-style-type: none"> <li>- Inappropriate questions about raising children during residency (37.9%)</li> <li>- Questions about marital status (32.4%)</li> <li>- Inquiries about pregnancy during residency (29.7%)</li> </ul> | - Inappropriate Interviews questions | Over 60% of female orthopaedic surgery applicants were asked inappropriate questions during residency interviews between 1971 and 2015. The rate of inappropriate questioning has not decreased over time, highlighting a persistent issue in residency interview |
|------------------------------------|--------------------------------------------------------------------------------------------------------------------|-----|--------|-----------------------------|------------------------------------|--------------------------|---------------------------------------------------------------------------------------------------------------------------------------------------------------------------------------------------------------------------------------------------------------------------------------------------------------------------------|--------------------------------------|-------------------------------------------------------------------------------------------------------------------------------------------------------------------------------------------------------------------------------------------------------------------|

|                           |                                                                                                                                        |     |                               |                                                                       |                         |                                                       |                                                                                                                                                                                                                |                                                                                                                                          |                                                                              |
|---------------------------|----------------------------------------------------------------------------------------------------------------------------------------|-----|-------------------------------|-----------------------------------------------------------------------|-------------------------|-------------------------------------------------------|----------------------------------------------------------------------------------------------------------------------------------------------------------------------------------------------------------------|------------------------------------------------------------------------------------------------------------------------------------------|------------------------------------------------------------------------------|
|                           |                                                                                                                                        |     |                               |                                                                       |                         |                                                       | <ul style="list-style-type: none"> <li>- Comments on women being inferior residents to men (11.9%)</li> <li>- Fear of reporting inappropriate questions due to concerns about career impact (32.9%)</li> </ul> |                                                                                                                                          | practices. Only 1.4% of respondents reported these questions to authorities. |
| 17. Sutherland, 2021 (27) | Gender, Race, Age, Allopathic Degree, Board Score, and Research Experience Among Applicants Matching to General and Orthopedic Surgery | USA | Retrospective Cohort Analysis | General Surgery (GS) and Orthopedic Surgery (OS) residency applicants | 26,568 (GS), 7,076 (OS) | Descriptive statistics and independent sample T-tests | <ul style="list-style-type: none"> <li>- Lower numbers of women in the applicant pool despite similar</li> </ul>                                                                                               | <ul style="list-style-type: none"> <li>- Mentorship</li> <li>- Bias.</li> <li>- Representation.</li> <li>- Work-Life Balance.</li> </ul> | Women matched at higher rates than men in both GS and OS but comprise a      |

|                        |  |  |  |  |                                                                                                                                                                                                                                                                           |  |                                                                                                                                                                       |
|------------------------|--|--|--|--|---------------------------------------------------------------------------------------------------------------------------------------------------------------------------------------------------------------------------------------------------------------------------|--|-----------------------------------------------------------------------------------------------------------------------------------------------------------------------|
| Residencies, 2015-2019 |  |  |  |  | <p>qualifications as men.</p> <p>- Mentorship Opportunities: Limited access to mentorship, which is crucial for professional development and career advancement in surgery.</p> <p>-Race and Ethnicity Disparities: Underrepresented minority (URM) female applicants</p> |  | <p>disproportionately lower number of applicants. Women had similar qualifications as men, but older women had significantly lower match rates, especially in OS.</p> |
|------------------------|--|--|--|--|---------------------------------------------------------------------------------------------------------------------------------------------------------------------------------------------------------------------------------------------------------------------------|--|-----------------------------------------------------------------------------------------------------------------------------------------------------------------------|

|  |  |  |  |  |  |  |                                                                                                                                                                                                                                                        |  |  |
|--|--|--|--|--|--|--|--------------------------------------------------------------------------------------------------------------------------------------------------------------------------------------------------------------------------------------------------------|--|--|
|  |  |  |  |  |  |  | <p>face additional challenges, with lower match rates compared to non-URM applicants.</p> <p>-Age Disparities in match rates: Women aged 36 years and older have significantly lower match rates compared to their male counterparts, particularly</p> |  |  |
|--|--|--|--|--|--|--|--------------------------------------------------------------------------------------------------------------------------------------------------------------------------------------------------------------------------------------------------------|--|--|

|                           |                                                                                                                     |        |        |                                                            |       |                                                                |                                                                                                                                                                                           |                                                                                        |                                                                                                                                                                                              |
|---------------------------|---------------------------------------------------------------------------------------------------------------------|--------|--------|------------------------------------------------------------|-------|----------------------------------------------------------------|-------------------------------------------------------------------------------------------------------------------------------------------------------------------------------------------|----------------------------------------------------------------------------------------|----------------------------------------------------------------------------------------------------------------------------------------------------------------------------------------------|
|                           |                                                                                                                     |        |        |                                                            |       |                                                                | <ul style="list-style-type: none"> <li>in orthopedic surgery.</li> <li>-Gender Bias</li> <li>- Underrepresentation</li> <li>-Work-Life Balance</li> </ul>                                 |                                                                                        |                                                                                                                                                                                              |
| 18. AlSamhori, 2023<br>57 | Factors influencing gender preference towards surgeons among Jordanian adults: an investigation of healthcare bias. | Jordan | Survey | Jordanian adults of both genders from various governorates | 1,708 | Self-administered questionnaire, both online and print formats | <ul style="list-style-type: none"> <li>- Male-dominated surgical field</li> <li>- Limited representation of female surgeons</li> <li>- Cultural and religious biases affecting</li> </ul> | <ul style="list-style-type: none"> <li>- Representation.</li> <li>- Biases.</li> </ul> | <ul style="list-style-type: none"> <li>- Nearly 52% of participants had no gender preference for surgeons</li> <li>- Among those with a preference, 75.7% preferred male surgeons</li> </ul> |

|  |  |  |  |  |  |  |                                                                                                                                                                                                                                                                               |  |                                                                                                                                                                                                                                                                                                       |
|--|--|--|--|--|--|--|-------------------------------------------------------------------------------------------------------------------------------------------------------------------------------------------------------------------------------------------------------------------------------|--|-------------------------------------------------------------------------------------------------------------------------------------------------------------------------------------------------------------------------------------------------------------------------------------------------------|
|  |  |  |  |  |  |  | <p>gender preference</p> <ul style="list-style-type: none"><li>- Female surgeons are underrepresented in high-risk specialties like cardiovascular and orthopedic surgery</li><li>- Gender stereotypes influencing perceptions of surgeon competence and attributes</li></ul> |  | <ul style="list-style-type: none"><li>- Male surgeons were seen as more trustworthy and knowledgeable</li><li>- Female surgeons were perceived as more compassionate and cooperative</li><li>- Significant predictors for preferring female surgeons included female gender, living outside</li></ul> |
|--|--|--|--|--|--|--|-------------------------------------------------------------------------------------------------------------------------------------------------------------------------------------------------------------------------------------------------------------------------------|--|-------------------------------------------------------------------------------------------------------------------------------------------------------------------------------------------------------------------------------------------------------------------------------------------------------|

|                      |                                                                            |     |                 |                                                                  |     |                                                                                                                                                     |                                                                                                                                                                                                                                                                                                   |                                                                                                              |                                                                                                                                                                                                              |
|----------------------|----------------------------------------------------------------------------|-----|-----------------|------------------------------------------------------------------|-----|-----------------------------------------------------------------------------------------------------------------------------------------------------|---------------------------------------------------------------------------------------------------------------------------------------------------------------------------------------------------------------------------------------------------------------------------------------------------|--------------------------------------------------------------------------------------------------------------|--------------------------------------------------------------------------------------------------------------------------------------------------------------------------------------------------------------|
|                      |                                                                            |     |                 |                                                                  |     |                                                                                                                                                     |                                                                                                                                                                                                                                                                                                   |                                                                                                              | Amman, and being married                                                                                                                                                                                     |
| 19. Elkadi-2022 (28) | Trends in Medical Training and Leadership at Academic Orthopedic Programs. | USA | Cross-sectional | Orthopedic department chairs, vice-chairs, and program directors | 268 | Analyzed the demographic s, training, and leadership positions using data from medical and residency program rankings and professional backgrounds. | <ul style="list-style-type: none"> <li>- Significant underrepresentation in leadership roles, with only 9.0% of leadership positions held by females.</li> <li>- Limited mentorship opportunities for women.</li> <li>- Gender bias in hiring and promotion, leading to fewer women in</li> </ul> | <ul style="list-style-type: none"> <li>- Leadership roles.</li> <li>- Mentorship</li> <li>- Bias.</li> </ul> | Orthopedic leaders often come from prestigious programs. Women are underrepresented in leadership roles, which may contribute to fewer women pursuing orthopedic surgery. Increasing female leadership could |

|                     |                                                       |     |                       |                                                      |                                          |                                                  |                                                                                                                            |                                                                                                                         |                                                                                                                                             |
|---------------------|-------------------------------------------------------|-----|-----------------------|------------------------------------------------------|------------------------------------------|--------------------------------------------------|----------------------------------------------------------------------------------------------------------------------------|-------------------------------------------------------------------------------------------------------------------------|---------------------------------------------------------------------------------------------------------------------------------------------|
|                     |                                                       |     |                       |                                                      |                                          |                                                  | top academic positions.<br><br>- Disproportionate representation in less prestigious subspecialties.                       |                                                                                                                         | improve gender diversity in orthopedics.                                                                                                    |
| 20. Tosi, 1998 (19) | Ensuring the success of women in academic orthopedics | USA | Delphi Panel & Survey | Female academic orthopedic surgeons in North America | 128 women identified, 95 responses (74%) | Delphi panel discussion and 200-item mail survey | - Lack of mentoring<br><br>- Gender bias, including informal gender-exclusive networks and insufficient technical training | - Mentorship.<br>- Bias.<br>- Mental health impacts.<br>- Unequal pay.<br>- Work-life balance.<br>- Recruitment effort. | Despite progress, significant challenges remain for women in academic orthopedics. Actions are needed to improve mentoring, overcome gender |

|  |  |  |  |  |  |  |                                                                                                                                                                                                                                               |  |                                                                                                                                                                                                                                                    |
|--|--|--|--|--|--|--|-----------------------------------------------------------------------------------------------------------------------------------------------------------------------------------------------------------------------------------------------|--|----------------------------------------------------------------------------------------------------------------------------------------------------------------------------------------------------------------------------------------------------|
|  |  |  |  |  |  |  | <ul style="list-style-type: none"><li>- Social and professional isolation</li><br/><li>- Salary and promotion inequities</li><br/><li>- Balancing family responsibilities</li><br/><li>- Low recruitment of women into orthopaedics</li></ul> |  | <p>bias, reduce isolation, address salary and promotion inequities, accommodate family responsibilities, and expand recruitment. Implementing these recommendations can enhance career satisfaction and professional success for both male and</p> |
|--|--|--|--|--|--|--|-----------------------------------------------------------------------------------------------------------------------------------------------------------------------------------------------------------------------------------------------|--|----------------------------------------------------------------------------------------------------------------------------------------------------------------------------------------------------------------------------------------------------|

|                                |                                                                                                               |        |        |                                                               |                 |                                                                                 |                                                                                                                                                                                                                                                                                   |                                                                                                                                                                                    |                                                                                                                                                                                                                                          |
|--------------------------------|---------------------------------------------------------------------------------------------------------------|--------|--------|---------------------------------------------------------------|-----------------|---------------------------------------------------------------------------------|-----------------------------------------------------------------------------------------------------------------------------------------------------------------------------------------------------------------------------------------------------------------------------------|------------------------------------------------------------------------------------------------------------------------------------------------------------------------------------|------------------------------------------------------------------------------------------------------------------------------------------------------------------------------------------------------------------------------------------|
|                                |                                                                                                               |        |        |                                                               |                 |                                                                                 |                                                                                                                                                                                                                                                                                   |                                                                                                                                                                                    | female surgeons.                                                                                                                                                                                                                         |
| 21. Laurie A. Hiemstra, 2022 3 | Experiences of Canadian Female Orthopaedic Surgeons in the Workplace: Defining the Barriers to Gender Equity. | canada | Survey | Female-identifying Canadian orthopaedic surgeons and trainees | 220 respondents | Electronic survey including the Gender Bias Scale (GBS) and open-text questions | <ul style="list-style-type: none"> <li>- Constrained Communication: Difficulty in being recognized for contributions and ideas.</li> <li>- Unequal Standards: Need to work harder to gain equal recognition and scrutiny.</li> <li>- Male Culture: Exclusion from male</li> </ul> | <ul style="list-style-type: none"> <li>- Mental health impacts</li> <li>- Career advancement opportunities</li> <li>- Mentorship</li> <li>- Microaggression/ Harassment</li> </ul> | The study identified significant barriers for women in orthopaedics, including gender bias and cultural challenges. Burnout correlated with Male Privilege, Disproportionate Constraints, and Devaluation. The study calls for increased |

|                      |                                                     |     |                     |                     |                  |                   |                                                                                                                                                                                                                         |              |                                                                                  |
|----------------------|-----------------------------------------------------|-----|---------------------|---------------------|------------------|-------------------|-------------------------------------------------------------------------------------------------------------------------------------------------------------------------------------------------------------------------|--------------|----------------------------------------------------------------------------------|
|                      |                                                     |     |                     |                     |                  |                   | <p>networks and leadership opportunities.</p> <p>-Lack of Mentoring: Limited mentorship and leadership opportunities.</p> <p>-Workplace Harassment: Experiences of bullying, harassment, and sexual discrimination.</p> |              | <p>awareness and cultural change to create a fair and equitable environment.</p> |
| 22. Haruno 2023 (46) | Racial and Sex Disparities in Resident Attrition in | USA | Retrospective study | Orthopaedic surgery | 15,215 residents | Analysis of demog | - Higher attrition in female and                                                                                                                                                                                        | - Mentorship | - Female residents had a 2.2x                                                    |

|                      |  |  |                                                     |                   |                                                                        |                                                                                                                                                                                                         |                                                     |                                                                                                                                                                                  |
|----------------------|--|--|-----------------------------------------------------|-------------------|------------------------------------------------------------------------|---------------------------------------------------------------------------------------------------------------------------------------------------------------------------------------------------------|-----------------------------------------------------|----------------------------------------------------------------------------------------------------------------------------------------------------------------------------------|
| Orthopaedic Surgery. |  |  | residents, with focus on sex and racial disparities | nts (2001 - 2018) | raphic data from AAMC, focusing on attrition trends by race and gender | URiM residents - Black/African American residents had nearly 10% attrition - Lack of mentorship for URiM and female residents - Feelings of exclusion - Professional isolation - Microaggressions, male | - Mental health impact - Microaggression/harassment | higher risk of attrition - Black/African American residents had 3.8x higher attrition rate - URiM residents represented 10.14% of total but 19.51% of those leaving orthopaedics |
|----------------------|--|--|-----------------------------------------------------|-------------------|------------------------------------------------------------------------|---------------------------------------------------------------------------------------------------------------------------------------------------------------------------------------------------------|-----------------------------------------------------|----------------------------------------------------------------------------------------------------------------------------------------------------------------------------------|

|                        |                                                                                                             |     |             |                                                                       |     |                                                                                                                                           |                                                                                                                                                                                                                                      |                                      |                                                                                                                                                                                                                         |
|------------------------|-------------------------------------------------------------------------------------------------------------|-----|-------------|-----------------------------------------------------------------------|-----|-------------------------------------------------------------------------------------------------------------------------------------------|--------------------------------------------------------------------------------------------------------------------------------------------------------------------------------------------------------------------------------------|--------------------------------------|-------------------------------------------------------------------------------------------------------------------------------------------------------------------------------------------------------------------------|
|                        |                                                                                                             |     |             |                                                                       |     |                                                                                                                                           | culture, and harassment                                                                                                                                                                                                              |                                      |                                                                                                                                                                                                                         |
| 23. Kerluku, 2023 (44) | Assessing Gender Differences in Technical Skills and Confidence in Orthopaedic Surgery Residency Applicants | USA | Prospective | Medical students applying to an orthopaedic surgery residency program | 216 | Interviewees evaluated through a simulated technical task (suturing and visual field task); self-reported confidence scores pre and post- | - Female students tended to self-report lower confidence in technical skills than males after tasks.<br>- Implicit biases during training may lead to females receiving less autonomy in surgical tasks, potentially impacting their | - Technical difficulties<br>- Biases | - No significant difference in technical skills between male and female applicants<br>- Female students trended towards lower confidence, but the difference was not statistically significant<br>- USMLE Step 1 scores |

|                    |                                                                                   |     |                 |                                                                                                              |                |                                                                                                   |                                                                                                      |                                   |                                                                                          |
|--------------------|-----------------------------------------------------------------------------------|-----|-----------------|--------------------------------------------------------------------------------------------------------------|----------------|---------------------------------------------------------------------------------------------------|------------------------------------------------------------------------------------------------------|-----------------------------------|------------------------------------------------------------------------------------------|
|                    |                                                                                   |     |                 |                                                                                                              |                | task; multivariable regression analysis considering age, race, school type, and USMLE Step scores | confidence and development.                                                                          |                                   | and attending private schools correlated with lower confidence.                          |
| 24. Vij, 2022 (35) | Ethnic and Sex Diversity in Academic Orthopaedic Surgery: A Cross-sectional Study | USA | Cross-sectional | Board of directors, editorial boards, NIH grant recipients, and accreditation boards in orthopaedic surgery. | Not Applicable | Cross-sectional analysis based on collected data from website                                     | - Lack of ethnic diversity, particularly for Hispanic/Latino and African Americans.<br>- Significant | - Academic/research opportunities | - 64% of NIH grant recipients were Caucasians, 32% Asians, and only 2% Hispanic/Latinos. |

|                       |                                                                                                                               |     |                 |                                                                              |                                            |                                                |                                                                                                                                  |                                                        |                                                                                                                                                   |
|-----------------------|-------------------------------------------------------------------------------------------------------------------------------|-----|-----------------|------------------------------------------------------------------------------|--------------------------------------------|------------------------------------------------|----------------------------------------------------------------------------------------------------------------------------------|--------------------------------------------------------|---------------------------------------------------------------------------------------------------------------------------------------------------|
|                       |                                                                                                                               |     |                 |                                                                              |                                            | es and NIH RePORTER tool.                      | gender disparities across professional, research, and accreditation domains.<br><br>- Financial disparities in research funding. |                                                        | - Women received 55.2% less funding on average compared to men.<br><br>- Orthopaedic surgery lacks representation compared to the U.S. population |
| 25. Julian, 2023 (11) | A 5-Year Update and Comparison of Factors Related to the Sex Diversity of Orthopaedic Residency Programs in the United States | USA | Cross-sectional | Orthopaedic residency programs across the USA, focusing on female residents, | 696 female residents (19.2% of 3,624 total | Data collected from AMA Fellowship & Residency | - Underrepresentation of women in orthopedic residencies (19.2%)                                                                 | - Representation.<br>- Academic/research opportunities | - Female residents increased from 13.5% to 19.2% in the past 5 years                                                                              |

|  |  |  |  |                                        |                |                                                                                                                                       |                                                                                                                                                                                                                                                                                                                                                  |                                      |                                                                                                                                                                 |
|--|--|--|--|----------------------------------------|----------------|---------------------------------------------------------------------------------------------------------------------------------------|--------------------------------------------------------------------------------------------------------------------------------------------------------------------------------------------------------------------------------------------------------------------------------------------------------------------------------------------------|--------------------------------------|-----------------------------------------------------------------------------------------------------------------------------------------------------------------|
|  |  |  |  | faculty,<br>and<br>leadership<br>roles | reside<br>nts) | Datab<br>ase,<br>progra<br>m<br>websit<br>es,<br>and<br>direct<br>contac<br>t;<br>analyz<br>ed<br>using<br>indepe<br>ndent<br>t-tests | - Lack of<br>female<br>faculty in<br>many<br>programs<br><br>-Maternity<br>Leave<br>Policies:<br>Some<br>programs<br>lack clear<br>policies on<br>maternity<br>leave,<br>making the<br>field less<br>appealing<br>to women.<br><br>- Programs<br>with limited<br>or absent<br>female<br>faculty<br>struggle to<br>recruit<br>female<br>residents | -Fertility/<br>parenthood<br>issues. | - 22.1% of<br>interns<br>are<br>female<br><br>-<br>Programs<br>with<br>higher<br>female<br>faculty<br>numbers<br>tend to<br>have<br>more<br>female<br>residents |
|--|--|--|--|----------------------------------------|----------------|---------------------------------------------------------------------------------------------------------------------------------------|--------------------------------------------------------------------------------------------------------------------------------------------------------------------------------------------------------------------------------------------------------------------------------------------------------------------------------------------------|--------------------------------------|-----------------------------------------------------------------------------------------------------------------------------------------------------------------|

|                   |                                                                                                                                    |     |                      |                                                                        |                           |                                                  |                                                                                                                                                                                                                                                                         |                                    |                                                                                                                                                                                                                                        |
|-------------------|------------------------------------------------------------------------------------------------------------------------------------|-----|----------------------|------------------------------------------------------------------------|---------------------------|--------------------------------------------------|-------------------------------------------------------------------------------------------------------------------------------------------------------------------------------------------------------------------------------------------------------------------------|------------------------------------|----------------------------------------------------------------------------------------------------------------------------------------------------------------------------------------------------------------------------------------|
| 26. Hoyt, 2023 58 | Racial and Gender Diversity of Physicians Accepted to American Military Orthopaedic and Surgical Residencies: An 18-Year Analysis. | usa | Retrospective Cohort | US military physicians applying to military surgical training programs | 9,124 applicants reviewed | Retrospective review, linear regression analysis | <ul style="list-style-type: none"> <li>- Orthopaedic surgery shows lower diversity in both gender and race compared to other specialties.</li> <li>- Underrepresentation of women and URM (Underrepresented Minorities) in military orthopaedic residencies.</li> </ul> | - Military orthopedic residencies. | Despite statistically significant improvements, racial and gender disparities in military orthopaedic residencies persist. The percentage of women and URM in orthopaedics remains lower than other specialties. More focused outreach |
|-------------------|------------------------------------------------------------------------------------------------------------------------------------|-----|----------------------|------------------------------------------------------------------------|---------------------------|--------------------------------------------------|-------------------------------------------------------------------------------------------------------------------------------------------------------------------------------------------------------------------------------------------------------------------------|------------------------------------|----------------------------------------------------------------------------------------------------------------------------------------------------------------------------------------------------------------------------------------|

|                      |                                                                                                              |        |                 |                                                                                         |             |                                                                                                   |                                                                                                                                                                                               |                                                                                                                                                         |                                                                                                                                                                                                             |
|----------------------|--------------------------------------------------------------------------------------------------------------|--------|-----------------|-----------------------------------------------------------------------------------------|-------------|---------------------------------------------------------------------------------------------------|-----------------------------------------------------------------------------------------------------------------------------------------------------------------------------------------------|---------------------------------------------------------------------------------------------------------------------------------------------------------|-------------------------------------------------------------------------------------------------------------------------------------------------------------------------------------------------------------|
|                      |                                                                                                              |        |                 |                                                                                         |             |                                                                                                   | <ul style="list-style-type: none"> <li>- Limited recruitment efforts.</li> <li>- Perception of orthopaedics as an "exclusive" field.</li> </ul>                                               |                                                                                                                                                         | and diversity initiatives are needed.                                                                                                                                                                       |
| 27. Ramos, 2022 (30) | Representation of Women on Editorial Boards of Medline-Indexed Spine, Neurosurgery, and Orthopedic Journals. | BRAZIL | Cross-sectional | Editorial board members of Medline-indexed spine, neurosurgery, and orthopedic journals | 34 journals | Gender analysis of editorial board members using gender identification software and manual search | <ul style="list-style-type: none"> <li>- Underrepresentation of women on editorial boards</li> <li>- Low proportion of female editors-in-chief</li> <li>- Barriers in advancing to</li> </ul> | <ul style="list-style-type: none"> <li>- Academic/research opportunities</li> <li>- Leadership roles.</li> <li>- microaggression/harassment.</li> </ul> | <ul style="list-style-type: none"> <li>- Women represented 8.84% of editorial board members</li> <li>- Higher representation in orthopedic journals (10.77%) than spine (5.53%) and neurosurgery</li> </ul> |

|                               |                                                                                                            |     |               |                                        |       |                                |                                                                                                                                                                                                                          |                                                                                                                       |                                                                                                                                                                                                                               |
|-------------------------------|------------------------------------------------------------------------------------------------------------|-----|---------------|----------------------------------------|-------|--------------------------------|--------------------------------------------------------------------------------------------------------------------------------------------------------------------------------------------------------------------------|-----------------------------------------------------------------------------------------------------------------------|-------------------------------------------------------------------------------------------------------------------------------------------------------------------------------------------------------------------------------|
|                               |                                                                                                            |     |               |                                        |       | es<br>when<br>neces<br>sary    | leadership<br>roles<br><br>- Gender<br>discriminati<br>on<br><br>- Aexual<br>harassmen<br>t                                                                                                                              |                                                                                                                       | (8.58%)<br>journals<br>- Only<br>5.4% of<br>editors-in-<br>chief were<br>women.                                                                                                                                               |
| 28. Kalpit N. Shah, 2020 (36) | Orthopaedic Surgery Faculty: An Evaluation of Gender and Racial Diversity Compared with Other Specialties. | USA | Retrospective | Orthopaedic surgery faculty in the USA | 3,783 | Regress<br>ion<br>analysi<br>s | - Fewer<br>women in<br>orthopaedi<br>c faculty,<br>especially<br>in senior<br>roles<br><br>- Slow<br>growth in<br>diversity<br>compared<br>to other<br>specialties<br><br>- Limited<br>promotion<br>to senior<br>faculty | - Academic/<br>research<br>opportunities<br>.<br>- Representati<br>on<br>- Career<br>advancemen<br>t<br>opportunities | Orthopae<br>dic<br>surgery<br>has<br>increased<br>female<br>and URM<br>faculty<br>members,<br>but it still<br>lags<br>behind<br>other<br>specialties<br>. Women<br>make up<br>17.9% of<br>faculty,<br>with lower<br>represent |

|                     |                                                                                                              |                      |                        |                                                                           |                                                                          |                                                                             |                                                                                                                         |                                                             |                                                                                                                          |
|---------------------|--------------------------------------------------------------------------------------------------------------|----------------------|------------------------|---------------------------------------------------------------------------|--------------------------------------------------------------------------|-----------------------------------------------------------------------------|-------------------------------------------------------------------------------------------------------------------------|-------------------------------------------------------------|--------------------------------------------------------------------------------------------------------------------------|
|                     |                                                                                                              |                      |                        |                                                                           |                                                                          |                                                                             | <p>roles for women</p> <p>- Underrepresentation of women and URM in faculty ranks</p>                                   |                                                             | <p>ation in senior ranks. Efforts needed for more diverse recruitment and promotion</p>                                  |
| 29. Hariri, 2011 59 | <p>Career plans of current orthopaedic residents with a focus on sex-based and generational differences.</p> | <p>United States</p> | <p>Survey research</p> | <p>Current orthopaedic residents in postgraduate year three or higher</p> | <p>498 residents completed the survey out of 2635 contacted, results</p> | <p>An online, self-administered survey was developed using the Tailored</p> | <p>The study focused on career plans, fellowship choices, and differences based on sex and generational factors. It</p> | <p>- Career planning/fellowship<br/>- Work-life balance</p> | <p>The study found significant differences in fellowship choices between genders, with more women planning to pursue</p> |

|  |  |  |  |  |                           |                                                               |                                                               |  |                                                                                                                                                                                                                                    |
|--|--|--|--|--|---------------------------|---------------------------------------------------------------|---------------------------------------------------------------|--|------------------------------------------------------------------------------------------------------------------------------------------------------------------------------------------------------------------------------------|
|  |  |  |  |  | ng in a 19% response rate | Design Method and pre-tested with current orthopedic trainees | examined preferences for subspecialties and work-life balance |  | pediatric fellowships and fewer choosing sports fellowships. Additionally, a higher percentage of women planned to work part-time during their careers, indicating a shift in work-life balance priorities among current residents |
|--|--|--|--|--|---------------------------|---------------------------------------------------------------|---------------------------------------------------------------|--|------------------------------------------------------------------------------------------------------------------------------------------------------------------------------------------------------------------------------------|

|                    |                                                                                                               |               |                          |                                                         |                                                                                 |                                                                                                                                                                        |                                                                                                                                      |              |                                                                                                                                                                                                                           |
|--------------------|---------------------------------------------------------------------------------------------------------------|---------------|--------------------------|---------------------------------------------------------|---------------------------------------------------------------------------------|------------------------------------------------------------------------------------------------------------------------------------------------------------------------|--------------------------------------------------------------------------------------------------------------------------------------|--------------|---------------------------------------------------------------------------------------------------------------------------------------------------------------------------------------------------------------------------|
| 30. Avila, 2023 53 | Gender Differences in Reimbursement Among Orthopedic Surgeons: A Cross-sectional Analysis of Medicare Claims. | Not specified | Cross-sectional analysis | Orthopedic surgeons identified through Medicare claims. | Over 19,000 orthopaedic surgeons and approximately 40 million services analyzed | Multivariate linear regression analysis to evaluate the effect of sex on Medicare payments, controlling for various factors such as years in practice, clinical produc | Time in practice, clinical productivity, practice diversity, subspecialty, beneficiary risk scores, and place of service (Equal pay) | -Unequal pay | Female orthopaedic surgeons received significantly lower Medicare reimbursements compared to their male counterparts, highlighting the need for strategies to address these disparities and ensure equitable compensation |
|--------------------|---------------------------------------------------------------------------------------------------------------|---------------|--------------------------|---------------------------------------------------------|---------------------------------------------------------------------------------|------------------------------------------------------------------------------------------------------------------------------------------------------------------------|--------------------------------------------------------------------------------------------------------------------------------------|--------------|---------------------------------------------------------------------------------------------------------------------------------------------------------------------------------------------------------------------------|

|                      |                                                                                                           |               |                    |                                                                               |                                                         |                                                                                                                  |                                                                                             |                     |                                                                                        |
|----------------------|-----------------------------------------------------------------------------------------------------------|---------------|--------------------|-------------------------------------------------------------------------------|---------------------------------------------------------|------------------------------------------------------------------------------------------------------------------|---------------------------------------------------------------------------------------------|---------------------|----------------------------------------------------------------------------------------|
|                      |                                                                                                           |               |                    |                                                                               |                                                         | <p>tivity, and subspecialty Logistic regression to determine predictors of female sex in orthopaedic surgery</p> |                                                                                             |                     |                                                                                        |
| 31. Higgins, 2021 63 | Taking Family Call: Understanding How Orthopaedic Surgeons Manage Home, Family, and Life Responsibilities | United States | Survey-based study | Orthopaedic surgeons practicing at academic institutions in the United States | 377 respondents out of 2,043 potential recipients, with | A 28-question multiple-choice anonymous online survey was                                                        | Demographic Variables: Sex, academic title, marital status, spouse employment, and children | - Work-life balance | The study found that female orthopaedic surgeons perform more household tasks compared |

|  |  |  |  |  |                                       |                                                                                         |                                                                                                                                      |  |                                                                                                                                                                                                                                       |
|--|--|--|--|--|---------------------------------------|-----------------------------------------------------------------------------------------|--------------------------------------------------------------------------------------------------------------------------------------|--|---------------------------------------------------------------------------------------------------------------------------------------------------------------------------------------------------------------------------------------|
|  |  |  |  |  | 287 identified as men and 90 as women | used to collect data on demographics, household responsibilities, and childcare methods | Household Responsibilities: Meal preparation, grocery shopping, laundry, house cleaning, and household repairs (Family life balance) |  | to their male counterparts, despite both genders engaging in unwaged household work. There is a significant disparity in household responsibilities, with female surgeons more likely to engage in tasks such as meal preparation and |
|--|--|--|--|--|---------------------------------------|-----------------------------------------------------------------------------------------|--------------------------------------------------------------------------------------------------------------------------------------|--|---------------------------------------------------------------------------------------------------------------------------------------------------------------------------------------------------------------------------------------|

|                       |                                                                                                                    |                  |                         |                                                                                                |                                                                                |                                                                                                            |                                                                                                                                                                          |                                   |                                                                                                                                                             |
|-----------------------|--------------------------------------------------------------------------------------------------------------------|------------------|-------------------------|------------------------------------------------------------------------------------------------|--------------------------------------------------------------------------------|------------------------------------------------------------------------------------------------------------|--------------------------------------------------------------------------------------------------------------------------------------------------------------------------|-----------------------------------|-------------------------------------------------------------------------------------------------------------------------------------------------------------|
|                       |                                                                                                                    |                  |                         |                                                                                                |                                                                                |                                                                                                            |                                                                                                                                                                          |                                   | laundry, while male surgeons are more involved in financial tasks and household repairs                                                                     |
| 32. Mencia, 2022 (37) | Greater Gender Diversity Observed at Orthopaedic Conferences in the Caribbean Than in the United States or England | Caribbean region | Retrospective analysis. | Presenters at the annual meetings of The Caribbean Association of Orthopaedic Surgeons (TCOS). | 195 podium presentations were analyzed over the study period from 2016 to 2020 | The study involved a retrospective analysis of the final programs of TCOS meetings to determine the sex of | The study examined gender diversity among presenters, focusing on the proportion of female presenters, the types of topics presented, and the roles of presenters (e.g., | - Academic/research opportunities | The study concluded that there is a higher level of female presenters at TCOS compared to similar conferences in the United States and England. Despite the |

|  |  |  |  |  |  |                                                                                                                                                                       |                         |  |                                                                                                           |
|--|--|--|--|--|--|-----------------------------------------------------------------------------------------------------------------------------------------------------------------------|-------------------------|--|-----------------------------------------------------------------------------------------------------------|
|  |  |  |  |  |  | the presenter, their roles, and topics. Presenters were classified as podium presenters or moderators, and presentations were categorized as clinical or non-clinical | moderators ) (research) |  | underrepresentation, there is a positive trend towards greater female participation over the study period |
|--|--|--|--|--|--|-----------------------------------------------------------------------------------------------------------------------------------------------------------------------|-------------------------|--|-----------------------------------------------------------------------------------------------------------|

|                  |                               |                  |                   |                                                                                                    |                |                                                                                           |                                                                                                                                                                                           |                                     |                                                                                                                                                                                                                                        |
|------------------|-------------------------------|------------------|-------------------|----------------------------------------------------------------------------------------------------|----------------|-------------------------------------------------------------------------------------------|-------------------------------------------------------------------------------------------------------------------------------------------------------------------------------------------|-------------------------------------|----------------------------------------------------------------------------------------------------------------------------------------------------------------------------------------------------------------------------------------|
| 33. Errani, 2021 | Women and men in orthopaedics | not specifically | literature review | The study focuses on gender disparities among medical professionals, particularly in orthopaedics. | Not explicitly | The study design is a literature review, analyzing existing data and studies on the topic | Gender stereotypes and economic disparities<br>Organizational and individual factors contributing to gender gaps<br>Socioeconomic and cultural factors affecting occupational segregation | - Work life balance<br>- Mentorship | The study concludes that gender-based disparities in healthcare are multifactorial, involving organizational and individual factors. These include early development, work-life balance, personal choices, absence of role models, and |
|------------------|-------------------------------|------------------|-------------------|----------------------------------------------------------------------------------------------------|----------------|-------------------------------------------------------------------------------------------|-------------------------------------------------------------------------------------------------------------------------------------------------------------------------------------------|-------------------------------------|----------------------------------------------------------------------------------------------------------------------------------------------------------------------------------------------------------------------------------------|

|                   |                                                                       |                |                     |                                                      |                                                                                                                 |                                                                                                                                                      |                                                                                                                                     |                                    |                                                                                                                                                                                                                              |
|-------------------|-----------------------------------------------------------------------|----------------|---------------------|------------------------------------------------------|-----------------------------------------------------------------------------------------------------------------|------------------------------------------------------------------------------------------------------------------------------------------------------|-------------------------------------------------------------------------------------------------------------------------------------|------------------------------------|------------------------------------------------------------------------------------------------------------------------------------------------------------------------------------------------------------------------------|
|                   |                                                                       |                |                     |                                                      |                                                                                                                 |                                                                                                                                                      |                                                                                                                                     |                                    | institutional policies                                                                                                                                                                                                       |
| 34. Daniels, 2012 | Has Diversity Increased in Orthopaedic Residency Programs since 1995? | United States. | Survey-based study. | Orthopaedic residency programs in the United States. | 152 orthopaedic residency programs were contacted, with 80 responses received, resulting in a 53% response rate | A questionnaire was distributed via email to the coordinators of all ACGME-accredited orthopaedic residency programs in the U.S. The survey included | The study examined the ethnic and gender composition of orthopaedic residents, clinical faculty, and basic science research faculty | - Academic/research opportunities. | Findings: The study found an increase in the percentages of African American, Asian/Pacific Islander, and Hispanic orthopaedic residents and clinical faculty over the past 15 years. However, ethnic and gender disparities |

|                       |                                                                                             |                          |                                 |                                                                 |                      |                                                                                                                                               |                                                                         |              |                                                                                                                                                                                                                                                                       |
|-----------------------|---------------------------------------------------------------------------------------------|--------------------------|---------------------------------|-----------------------------------------------------------------|----------------------|-----------------------------------------------------------------------------------------------------------------------------------------------|-------------------------------------------------------------------------|--------------|-----------------------------------------------------------------------------------------------------------------------------------------------------------------------------------------------------------------------------------------------------------------------|
|                       |                                                                                             |                          |                                 |                                                                 |                      | ed<br>questi<br>ons on<br>ethnici<br>ty,<br>gender<br>, and<br>fellows<br>hip<br>contin<br>uation<br>among<br>reside<br>nts<br>and<br>faculty |                                                                         |              | persist in<br>orthopaed<br>ic<br>residency<br>programs<br>Recommen<br>dation:<br>To further<br>increase<br>diversity,<br>the<br>orthopaed<br>ic<br>academic<br>communit<br>y should<br>prioritize<br>recruiting<br>ethnic and<br>gender<br>minority<br>candidate<br>s |
| 35. Meadows<br>, 2022 | Racial, Ethnic, and<br>Gender Diversity in<br>Academic<br>Orthopaedic<br>Surgery Leadership | Unite<br>d<br>State<br>s | Compa<br>rative<br>analysi<br>s | The study<br>focuses<br>on<br>residents,<br>faculty,<br>program | not<br>specifi<br>ed | The<br>study<br>uses<br>demog<br>raphic<br>data                                                                                               | The study<br>examines<br>racial,<br>ethnic, and<br>gender<br>diversity, | - Leadership | The study<br>concludes<br>that while<br>there has<br>been<br>some                                                                                                                                                                                                     |

|  |  |  |  |                                                                                                                                          |  |                                                                                                                                                      |                                                                                                                                                    |  |                                                                                                                                                                                                                                         |
|--|--|--|--|------------------------------------------------------------------------------------------------------------------------------------------|--|------------------------------------------------------------------------------------------------------------------------------------------------------|----------------------------------------------------------------------------------------------------------------------------------------------------|--|-----------------------------------------------------------------------------------------------------------------------------------------------------------------------------------------------------------------------------------------|
|  |  |  |  | directors, and chairpersons at U.S. ACGME-accredited residency programs in four surgical fields and four nonsurgical primary care fields |  | collected from The Journal of the American Medical Association and the Association of American Medical Colleges to analyze changes in diversity from | specifically focusing on the representation of minorities and females in leadership roles within orthopaedic surgery compared to other specialties |  | improvement in gender diversity among chairpersons in orthopaedic surgery, there is a significant decrease in minority and female representation when comparing 2019 orthopaedic faculty to leadership in 2019/2020. This trend is also |
|--|--|--|--|------------------------------------------------------------------------------------------------------------------------------------------|--|------------------------------------------------------------------------------------------------------------------------------------------------------|----------------------------------------------------------------------------------------------------------------------------------------------------|--|-----------------------------------------------------------------------------------------------------------------------------------------------------------------------------------------------------------------------------------------|

|                   |                                                                                     |                           |                    |                                             |                     |                                                                                                                                      |                                                 |                                    |                                                                                           |
|-------------------|-------------------------------------------------------------------------------------|---------------------------|--------------------|---------------------------------------------|---------------------|--------------------------------------------------------------------------------------------------------------------------------------|-------------------------------------------------|------------------------------------|-------------------------------------------------------------------------------------------|
|                   |                                                                                     |                           |                    |                                             |                     | 2007 to 2019. Statistical methods include chi-square tests, Fisher exact tests, and Breslow-Day tests for homogeneity of odds ratios |                                                 |                                    | observed in other specialties, indicating a broader issue in medical leadership diversity |
| 36. Xu, 2023 (14) | The Importance of Perceived Barriers to Women Entering and Advancing in Orthopaedic | 27 countries, from majori | Survey-based study | Women medical students, orthopaedic surgery | 282 women completed | An anonymous online survey                                                                                                           | Barriers to entering orthopaedic surgery: male- | - Representation.<br>- Mentorship. | There are notable differences and striking                                                |

|                              |        |  |                                               |                                                              |                                                                                                                                                        |                                                                                                                                                                                                                                         |                                                                         |                                                                                                                                                                                                                                                 |
|------------------------------|--------|--|-----------------------------------------------|--------------------------------------------------------------|--------------------------------------------------------------------------------------------------------------------------------------------------------|-----------------------------------------------------------------------------------------------------------------------------------------------------------------------------------------------------------------------------------------|-------------------------------------------------------------------------|-------------------------------------------------------------------------------------------------------------------------------------------------------------------------------------------------------------------------------------------------|
| Surgery in the US and Beyond | ty USA |  | trainees, and practicing orthopaedic surgeons | the survey, with 237 from the US and 45 from other countries | was distributed via Women in Orthopaedics Worldwide, the "Women in Ortho" Facebook page, and individual programs. The survey included free-text questi | dominated culture, lack of strong female mentors, and lack of female representation at home institutions. Barriers to career advancement: lack of female leadership, family responsibilities, and gender-biased selection for promotion | - Career advancement.<br>- Leadership.<br>- Fertility/parenthood issues | similarities across countries and position levels in perceived barriers to women entering and advancing in orthopaedic surgery. The study highlights the need for understanding these barriers on an international scale to develop appropriate |
|------------------------------|--------|--|-----------------------------------------------|--------------------------------------------------------------|--------------------------------------------------------------------------------------------------------------------------------------------------------|-----------------------------------------------------------------------------------------------------------------------------------------------------------------------------------------------------------------------------------------|-------------------------------------------------------------------------|-------------------------------------------------------------------------------------------------------------------------------------------------------------------------------------------------------------------------------------------------|

|                   |                                                                                                                |               |                            |                                                                                                  |                                                                                               |                                                                                                        |                                                                                                                                                              |                  |                                                                                                                                                                       |
|-------------------|----------------------------------------------------------------------------------------------------------------|---------------|----------------------------|--------------------------------------------------------------------------------------------------|-----------------------------------------------------------------------------------------------|--------------------------------------------------------------------------------------------------------|--------------------------------------------------------------------------------------------------------------------------------------------------------------|------------------|-----------------------------------------------------------------------------------------------------------------------------------------------------------------------|
|                   |                                                                                                                |               |                            |                                                                                                  |                                                                                               | ons and a ranking of perceived barriers on a scale of 1-5                                              |                                                                                                                                                              |                  | interventions                                                                                                                                                         |
| 37. Haffner, 2021 | What is the Trend in Representation of Women and Underrepresented Minorities in Orthopaedic Surgery Residency? | United States | Retrospective survey study | All surgical residents attending ACGME-accredited institutions across seven surgical specialties | The study includes data from 16,854 residents in 2012 and 20,788 residents in 2020 across the | The study is a retrospective evaluation using a longitudinally maintained database from the ACGME Data | The study examines gender and ethnicity demographics among surgical residents, focusing on the representation of women and underrepresented minorities (URM) | - Representation | The study concludes that orthopaedic surgery has the lowest representation of women and URM residents among the seven surgical specialties analyzed. There was only a |

|                   |                                                                            |               |                     |                                                                                |                                            |                                                              |                                                                        |                                            |                                                                                                                                                                |
|-------------------|----------------------------------------------------------------------------|---------------|---------------------|--------------------------------------------------------------------------------|--------------------------------------------|--------------------------------------------------------------|------------------------------------------------------------------------|--------------------------------------------|----------------------------------------------------------------------------------------------------------------------------------------------------------------|
|                   |                                                                            |               |                     |                                                                                | seven specialties                          | Resource Books for the academic years 2011-2012 to 2019-2020 |                                                                        |                                            | small increase in the representation of women in orthopaedic surgery over the past decade, while the representation of URM groups did not change significantly |
| 38. Daniels, 2018 | Gender Disparities Within US Army Orthopedic Surgery: A Preliminary Report | United States | Observational study | US Army orthopedic staff surgeons, residents, and medical students, as well as | 252 Army orthopedic surgeons and trainees, | Descriptive statistics and two-sample z-test for propor      | Gender disparity in orthopedic surgery, early exposure to orthopedics, | - Representation<br>- Bias<br>- Mentorship | Findings: There is a significant gender disparity among US Army orthopedic surgeons,                                                                           |

|  |  |  |  |                                                                        |                                                  |                                                                                              |                                                                             |  |                                                                                                                                                                                                                                                                                     |
|--|--|--|--|------------------------------------------------------------------------|--------------------------------------------------|----------------------------------------------------------------------------------------------|-----------------------------------------------------------------------------|--|-------------------------------------------------------------------------------------------------------------------------------------------------------------------------------------------------------------------------------------------------------------------------------------|
|  |  |  |  | <p>Army service members and dependents visiting orthopedic clinics</p> | <p>with 26 (10.3%) women and 226 (89.7%) men</p> | <p>tions were used to evaluate differences between groups. Data was analyzed using Excel</p> | <p>perceptions of gender discrimination, and lack of female role models</p> |  | <p>similar to civilian orthopedics. The gender profile of the patient population is not reflected by that of the providers, which may limit patient satisfaction and access to care<br/> Implications: The study suggests the need for further investigation into the causes of</p> |
|--|--|--|--|------------------------------------------------------------------------|--------------------------------------------------|----------------------------------------------------------------------------------------------|-----------------------------------------------------------------------------|--|-------------------------------------------------------------------------------------------------------------------------------------------------------------------------------------------------------------------------------------------------------------------------------------|

|                         |                                                                                       |     |                     |                                           |                                                                               |                                                                                       |                                             |                                  |                                                                                                                                                |
|-------------------------|---------------------------------------------------------------------------------------|-----|---------------------|-------------------------------------------|-------------------------------------------------------------------------------|---------------------------------------------------------------------------------------|---------------------------------------------|----------------------------------|------------------------------------------------------------------------------------------------------------------------------------------------|
|                         |                                                                                       |     |                     |                                           |                                                                               |                                                                                       |                                             |                                  | these disparities and highlights the importance of diversity for maintaining a fit and ready force                                             |
| 39. Peterman, 2022 (16) | Gender Representation in Orthopaedic Surgery: A Geospatial Analysis From 2015 to 2022 | USA | Geospatial Analysis | Orthopaedic Surgeons in the United States | Publicly available National Provider Identifier (NPI) data from 2015 to 2022, | Geospatial analysis for publicly available (NPI) data from 2015 to 2022, contain only | Gender disparity and Geographic disparities | - Representation<br>- Mentorship | The study found that orthopaedic surgery continues to have a gender gap, with fewer women compared to men in the field. However, some regions, |

|  |  |  |  |  |                                                                                     |                                                                        |  |  |                                                                                                                                                                                                                             |
|--|--|--|--|--|-------------------------------------------------------------------------------------|------------------------------------------------------------------------|--|--|-----------------------------------------------------------------------------------------------------------------------------------------------------------------------------------------------------------------------------|
|  |  |  |  |  | contain only orthopaedic surgeons and then grouped by geographic county of practice | orthopaedic surgeons and then grouped by geographic county of practice |  |  | such as the Northwest, Northeast, and Arizona, have made progress in increasing gender diversity. The study also suggests that the presence of existing female orthopaedic surgeons in an area can positively influence the |
|--|--|--|--|--|-------------------------------------------------------------------------------------|------------------------------------------------------------------------|--|--|-----------------------------------------------------------------------------------------------------------------------------------------------------------------------------------------------------------------------------|

|                      |                                                                                                                                          |               |                        |                                                                                                                                        |                                                                               |                                                                                            |                                                                                                                                                               |                  |                                                                                                                                           |
|----------------------|------------------------------------------------------------------------------------------------------------------------------------------|---------------|------------------------|----------------------------------------------------------------------------------------------------------------------------------------|-------------------------------------------------------------------------------|--------------------------------------------------------------------------------------------|---------------------------------------------------------------------------------------------------------------------------------------------------------------|------------------|-------------------------------------------------------------------------------------------------------------------------------------------|
|                      |                                                                                                                                          |               |                        |                                                                                                                                        |                                                                               |                                                                                            |                                                                                                                                                               |                  | recruitment of more female surgeons, highlighting the importance of role models and mentorship.                                           |
| 40. Okike, 2019 (15) | Orthopaedic Faculty and Resident Sex Diversity Are Associated with the Orthopaedic Residency Application Rate of Female Medical Students | United States | An observational study | Female medical students who graduated from U.S. medical schools affiliated with orthopaedic surgery departments and residency programs | The study included data from 107 U.S. medical schools, with a total of 22,707 | The study utilized a quantitative approach, collecting data on the representation of women | The paper identifies several challenges related to the study of female medical students' interest in orthopaedics and the factors influencing their residency | - Representation | The study concluded that increased sex diversity among orthopaedic faculty and residents is associated with a higher likelihood of female |

|                      |                                                   |              |                |                         |                                                                                  |                                                                                                                                                      |                         |                      |                                                                                                                                                                                             |
|----------------------|---------------------------------------------------|--------------|----------------|-------------------------|----------------------------------------------------------------------------------|------------------------------------------------------------------------------------------------------------------------------------------------------|-------------------------|----------------------|---------------------------------------------------------------------------------------------------------------------------------------------------------------------------------------------|
|                      |                                                   |              |                |                         | female medical school graduates during the 3-year study period from 2015 to 2017 | among orthopaedic faculty and residents, as well as the proportion of female medical school graduates who applied to orthopaedic residency programs. | application rates.      |                      | medical students applying for orthopaedic residency programs. This suggests that addressing the male-dominated nature of the field could help improve female representation in orthopaedics |
| 41.Ortega, 2021 (17) | Diversity in orthopaedic trauma: where we are and | United State | A survey-based | The population consists | The study survey                                                                 | Two surveys were                                                                                                                                     | Implicit bias affecting | - Career advancement | The study highlights a                                                                                                                                                                      |

|  |                     |              |          |                                                                                    |                                                                                                          |                                                                                                                                                           |                                                                                                                                                                                                                                                                         |                                                                                                              |                                                                                                                                                                                                                                         |
|--|---------------------|--------------|----------|------------------------------------------------------------------------------------|----------------------------------------------------------------------------------------------------------|-----------------------------------------------------------------------------------------------------------------------------------------------------------|-------------------------------------------------------------------------------------------------------------------------------------------------------------------------------------------------------------------------------------------------------------------------|--------------------------------------------------------------------------------------------------------------|-----------------------------------------------------------------------------------------------------------------------------------------------------------------------------------------------------------------------------------------|
|  | where we need to be | s and Canada | research | of members of the OTA, which includes a diverse group of orthopaedic professionals | yed 1,907 OTA members, with 207 responses from the membership survey and 14 responses from course chairs | distributed: A 15-question survey to OTA members requesting demographic information and their views on diversity. An 11-question survey to past chairs of | promotion opportunities for women and URM. Concerns about the quality of leadership and faculty selection due to diversity initiatives. Underrepresentation of women and URM in orthopaedic trauma. Barriers such as work-life balance and lack of mentorship for women | - Leadership<br>- Academic/research opportunities<br>- Representation<br>- Work-life balance<br>- Mentorship | recognition of limited diversity within the OTA, particularly regarding female and underrepresented minority (URM) representation. While there is awareness of the issue, opinions vary on how to address it, with some members feeling |
|--|---------------------|--------------|----------|------------------------------------------------------------------------------------|----------------------------------------------------------------------------------------------------------|-----------------------------------------------------------------------------------------------------------------------------------------------------------|-------------------------------------------------------------------------------------------------------------------------------------------------------------------------------------------------------------------------------------------------------------------------|--------------------------------------------------------------------------------------------------------------|-----------------------------------------------------------------------------------------------------------------------------------------------------------------------------------------------------------------------------------------|

|                     |                                                                                                                                         |               |                                                                   |                                                                                      |                                                          |                                                                         |                                                                                                                                                       |                                           |                                                                                                                                                          |
|---------------------|-----------------------------------------------------------------------------------------------------------------------------------------|---------------|-------------------------------------------------------------------|--------------------------------------------------------------------------------------|----------------------------------------------------------|-------------------------------------------------------------------------|-------------------------------------------------------------------------------------------------------------------------------------------------------|-------------------------------------------|----------------------------------------------------------------------------------------------------------------------------------------------------------|
|                     |                                                                                                                                         |               |                                                                   |                                                                                      |                                                          | OTA educational courses evaluating their criteria for faculty selection | Divergent opinions on the necessity of diversity initiatives among members Cultural stereotypes portraying orthopaedic surgery as an "old boys' club" |                                           | that diversity initiatives could introduce bias, The study emphasizes the need for better demographic data collection to inform future diversity efforts |
| 42. Wang, 2023 (18) | Trends in Race and Sex Representation Among Entering Orthopaedic Surgery Residents: A Continued Call for Active Diversification Efforts | United States | A retrospective study that analyzes trends over a 20-year period. | orthopaedic surgery residencies and other surgical residencies in the United States. | The study utilized data from the American Association of | The study involved tabulating the total number of entering              | Historical Context Demographic Trends Representation of Underrepresented Minorities (UIM)                                                             | - Representation<br>- Recruitment efforts | The study concluded that while there has been some improvement in sex diversity among entering                                                           |

|  |  |  |  |  |                                                                                                                                      |                                                                                                                                                                                |                                                                                                                                            |  |                                                                                                                                                                                                                                                                      |
|--|--|--|--|--|--------------------------------------------------------------------------------------------------------------------------------------|--------------------------------------------------------------------------------------------------------------------------------------------------------------------------------|--------------------------------------------------------------------------------------------------------------------------------------------|--|----------------------------------------------------------------------------------------------------------------------------------------------------------------------------------------------------------------------------------------------------------------------|
|  |  |  |  |  | <p>Medical Colleges' Graduate Medical Education Track, covering all individuals entering surgical residencies from 2001 to 2020.</p> | <p>residents for orthopaedic surgery and for all surgical residencies combined each year. Proportions by sex and race were calculated for both cohorts, with the aggregate</p> | <p>Self-Identification Issues<br/>Data<br/>Limitations<br/>Complexity of Racial Identities<br/>Need for Improved Recruitment Practices</p> |  | <p>orthopaedic surgery residents, efforts to increase racial diversity have been less successful. It emphasizes the need for ongoing recruitment efforts to better reflect the diversity of the patient population served. The findings suggest that institution</p> |
|--|--|--|--|--|--------------------------------------------------------------------------------------------------------------------------------------|--------------------------------------------------------------------------------------------------------------------------------------------------------------------------------|--------------------------------------------------------------------------------------------------------------------------------------------|--|----------------------------------------------------------------------------------------------------------------------------------------------------------------------------------------------------------------------------------------------------------------------|

|  |  |  |  |  |  |                                                                                                                                                                             |  |  |                                                                                                         |
|--|--|--|--|--|--|-----------------------------------------------------------------------------------------------------------------------------------------------------------------------------|--|--|---------------------------------------------------------------------------------------------------------|
|  |  |  |  |  |  | <p>surgical cohort serving as a comparator group for the orthopaedic surgery cohort. Data on self-reported sex and race were collected, and a line of best fit was used</p> |  |  | <p>s should consider updating demographic questionnaires to be more inclusive of various identities</p> |
|--|--|--|--|--|--|-----------------------------------------------------------------------------------------------------------------------------------------------------------------------------|--|--|---------------------------------------------------------------------------------------------------------|

|                 |                                      |               |                    |                                  |                    |                                                                                                                           |                                 |                         |                                           |
|-----------------|--------------------------------------|---------------|--------------------|----------------------------------|--------------------|---------------------------------------------------------------------------------------------------------------------------|---------------------------------|-------------------------|-------------------------------------------|
|                 |                                      |               |                    |                                  |                    | to estimate when orthopaedic surgery would achieve equal sex representation (50%) based on annual data from 2001 to 2020. |                                 |                         |                                           |
| 43. Keene, 2011 | Occupational Hazards to the Pregnant | United States | review of existing | The focus is on female orthopaed | The paper does not | The study employs a                                                                                                       | Occupational Risks Physical and | - Occupational injuries | The paper concludes that as the number of |

|  |                     |  |            |                                                                 |                                                                                                                 |                                                                                                                                                                  |                  |                               |                                                                                                                                                                                                                                                                            |
|--|---------------------|--|------------|-----------------------------------------------------------------|-----------------------------------------------------------------------------------------------------------------|------------------------------------------------------------------------------------------------------------------------------------------------------------------|------------------|-------------------------------|----------------------------------------------------------------------------------------------------------------------------------------------------------------------------------------------------------------------------------------------------------------------------|
|  | Orthopaedic Surgeon |  | literature | ic surgeons and residents, particularly those who are pregnant. | provide a specific sample size as it reviews various studies and surveys related to the population of interest. | literature review methodology, synthesizing findings from multiple studies regarding the occupational risks faced by pregnant orthopaedic surgeons. It discusses | Emotional Stress | - Fertility/parenthood issues | female orthopaedic surgeons increases, there is a critical need for awareness and proactive measures to mitigate the unique occupational risks they face during pregnancy. This includes understanding the potential impacts of their work environment on their health and |
|--|---------------------|--|------------|-----------------------------------------------------------------|-----------------------------------------------------------------------------------------------------------------|------------------------------------------------------------------------------------------------------------------------------------------------------------------|------------------|-------------------------------|----------------------------------------------------------------------------------------------------------------------------------------------------------------------------------------------------------------------------------------------------------------------------|

|                 |                                                                                                         |               |                       |                                                     |                                                 |                                                                                                  |                                                                               |                                                                                   |                                                                                                 |
|-----------------|---------------------------------------------------------------------------------------------------------|---------------|-----------------------|-----------------------------------------------------|-------------------------------------------------|--------------------------------------------------------------------------------------------------|-------------------------------------------------------------------------------|-----------------------------------------------------------------------------------|-------------------------------------------------------------------------------------------------|
|                 |                                                                                                         |               |                       |                                                     |                                                 | various hazards including exposure to chemicals, radiation, and emotional and physical stressors |                                                                               |                                                                                   | that of their child, thereby enabling informed decision-making regarding occupational exposures |
| 44. Sobel, 2018 | Analysis of Factors Related to the Sex Diversity of Orthopaedic Residency Programs in the United States | United States | Cross-sectional study | Orthopaedic residency programs in the United States | data were obtained from 143 out of 147 programs | An online survey was distributed to residency programs                                           | The presence of female faculty members and their ranks (professors, associate | - Academic/research opportunities<br>- Interview questions<br>- Work-life balance | The study concluded that orthopaedic residency programs with higher                             |

|  |  |  |  |  |                                                                               |                                                                                            |                                                                                                                                                                                                                                                                 |  |                                                                                                                                                                                                                                      |
|--|--|--|--|--|-------------------------------------------------------------------------------|--------------------------------------------------------------------------------------------|-----------------------------------------------------------------------------------------------------------------------------------------------------------------------------------------------------------------------------------------------------------------|--|--------------------------------------------------------------------------------------------------------------------------------------------------------------------------------------------------------------------------------------|
|  |  |  |  |  | ams, identifying a total of 3,406 residents, of which 485 (14.2%) were female | m coordinators, which included 17 questions about program characteristics and demographics | professors) . The existence of women's sports medicine programs. Availability of research years and program rankings in NIH funding and U.S. News & World Report . The study also considered the impact of interview experiences and lifestyle issues on female |  | percentages of female residents tend to have more female faculty members, women in leadership roles, and dedicated women's sports medicine programs. These factors may enhance the recruitment and retention of female applicants in |
|--|--|--|--|--|-------------------------------------------------------------------------------|--------------------------------------------------------------------------------------------|-----------------------------------------------------------------------------------------------------------------------------------------------------------------------------------------------------------------------------------------------------------------|--|--------------------------------------------------------------------------------------------------------------------------------------------------------------------------------------------------------------------------------------|

|               |                                                     |               |                          |                                  |                  |                     |                                    |                  |                                                                                                                                                                                                                         |
|---------------|-----------------------------------------------------|---------------|--------------------------|----------------------------------|------------------|---------------------|------------------------------------|------------------|-------------------------------------------------------------------------------------------------------------------------------------------------------------------------------------------------------------------------|
|               |                                                     |               |                          |                                  |                  |                     | applicants' decisions              |                  | orthopaedic surgery. The findings suggest that addressing these factors could help improve female interest in orthopaedic surgery as a specialty, which is crucial given the underrepresentation of women in this field |
| 45. Day, 2019 | BREAKING BARRIERS: A BRIEF OVERVIEW OF DIVERSITY IN | United States | This is a review article | The population examined includes | reviews multiple | The study employs a | Gender representation, noting that | - Representation | The study concludes that despite                                                                                                                                                                                        |

|                           |  |                                                                                 |                                                                                                                                            |                                                                   |                                                                                                                            |                                                                                                                                                                                                                                                                            |  |                                                                                                                                                                                                                                                                       |
|---------------------------|--|---------------------------------------------------------------------------------|--------------------------------------------------------------------------------------------------------------------------------------------|-------------------------------------------------------------------|----------------------------------------------------------------------------------------------------------------------------|----------------------------------------------------------------------------------------------------------------------------------------------------------------------------------------------------------------------------------------------------------------------------|--|-----------------------------------------------------------------------------------------------------------------------------------------------------------------------------------------------------------------------------------------------------------------------|
| <p>ORTHOPEDIC SURGERY</p> |  | <p>that synthesizes existing literature on diversity in orthopedic surgery.</p> | <p>medical students, orthopedic surgery residents, and faculty members, with a specific focus on gender, racial, and ethnic diversity.</p> | <p>studies and data sources to highlight trends in diversity.</p> | <p>literature review methodology, analyzing various studies and statistics related to diversity in orthopedic surgery.</p> | <p>females make up about 50% of medical school graduates but only 14% of orthopedic surgery residents. Racial and ethnic representation, highlighting that African Americans and Hispanics are significantly underrepresented in orthopedic training programs compared</p> |  | <p>ongoing efforts to promote diversity in orthopedic surgery, significant disparities remain. The representation of females and underrepresented minorities (URM) is increasing but at a slower rate than in other surgical subspecialties. The paper emphasizes</p> |
|---------------------------|--|---------------------------------------------------------------------------------|--------------------------------------------------------------------------------------------------------------------------------------------|-------------------------------------------------------------------|----------------------------------------------------------------------------------------------------------------------------|----------------------------------------------------------------------------------------------------------------------------------------------------------------------------------------------------------------------------------------------------------------------------|--|-----------------------------------------------------------------------------------------------------------------------------------------------------------------------------------------------------------------------------------------------------------------------|

|                    |                                                       |               |                     |                                                                           |                                                  |                                                          |                                                                                                                                                                                             |                                  |                                                                                                                   |
|--------------------|-------------------------------------------------------|---------------|---------------------|---------------------------------------------------------------------------|--------------------------------------------------|----------------------------------------------------------|---------------------------------------------------------------------------------------------------------------------------------------------------------------------------------------------|----------------------------------|-------------------------------------------------------------------------------------------------------------------|
|                    |                                                       |               |                     |                                                                           |                                                  |                                                          | to their population percentages<br>The historical context of diversity in the field, including the slow progress in increasing female representation compared to other surgical specialties |                                  | es the need for targeted initiatives to enhance diversity and improve healthcare outcomes for diverse populations |
| 46. Gebhardt, 2007 | Improving Diversity in Orthopaedic Residency Programs | United States | Observational study | Orthopaedic residency programs and their applicants, specifically looking | The study references data from various residence | The study utilized surveys and demographic data analysis | Historical underrepresentation of women and minorities in orthopaedics                                                                                                                      | - Representation<br>- Mentorship | The study concludes that increasing diversity in orthopaedic residency                                            |

|  |  |  |  |                                               |                                                                                                                                                 |                                                                                                                                                                         |                                                                                                                                                                                                                                                                           |                                                                                                                                                                                                                                               |
|--|--|--|--|-----------------------------------------------|-------------------------------------------------------------------------------------------------------------------------------------------------|-------------------------------------------------------------------------------------------------------------------------------------------------------------------------|---------------------------------------------------------------------------------------------------------------------------------------------------------------------------------------------------------------------------------------------------------------------------|-----------------------------------------------------------------------------------------------------------------------------------------------------------------------------------------------------------------------------------------------|
|  |  |  |  | <p>at gender and racial/ethnic diversity.</p> | <p>ncy programs, including a survey sent to 159 residency program directors, but does not specify an exact sample size for the entire study</p> | <p>s to assess the representation of women and racial/ethnic minorities in orthopaedic residency programs. It also reviewed historical data on medical school demog</p> | <p>The need for affirmative action and similar programs to enhance diversity</p> <p>The importance of role models and mentorship for female and minority medical students</p> <p>The impact of cultural diversity on patient care and physician-patient relationships</p> | <p>programs is essential for improving the quality of care provided to patients. It emphasizes that a more diverse residency class can enhance communication and understanding between physicians and patients from different backgrounds</p> |
|--|--|--|--|-----------------------------------------------|-------------------------------------------------------------------------------------------------------------------------------------------------|-------------------------------------------------------------------------------------------------------------------------------------------------------------------------|---------------------------------------------------------------------------------------------------------------------------------------------------------------------------------------------------------------------------------------------------------------------------|-----------------------------------------------------------------------------------------------------------------------------------------------------------------------------------------------------------------------------------------------|

|                         |                                                                                 |                          |                                              |                                                      |                                      |                                                                                                              |                                                              |                                                             |                                                                                                                                                                                                                                                              |
|-------------------------|---------------------------------------------------------------------------------|--------------------------|----------------------------------------------|------------------------------------------------------|--------------------------------------|--------------------------------------------------------------------------------------------------------------|--------------------------------------------------------------|-------------------------------------------------------------|--------------------------------------------------------------------------------------------------------------------------------------------------------------------------------------------------------------------------------------------------------------|
|                         |                                                                                 |                          |                                              |                                                      |                                      | raphic<br>s and<br>reside<br>ncy<br>applic<br>ations<br>to<br>highlig<br>ht<br>trends<br>in<br>diversi<br>ty |                                                              |                                                             | The<br>authors<br>advocate<br>for<br>systemic<br>changes,<br>including<br>better<br>recruitme<br>nt<br>strategies<br>and<br>education<br>al<br>initiatives,<br>to attract<br>more<br>female<br>and<br>minority<br>applicants<br>to<br>orthopaedic<br>surgery |
| 47. Heest,<br>2021 (38) | A 15-Year Report on<br>the Uneven<br>Distribution of<br>Women in<br>Orthopaedic | Unite<br>d<br>State<br>s | Descrip<br>tive<br>statistic<br>s<br>analysi | The study<br>focuses<br>on<br>orthopaedic<br>surgery | The<br>study<br>analy<br>zed<br>data | The<br>study<br>utilized<br>descri<br>ptive                                                                  | The study<br>identified<br>several<br>factors<br>influencing | -<br>Academic/re<br>search<br>opportunities<br>- Leadership | The study<br>concluded<br>that<br>despite a<br>slow                                                                                                                                                                                                          |

|                                                                 |  |                                          |                                                                                                                             |                                                                                                                                       |                                                                                                                                                              |                                                                                                                                                                                                                                                                    |                     |                                                                                                                                                                                                                                         |
|-----------------------------------------------------------------|--|------------------------------------------|-----------------------------------------------------------------------------------------------------------------------------|---------------------------------------------------------------------------------------------------------------------------------------|--------------------------------------------------------------------------------------------------------------------------------------------------------------|--------------------------------------------------------------------------------------------------------------------------------------------------------------------------------------------------------------------------------------------------------------------|---------------------|-----------------------------------------------------------------------------------------------------------------------------------------------------------------------------------------------------------------------------------------|
| <p>Surgery Residency Training Programs in the United States</p> |  | <p>s of residency training programs.</p> | <p>residency training programs across the United States, specifically examining the representation of female residents.</p> | <p>from 175 to 179 residency programs that met inclusion criteria for the analysis over the most recent 5 years of GME Track data</p> | <p>statistics to calculate frequency counts, percentages, and chi-square analyses. Data were sourced from the GME Track, a national database required by</p> | <p>the representation of women in orthopaedic surgery, including the presence of female faculty and leadership, which correlated with higher numbers of female residents. The analysis also highlighted the importance of mentorship and role models for women</p> | <p>- Mentorship</p> | <p>increase in the percentage of female residents in orthopaedic surgery, significant disparities remain. For instance, only 15% of orthopaedic residents are female, compared to 57% of undergraduates and 50% of medical students</p> |
|-----------------------------------------------------------------|--|------------------------------------------|-----------------------------------------------------------------------------------------------------------------------------|---------------------------------------------------------------------------------------------------------------------------------------|--------------------------------------------------------------------------------------------------------------------------------------------------------------|--------------------------------------------------------------------------------------------------------------------------------------------------------------------------------------------------------------------------------------------------------------------|---------------------|-----------------------------------------------------------------------------------------------------------------------------------------------------------------------------------------------------------------------------------------|

|  |  |  |  |  |  |                                                                                                                                                                      |                                         |  |                                                                                                                                                                                                |
|--|--|--|--|--|--|----------------------------------------------------------------------------------------------------------------------------------------------------------------------|-----------------------------------------|--|------------------------------------------------------------------------------------------------------------------------------------------------------------------------------------------------|
|  |  |  |  |  |  | <p>the AMA and AAMC, which provided the most accurate sex data available for residency training programs. Programs were classified based on the number of female</p> | <p>pursuing careers in orthopaedics</p> |  | <p>being female. The findings indicated that if current trends continue, achieving a 30% representation of women in orthopaedic residency programs may not occur until approximately 2060.</p> |
|--|--|--|--|--|--|----------------------------------------------------------------------------------------------------------------------------------------------------------------------|-----------------------------------------|--|------------------------------------------------------------------------------------------------------------------------------------------------------------------------------------------------|

|               |                                                                                                                                                        |               |                                                                               |                                                                                                                            |                             |                                                                                   |                                                                                                                                              |                      |                                                                                                                                  |
|---------------|--------------------------------------------------------------------------------------------------------------------------------------------------------|---------------|-------------------------------------------------------------------------------|----------------------------------------------------------------------------------------------------------------------------|-----------------------------|-----------------------------------------------------------------------------------|----------------------------------------------------------------------------------------------------------------------------------------------|----------------------|----------------------------------------------------------------------------------------------------------------------------------|
|               |                                                                                                                                                        |               |                                                                               |                                                                                                                            |                             | residents and their percentage relative to national averages over a 5-year period |                                                                                                                                              |                      |                                                                                                                                  |
| 48. Ojo, 2023 | A 25-Year Analysis of Diversity, Equity, and Inclusion Research in Orthopaedics Shows Majority Female Authorship and Increasing Gender Parity Research | United States | scoping review that analyzes trends in diversity, equity, and inclusion (DEI) | The population of interest includes articles related to DEI in orthopaedic surgery, focusing on authorship and institution | A total of 143 DEI articles | The study involved a systematic search of DEI articles using various databases    | The study examined various factors, including gender representation among authors, institutional contributions, and the focus of articles on | - Representativeness | The study concluded that while there has been a significant increase in DEI research output in orthopaedic surgery, particularly |

|  |  |  |                                                                        |                  |  |                                                                                                                                                              |                                                              |  |                                                                                                                                                                                                                                               |
|--|--|--|------------------------------------------------------------------------|------------------|--|--------------------------------------------------------------------------------------------------------------------------------------------------------------|--------------------------------------------------------------|--|-----------------------------------------------------------------------------------------------------------------------------------------------------------------------------------------------------------------------------------------------|
|  |  |  | research within the field of orthopaedic surgery over a 25-year period | al contributions |  | ses, including PubMed and MEDLINE, with specific key terms related to orthopaedic surgery, diversity, inclusion, and equity. The inclusion criteria required | gender disparities, race/ethnicity, and inclusion strategies |  | regarding gender parity, there remains a substantial need for growth in the areas of race/ethnicity and inclusion. The findings highlight the importance of continued efforts from various stakeholders to enhance representation and address |
|--|--|--|------------------------------------------------------------------------|------------------|--|--------------------------------------------------------------------------------------------------------------------------------------------------------------|--------------------------------------------------------------|--|-----------------------------------------------------------------------------------------------------------------------------------------------------------------------------------------------------------------------------------------------|

|  |  |  |  |  |  |                                                                                                                                                                       |  |  |                                  |
|--|--|--|--|--|--|-----------------------------------------------------------------------------------------------------------------------------------------------------------------------|--|--|----------------------------------|
|  |  |  |  |  |  | articles to be published in English from December 31, 1998, to December 31, 2022, and to evaluate disparities in race/ethnicity, sex, and other minoritized groups in |  |  | disparities within the specialty |
|--|--|--|--|--|--|-----------------------------------------------------------------------------------------------------------------------------------------------------------------------|--|--|----------------------------------|

|  |  |  |  |  |  |                                                                                                                                                                         |  |  |  |
|--|--|--|--|--|--|-------------------------------------------------------------------------------------------------------------------------------------------------------------------------|--|--|--|
|  |  |  |  |  |  | orthopaedics<br>Data collected included the year of publication, article topic, sex of the primary author, publishing journal, citation index, and primary contributing |  |  |  |
|--|--|--|--|--|--|-------------------------------------------------------------------------------------------------------------------------------------------------------------------------|--|--|--|

|                         |                                                                                                                                               |                |                                                                             |                                                                                                 |                                                                                                                                              |                                                                                                                                                        |                                                                                                                                                                               |                         |                                                                                                                                                                                                                                                  |
|-------------------------|-----------------------------------------------------------------------------------------------------------------------------------------------|----------------|-----------------------------------------------------------------------------|-------------------------------------------------------------------------------------------------|----------------------------------------------------------------------------------------------------------------------------------------------|--------------------------------------------------------------------------------------------------------------------------------------------------------|-------------------------------------------------------------------------------------------------------------------------------------------------------------------------------|-------------------------|--------------------------------------------------------------------------------------------------------------------------------------------------------------------------------------------------------------------------------------------------|
|                         |                                                                                                                                               |                |                                                                             |                                                                                                 |                                                                                                                                              | instituti<br>on                                                                                                                                        |                                                                                                                                                                               |                         |                                                                                                                                                                                                                                                  |
| 49. Cohen,<br>2022 (21) | How do orthopaedic surgery residency program websites feature diversity? An analysis of 187 orthopaedic surgery programs in the United States | United States. | observational study that analyzes the content of residency program websites | The population consists of 187 orthopaedic surgery residency programs across the United States. | The sample size includes all available orthopaedic surgery residency program websites, totaling 187 programs. No sample size calculation was | The study involved a systematic evaluation of the websites of orthopaedic surgery residency programs to assess the presence of diversity and inclusion | NIH funding levels<br>Top-40 medical school affiliation<br>University versus community-based program affiliation<br>Program size<br>Geographic region<br>(Recruitment effort) | -<br>Recruitment effort | the study concluded that most orthopaedic surgery residency websites contained fewer than half of the diversity and inclusion elements evaluated. This indicates significant opportunities for programs to enhance their commitment to diversity |

|  |  |  |  |  |                                                               |                                                                                                                                                           |  |  |                                                                                                                                                                                               |
|--|--|--|--|--|---------------------------------------------------------------|-----------------------------------------------------------------------------------------------------------------------------------------------------------|--|--|-----------------------------------------------------------------------------------------------------------------------------------------------------------------------------------------------|
|  |  |  |  |  | performed since data were obtained from all available sources | elements. The authors identified 12 specific elements that represent a program's commitment to diversity and inclusion, based on prior research and recom |  |  | and inclusion. The inclusion of such initiatives on program websites may attract a more diverse applicant pool and help address existing gender and racial disparities in orthopaedic surgery |
|--|--|--|--|--|---------------------------------------------------------------|-----------------------------------------------------------------------------------------------------------------------------------------------------------|--|--|-----------------------------------------------------------------------------------------------------------------------------------------------------------------------------------------------|

|  |  |  |  |  |  |                                                                                                                                                                                                                                                     |  |  |  |
|--|--|--|--|--|--|-----------------------------------------------------------------------------------------------------------------------------------------------------------------------------------------------------------------------------------------------------|--|--|--|
|  |  |  |  |  |  | menda<br>tions<br>from<br>the<br>Accred<br>itation<br>Counci<br>l for<br>Gradu<br>ate<br>Medic<br>al<br>Educat<br>ion<br>(ACG<br>ME)<br>Statisti<br>cal<br>analys<br>es,<br>includi<br>ng<br>Mann-<br>Whitne<br>y U<br>tests<br>and<br>Kruska<br>l- |  |  |  |
|--|--|--|--|--|--|-----------------------------------------------------------------------------------------------------------------------------------------------------------------------------------------------------------------------------------------------------|--|--|--|

|  |  |  |  |  |                                                                                                                                                                 |  |  |  |
|--|--|--|--|--|-----------------------------------------------------------------------------------------------------------------------------------------------------------------|--|--|--|
|  |  |  |  |  | Wallis tests, were used to evaluate the relationship between diversity scores and various program characteristics such as NIH funding, medical school affiliati |  |  |  |
|--|--|--|--|--|-----------------------------------------------------------------------------------------------------------------------------------------------------------------|--|--|--|

|                       |                                                                              |                  |                                                                                                                                  |                                                                                                                                                                                          |                                                                                                                                                                                                              |                                                                                                                                                                                                |                                                                                                                                                                                                                                                                             |                                                             |                                                                                                                                                                                                                                                             |
|-----------------------|------------------------------------------------------------------------------|------------------|----------------------------------------------------------------------------------------------------------------------------------|------------------------------------------------------------------------------------------------------------------------------------------------------------------------------------------|--------------------------------------------------------------------------------------------------------------------------------------------------------------------------------------------------------------|------------------------------------------------------------------------------------------------------------------------------------------------------------------------------------------------|-----------------------------------------------------------------------------------------------------------------------------------------------------------------------------------------------------------------------------------------------------------------------------|-------------------------------------------------------------|-------------------------------------------------------------------------------------------------------------------------------------------------------------------------------------------------------------------------------------------------------------|
|                       |                                                                              |                  |                                                                                                                                  |                                                                                                                                                                                          |                                                                                                                                                                                                              | on,<br>and<br>geogra<br>phic<br>locatio<br>n                                                                                                                                                   |                                                                                                                                                                                                                                                                             |                                                             |                                                                                                                                                                                                                                                             |
| 50. Albright,<br>2022 | Orthopaedic Society<br>Leadership Diversity<br>and Academic<br>Participation | United<br>States | this<br>research<br>is a<br>mixed-<br>method<br>study,<br>utilizing<br>both<br>survey<br>s and<br>publicly<br>availabl<br>e data | the<br>population<br>of interest<br>includes<br>members<br>and board<br>members<br>of national<br>and<br>subspecia<br>lty<br>orthopaed<br>ic<br>societies<br>in the<br>United<br>States. | A total<br>of 24<br>nation<br>al and<br>subsp<br>ecialty<br>orthop<br>aed<br>societi<br>es<br>were<br>invite<br>d to<br>partici<br>pate<br>in the<br>study,<br>with<br>19<br>societi<br>es<br>(79%)<br>compl | The<br>study<br>emplo<br>yed a<br>survey<br>metho<br>d<br>using<br>Resea<br>rch<br>Electro<br>nic<br>Data<br>Captur<br>e<br>(RED<br>Cap)<br>to<br>collect<br>data<br>on the<br>sex,<br>racial, | Sex<br>compositio<br>n of society<br>members<br>and board<br>members.<br>Racial and<br>ethnic<br>demograph<br>ics of<br>society<br>members<br>and board<br>members.<br>Academic<br>participatio<br>n metrics<br>of<br>leadership,<br>including<br>the h-<br>index,<br>which | -<br>Academic/re<br>search<br>opportunities<br>- Leadership | The study<br>concluded<br>that there<br>is a<br>significant<br>lack of<br>sex,<br>racial, and<br>ethnic<br>diversity<br>in the<br>leadership<br>of<br>orthopaed<br>ic<br>societies.<br>It<br>emphasiz<br>ed the<br>need for<br>better<br>data<br>collection |

|  |  |  |  |  |                            |                                                                                                                                                                                                                                                      |                                                                |  |                                                                                                                                                                                                                                                            |
|--|--|--|--|--|----------------------------|------------------------------------------------------------------------------------------------------------------------------------------------------------------------------------------------------------------------------------------------------|----------------------------------------------------------------|--|------------------------------------------------------------------------------------------------------------------------------------------------------------------------------------------------------------------------------------------------------------|
|  |  |  |  |  | eting<br>the<br>surve<br>y | and<br>ethnic<br>compo<br>sition<br>of<br>society<br>memb<br>ers<br>and<br>board<br>memb<br>ers.<br>The<br>survey<br>was<br>sent<br>to<br>the<br>current<br>presid<br>ent<br>and<br>execut<br>ive<br>coordi<br>nator<br>of<br>each<br>society<br>and | measures<br>academic<br>productivity<br>and citation<br>impact |  | on these<br>demograp<br>hics to<br>track<br>improvem<br>ents in<br>diversity<br>and<br>highlighte<br>d that<br>while<br>academic<br>participati<br>on is a<br>factor in<br>leadership<br>selection,<br>other<br>elements<br>also play<br>a crucial<br>role |
|--|--|--|--|--|----------------------------|------------------------------------------------------------------------------------------------------------------------------------------------------------------------------------------------------------------------------------------------------|----------------------------------------------------------------|--|------------------------------------------------------------------------------------------------------------------------------------------------------------------------------------------------------------------------------------------------------------|

|                      |                                                                                                                |               |              |                                                                                                                            |                                                                                     |                                                                                    |                                                                                                                                    |                                                                                    |                                                                                                                                      |
|----------------------|----------------------------------------------------------------------------------------------------------------|---------------|--------------|----------------------------------------------------------------------------------------------------------------------------|-------------------------------------------------------------------------------------|------------------------------------------------------------------------------------|------------------------------------------------------------------------------------------------------------------------------------|------------------------------------------------------------------------------------|--------------------------------------------------------------------------------------------------------------------------------------|
|                      |                                                                                                                |               |              |                                                                                                                            |                                                                                     | remained open for four weeks, with reminders sent to encourage participation       |                                                                                                                                    |                                                                                    |                                                                                                                                      |
| 51. Sobel, 2023 (31) | Interpersonal Interactions and Biases in Orthopaedic Surgery Residency: Do Experiences Differ Based on Gender? | United States | survey study | The population includes residents in orthopaedic surgery from selected residency programs. The study specifically examines | A total of 94 residents responded to the survey, which represents 42% of the potent | The study utilized a survey distributed through program directors to ensure a high | Gender differences in perceived experiences during residency. The presence of women faculty and their interactions with residents. | - Academic/research opportunities<br>- Work-life balance<br>-Mental health impacts | The study concludes that while women residents are underrepresented in orthopaedic surgery, understanding their perceptions compared |

|  |  |  |  |                                                   |                                                                  |                                                                                                                                                                |                                                                                                                  |  |                                                                                                                                                                                                                                     |
|--|--|--|--|---------------------------------------------------|------------------------------------------------------------------|----------------------------------------------------------------------------------------------------------------------------------------------------------------|------------------------------------------------------------------------------------------------------------------|--|-------------------------------------------------------------------------------------------------------------------------------------------------------------------------------------------------------------------------------------|
|  |  |  |  | the experiences of both male and female residents | ial respondents (232 total residents) from 10 residency programs | response rate. The survey aimed to gather subjective perceptions of residents regarding their professional, social, and personal interactions during residency | Personal challenges faced by residents, such as balancing residency with personal life and feelings of isolation |  | to their counterparts can help improve recruitment and retention strategies. The findings indicate that subjective experiences significantly influence residents' interactions and overall residency satisfaction, highlighting the |
|--|--|--|--|---------------------------------------------------|------------------------------------------------------------------|----------------------------------------------------------------------------------------------------------------------------------------------------------------|------------------------------------------------------------------------------------------------------------------|--|-------------------------------------------------------------------------------------------------------------------------------------------------------------------------------------------------------------------------------------|

|                      |                                                                                                                                      |        |                   |                                                                             |                                                  |                                                                                                        |                                                                               |                        |                                                                                      |
|----------------------|--------------------------------------------------------------------------------------------------------------------------------------|--------|-------------------|-----------------------------------------------------------------------------|--------------------------------------------------|--------------------------------------------------------------------------------------------------------|-------------------------------------------------------------------------------|------------------------|--------------------------------------------------------------------------------------|
|                      |                                                                                                                                      |        |                   |                                                                             |                                                  | training. It also explored experiences of harassment or discrimination during pre residency interviews |                                                                               |                        | need for further exploration of gender biases in the field                           |
| 52. Hiemstra, 2019 3 | Dissecting disparity: improvements towards gender parity in leadership and on the podium within the Canadian Orthopaedic Association | Canada | Descriptive study | The study focuses on the membership of the Canadian Orthopaedic Association | The specific sample size is not mentioned in the | The study analyzes attendance and participation                                                        | Limited exposure to orthopaedics during medical training. A culture of gender | - Bias<br>- Mentorship | The study concludes that while there have been improvements in the representation of |

|  |  |  |  |                                                                                           |                                                                                                  |                                                                                                                                                                          |                                                                                                                                              |  |                                                                                                                                                                                                                                                                     |
|--|--|--|--|-------------------------------------------------------------------------------------------|--------------------------------------------------------------------------------------------------|--------------------------------------------------------------------------------------------------------------------------------------------------------------------------|----------------------------------------------------------------------------------------------------------------------------------------------|--|---------------------------------------------------------------------------------------------------------------------------------------------------------------------------------------------------------------------------------------------------------------------|
|  |  |  |  | <p>n (COA), particularly examining the representation of female orthopaedic surgeons.</p> | <p>provided contexts, but it includes data from various years and categories of COA members.</p> | <p>data from COA annual meetings over several years, assessing the percentage of women on the podium and in leadership roles. It also compares the representation of</p> | <p>bias and male chauvinism . Lack of female mentors and role models, which significantly impacts women's career choices in orthopaedics</p> |  | <p>women in the COA, particularly among trainees, there is still a significant gender gap in leadership roles and podium presence at meetings. It emphasizes the need for continued efforts to enhance female representation in orthopaedic surgery, suggesting</p> |
|--|--|--|--|-------------------------------------------------------------------------------------------|--------------------------------------------------------------------------------------------------|--------------------------------------------------------------------------------------------------------------------------------------------------------------------------|----------------------------------------------------------------------------------------------------------------------------------------------|--|---------------------------------------------------------------------------------------------------------------------------------------------------------------------------------------------------------------------------------------------------------------------|

|  |  |  |  |  |  |                                                                                                                                         |  |  |                                                                                                                                                                                                                                               |
|--|--|--|--|--|--|-----------------------------------------------------------------------------------------------------------------------------------------|--|--|-----------------------------------------------------------------------------------------------------------------------------------------------------------------------------------------------------------------------------------------------|
|  |  |  |  |  |  | women in orthopaedic surgery to other countries and surgical specialties, highlighting trends and disparities in gender representation. |  |  | g that increased visibility of women in leadership positions can foster collaboration and improve recognition for female surgeons<br>The authors call for further research and initiatives to track and promote gender diversity in orthopaed |
|--|--|--|--|--|--|-----------------------------------------------------------------------------------------------------------------------------------------|--|--|-----------------------------------------------------------------------------------------------------------------------------------------------------------------------------------------------------------------------------------------------|

|                       |                                                             |                                                                |                       |                                                                                                                                                                                                                |                                                                                                                                               |                                                                                                                                              |                                                                                                                                                                                                                              |                                   |                                                                                                                                                                                                                                      |
|-----------------------|-------------------------------------------------------------|----------------------------------------------------------------|-----------------------|----------------------------------------------------------------------------------------------------------------------------------------------------------------------------------------------------------------|-----------------------------------------------------------------------------------------------------------------------------------------------|----------------------------------------------------------------------------------------------------------------------------------------------|------------------------------------------------------------------------------------------------------------------------------------------------------------------------------------------------------------------------------|-----------------------------------|--------------------------------------------------------------------------------------------------------------------------------------------------------------------------------------------------------------------------------------|
|                       |                                                             |                                                                |                       |                                                                                                                                                                                                                |                                                                                                                                               |                                                                                                                                              |                                                                                                                                                                                                                              |                                   | ic surgery over time                                                                                                                                                                                                                 |
| 53. Vivekananda, 2023 | Gender Representation in Major Orthopaedic Surgery Meetings | United States, with additional references to Canada and Europe | quantitative analysis | The population includes faculty members who participated as speakers and moderators at 10 major orthopaedic surgery meetings held in 2021. The study specifically examines the gender distribution among these | The exact sample size is not specified in the provided contexts, but the study analyzes data from 10 major meetings, indicating a substantial | The study retrieved conference programs and details of faculty moderating or presenting at the selected meetings. It involved a quantitative | Gender of speakers and moderators. Subspecialty of the sessions (e.g., adult reconstruction, trauma, pediatrics). Academic qualifications of the faculty, including the number of publications and citations. Representation | - Academic/research opportunities | The study concluded that there is a significant gender disparity in orthopaedic surgery meetings, with a high proportion of male-only panels (58.5%) and low overall female representation (12.6%). It highlighted that subspecialty |

|  |  |  |  |              |                                     |                                                                                                                                                                  |  |  |                                                                                                                                                                                                                   |
|--|--|--|--|--------------|-------------------------------------|------------------------------------------------------------------------------------------------------------------------------------------------------------------|--|--|-------------------------------------------------------------------------------------------------------------------------------------------------------------------------------------------------------------------|
|  |  |  |  | participants | number of sessions and participants | assessment of the presence of female speakers and moderators, as well as the prevalence of male-only panels .<br>Data collected included the number of sessions, |  |  | ities like adult reconstruction had the highest male-only panels, while trauma and pediatrics had the least. Despite similar qualifications, men were more likely to hold higher academic ranks compared to women |
|--|--|--|--|--------------|-------------------------------------|------------------------------------------------------------------------------------------------------------------------------------------------------------------|--|--|-------------------------------------------------------------------------------------------------------------------------------------------------------------------------------------------------------------------|

|                   |                                                |               |                                  |                                                     |                                    |                                                                                                                        |                                                  |                  |                                                                |
|-------------------|------------------------------------------------|---------------|----------------------------------|-----------------------------------------------------|------------------------------------|------------------------------------------------------------------------------------------------------------------------|--------------------------------------------------|------------------|----------------------------------------------------------------|
|                   |                                                |               |                                  |                                                     |                                    | speaker details, and subspecialty topics, which were then analyzed using statistical methods such as ANOVA and t-tests |                                                  |                  |                                                                |
| 54. Payares, 2023 | The Current State of Diversity in Orthopaedics | United States | Review/Analysis of existing data | Orthopaedic surgeons and residents, with a focus on | Data from the 2018 census of 30,14 | The study utilizes a review of census                                                                                  | Representation, Attrition Rates, Support Systems | - Representation | The study concludes that orthopaedic surgery remains the least |

|  |  |  |  |                                              |                                                         |                                                                                                                                                                |  |  |                                                                                                                                                                                                                                                   |
|--|--|--|--|----------------------------------------------|---------------------------------------------------------|----------------------------------------------------------------------------------------------------------------------------------------------------------------|--|--|---------------------------------------------------------------------------------------------------------------------------------------------------------------------------------------------------------------------------------------------------|
|  |  |  |  | underrepresented minorities (URMs) and women | 1<br>orthopaedic surgeons and various residency reports | s data, reports from the Accreditation Council for Graduate Medical Education (ACGME), and previous studies to analyze trends in diversity and attrition rates |  |  | diverse specialty in medicine, with significant barriers to entry and retention for URMs and women. It stresses the importance of ongoing support and the establishment of effective pathways to improve diversity and inclusion within the field |
|--|--|--|--|----------------------------------------------|---------------------------------------------------------|----------------------------------------------------------------------------------------------------------------------------------------------------------------|--|--|---------------------------------------------------------------------------------------------------------------------------------------------------------------------------------------------------------------------------------------------------|

|                 |                                           |        |          |                         |                 |                             |                            |             |                                                                                                                                                                                                                  |
|-----------------|-------------------------------------------|--------|----------|-------------------------|-----------------|-----------------------------|----------------------------|-------------|------------------------------------------------------------------------------------------------------------------------------------------------------------------------------------------------------------------|
|                 |                                           |        |          |                         |                 | among orthopaedic residents |                            |             | The findings suggest that while there are slight improvements in representation, the overall progress is insufficient, and systemic changes are necessary to foster a more inclusive environment in orthopaedics |
| 55. Ramos, 2022 | Women in Leadership in State and Regional | United | based on | The population includes | The study had a | The study utilized          | The study examined factors | -Leadership | The study concluded that there                                                                                                                                                                                   |

|                       |         |             |                                                                                                                        |                                                                                                                                                          |                                                                                                                                                                |                                                                                                                                                                                                                                                                        |  |                                                                                                                                                                                                                                 |
|-----------------------|---------|-------------|------------------------------------------------------------------------------------------------------------------------|----------------------------------------------------------------------------------------------------------------------------------------------------------|----------------------------------------------------------------------------------------------------------------------------------------------------------------|------------------------------------------------------------------------------------------------------------------------------------------------------------------------------------------------------------------------------------------------------------------------|--|---------------------------------------------------------------------------------------------------------------------------------------------------------------------------------------------------------------------------------|
| Orthopaedic Societies | States. | survey data | executive directors of state and regional orthopaedic societies, as well as the female members within those societies. | sample size of 49 executive directors who responded to the survey, representing 51 state and four regional orthopaedic societies, which corresponds to a | web-based survey consisting of 14 questions aimed at gathering data on female membership composition, the percentage of male and female practicing orthopaedic | such as the percentage of female members in the societies, the presence of female presidents, and the representation of women on the Board of Directors. It also considered the overall low percentage of female orthopaedic surgeons, which affects female membership |  | is a positive correlation between the number of female members and the presence of women in leadership roles within state and regional orthopaedic societies. This suggests that increasing female representation could enhance |
|-----------------------|---------|-------------|------------------------------------------------------------------------------------------------------------------------|----------------------------------------------------------------------------------------------------------------------------------------------------------|----------------------------------------------------------------------------------------------------------------------------------------------------------------|------------------------------------------------------------------------------------------------------------------------------------------------------------------------------------------------------------------------------------------------------------------------|--|---------------------------------------------------------------------------------------------------------------------------------------------------------------------------------------------------------------------------------|

|  |  |  |  |  |                               |                                                                                                                                                                               |                                                           |  |                                                                                                                                                                                                                                                                           |
|--|--|--|--|--|-------------------------------|-------------------------------------------------------------------------------------------------------------------------------------------------------------------------------|-----------------------------------------------------------|--|---------------------------------------------------------------------------------------------------------------------------------------------------------------------------------------------------------------------------------------------------------------------------|
|  |  |  |  |  | <p>response rate of 89.1%</p> | <p>surgeons, and female representation on the Board of Directors of the societies</p> <p>The survey was anonymous, and no identifying information was collected, ensuring</p> | <p>participation in these societies</p> <p>Leadership</p> |  | <p>recruitment and retention of women in the field of orthopaedics</p> <p>However, it also highlighted that only a few societies had female presidents in the past decade, indicating a need for further efforts to increase gender diversity in leadership positions</p> |
|--|--|--|--|--|-------------------------------|-------------------------------------------------------------------------------------------------------------------------------------------------------------------------------|-----------------------------------------------------------|--|---------------------------------------------------------------------------------------------------------------------------------------------------------------------------------------------------------------------------------------------------------------------------|

|                            |                                                            |                          |                                   |                                                                                                                                                                                                                                                                                        |                                                                                                                                                                                                                  |                                                                                                                                                                                                                       |                                                                                                                                                                                                                                                                                                 |                                                                                           |                                                                                                                                                                                                                                                                                                                        |
|----------------------------|------------------------------------------------------------|--------------------------|-----------------------------------|----------------------------------------------------------------------------------------------------------------------------------------------------------------------------------------------------------------------------------------------------------------------------------------|------------------------------------------------------------------------------------------------------------------------------------------------------------------------------------------------------------------|-----------------------------------------------------------------------------------------------------------------------------------------------------------------------------------------------------------------------|-------------------------------------------------------------------------------------------------------------------------------------------------------------------------------------------------------------------------------------------------------------------------------------------------|-------------------------------------------------------------------------------------------|------------------------------------------------------------------------------------------------------------------------------------------------------------------------------------------------------------------------------------------------------------------------------------------------------------------------|
|                            |                                                            |                          |                                   |                                                                                                                                                                                                                                                                                        |                                                                                                                                                                                                                  | ng<br>confid<br>entialit<br>y                                                                                                                                                                                         |                                                                                                                                                                                                                                                                                                 |                                                                                           |                                                                                                                                                                                                                                                                                                                        |
| 56. Linscheid<br>, 2020 65 | Women in academic<br>surgery over the last<br>four decades | Unite<br>d<br>State<br>s | retrosp<br>ective<br>analysi<br>s | The<br>population<br>studied<br>includes<br>full-time<br>academic<br>faculty<br>physician<br>s across<br>multiple<br>surgical<br>specialtie<br>s,<br>including<br>OB/GYN,<br>general<br>surgery,<br>ophthalm<br>ology,<br>ENT,<br>plastic<br>surgery,<br>urology,<br>neurosurg<br>ery, | The<br>study<br>does<br>not<br>specif<br>y an<br>exact<br>sampl<br>e size<br>in the<br>provid<br>ed<br>conte<br>xts,<br>but it<br>includ<br>es<br>data<br>from<br>all<br>full-<br>time<br>acade<br>mic<br>facult | The<br>study<br>emplo<br>yed<br>descri<br>ptive<br>statisti<br>cs to<br>analyz<br>e the<br>percen<br>tage of<br>female<br>surgeo<br>ns<br>over<br>the<br>years.<br>Poisso<br>n<br>regres<br>sion<br>was<br>used<br>to | The<br>increasing<br>number of<br>female<br>medical<br>students<br>and<br>surgical<br>residents.<br>The<br>presence<br>of female<br>mentors<br>and role<br>models.<br>Work-life<br>balance<br>considerati<br>ons and<br>the appeal<br>of certain<br>specialties<br>like<br>OB/GYN,<br>which has | - Mentorship<br>- Work-life<br>balance<br><br>-<br>Academic/re<br>search<br>opportunities | The study<br>concludes<br>that while<br>the overall<br>number of<br>women in<br>academic<br>surgery is<br>increasing<br>, the rate<br>of<br>increase<br>varies<br>significan<br>tly across<br>different<br>surgical<br>specialties<br>. OB/GYN<br>shows the<br>most<br>substantia<br>l growth,<br>while<br>fields like |

|  |  |  |  |                                                        |                                                         |                                                                                                                                                                         |                                                     |  |                                                                                                                                                                                                                                   |
|--|--|--|--|--------------------------------------------------------|---------------------------------------------------------|-------------------------------------------------------------------------------------------------------------------------------------------------------------------------|-----------------------------------------------------|--|-----------------------------------------------------------------------------------------------------------------------------------------------------------------------------------------------------------------------------------|
|  |  |  |  | <p>orthopaedic surgery, and cardiothoracic surgery</p> | <p>y in the mentioned specialties from 1969 to 2018</p> | <p>examine the percentage of women in each field, with the year and specialty (using general surgery as a reference) as predictor variables<br/>Data were collected</p> | <p>a higher percentage of female representation</p> |  | <p>neurosurgery and orthopaedic surgery have slower rates of increase. The findings suggest that barriers still exist for women in pursuing academic surgical careers, including a lack of mentorship and gender stereotyping</p> |
|--|--|--|--|--------------------------------------------------------|---------------------------------------------------------|-------------------------------------------------------------------------------------------------------------------------------------------------------------------------|-----------------------------------------------------|--|-----------------------------------------------------------------------------------------------------------------------------------------------------------------------------------------------------------------------------------|

|                     |                                                                                                                  |               |                     |                                                                    |                                         |                                                                                                                        |                                                                                      |                                   |                                                                     |
|---------------------|------------------------------------------------------------------------------------------------------------------|---------------|---------------------|--------------------------------------------------------------------|-----------------------------------------|------------------------------------------------------------------------------------------------------------------------|--------------------------------------------------------------------------------------|-----------------------------------|---------------------------------------------------------------------|
|                     |                                                                                                                  |               |                     |                                                                    |                                         | ed from publicly available sources, and institutional review board exemption was granted due to the nature of the data |                                                                                      |                                   |                                                                     |
| 57. Levy, 2023 (32) | Effect of Faculty Diversity on Minority Student Populations Matching into Orthopaedic Surgery Residency Programs | United States | observational study | The population of interest includes orthopaedic residency programs | The study includes data from 172 orthop | The study employs a quantitative approach                                                                              | Proportion of female attendings and URiM attendings. Proportion of female residents, | -Academic/ research opportunities | The study concludes that residency programs with a higher represent |

|  |  |  |  |                                                                                                      |                                                                                                                |                                                                                                                                                                          |                                                                                     |  |                                                                                                                                                                                                                                                             |
|--|--|--|--|------------------------------------------------------------------------------------------------------|----------------------------------------------------------------------------------------------------------------|--------------------------------------------------------------------------------------------------------------------------------------------------------------------------|-------------------------------------------------------------------------------------|--|-------------------------------------------------------------------------------------------------------------------------------------------------------------------------------------------------------------------------------------------------------------|
|  |  |  |  | <p>across the United States, specifically focusing on the demographics of faculty and residents.</p> | <p>Orthopedic residency programs, with specific demographic data reported from varying numbers of programs</p> | <p>using the American Orthopedic Association's Orthopedic Residency Information Network (ORIN) database to extract demographic data. Statistical analyses, including</p> | <p>URiM residents, and international medical graduates (IMGs) among the Faculty</p> |  | <p>ation of female and URiM faculty are more likely to have a corresponding increase in female and URiM residents. However, it also notes that while URiM faculty representation positively influences URiM resident matching, female faculty represent</p> |
|--|--|--|--|------------------------------------------------------------------------------------------------------|----------------------------------------------------------------------------------------------------------------|--------------------------------------------------------------------------------------------------------------------------------------------------------------------------|-------------------------------------------------------------------------------------|--|-------------------------------------------------------------------------------------------------------------------------------------------------------------------------------------------------------------------------------------------------------------|

|  |  |  |  |  |  |                                                                                                                                                                                                                                                                                          |  |  |                                                                                                                                                                                                                                                                                                                                                        |
|--|--|--|--|--|--|------------------------------------------------------------------------------------------------------------------------------------------------------------------------------------------------------------------------------------------------------------------------------------------|--|--|--------------------------------------------------------------------------------------------------------------------------------------------------------------------------------------------------------------------------------------------------------------------------------------------------------------------------------------------------------|
|  |  |  |  |  |  | <p>ng<br/>bivaria<br/>te<br/>linear<br/>regres<br/>sion,<br/>were<br/>perfor<br/>med to<br/>assess<br/>the<br/>relatio<br/>nship<br/>betwe<br/>en the<br/>propor<br/>tion of<br/>female<br/>or<br/>URiM<br/>faculty<br/>and<br/>the<br/>demog<br/>raphic<br/>s of<br/>reside<br/>nts</p> |  |  | <p>ation does<br/>not<br/>significantl<br/>y affect<br/>the<br/>matching<br/>of URiM<br/>applicants<br/>This<br/>suggests<br/>that while<br/>diversity<br/>in faculty<br/>can<br/>enhance<br/>the<br/>likelihood<br/>of<br/>matching<br/>diverse<br/>residents,<br/>the<br/>dynamics<br/>may differ<br/>based on<br/>the<br/>specific<br/>demograp</p> |
|--|--|--|--|--|--|------------------------------------------------------------------------------------------------------------------------------------------------------------------------------------------------------------------------------------------------------------------------------------------|--|--|--------------------------------------------------------------------------------------------------------------------------------------------------------------------------------------------------------------------------------------------------------------------------------------------------------------------------------------------------------|

|                  |                                                                                                                                                               |                |                                |                                                                                                                                        |                                                                                         |                                                                                    |                                                                                                                                        |                  |                                                                                                                                  |
|------------------|---------------------------------------------------------------------------------------------------------------------------------------------------------------|----------------|--------------------------------|----------------------------------------------------------------------------------------------------------------------------------------|-----------------------------------------------------------------------------------------|------------------------------------------------------------------------------------|----------------------------------------------------------------------------------------------------------------------------------------|------------------|----------------------------------------------------------------------------------------------------------------------------------|
|                  |                                                                                                                                                               |                |                                |                                                                                                                                        |                                                                                         | A p-value of < 0.05 was set as the threshold for statistical significance          |                                                                                                                                        |                  | hic groups involved.                                                                                                             |
| 58. Rajani, 2019 | Geographic Differences in Sex and Racial Distributions Among Orthopaedic Surgery Residencies: Programs in the South Less Likely to Train Women and Minorities | United States. | secondary data analysis study. | The population consists of active residents within orthopaedic surgery residency programs across the United States during the academic | The specific sample size is not mentioned in the provided contexts, but it includes all | The study utilized data obtained from the American Medical Association. Geographic | The study aimed to explore geographic differences in the representation of women and minorities in orthopaedic surgery residencies. It | - Representation | The study concluded that there are significant geographic differences in the representation of women and minorities in orthopaed |

|  |  |  |  |                   |                                          |                                                                                                                                                                  |                                                                                                                                                                                                                                                            |  |                                                                                                                                                                                                                                                                 |
|--|--|--|--|-------------------|------------------------------------------|------------------------------------------------------------------------------------------------------------------------------------------------------------------|------------------------------------------------------------------------------------------------------------------------------------------------------------------------------------------------------------------------------------------------------------|--|-----------------------------------------------------------------------------------------------------------------------------------------------------------------------------------------------------------------------------------------------------------------|
|  |  |  |  | year 2013 to 2014 | active residents in accredited programs. | regions were categorized according to the US census method into Northeast, Midwest, South, and West. Descriptive statistics were employed to calculate frequency | considered both applicant-related factors (interest of female and minority candidates in Southern programs) and program-related factors (consideration given to these candidates by Southern programs) as potential influences on the observed disparities |  | ic surgery residency programs. Specifically, programs in the South are less likely to train women and minorities compared to those in the West and Northeast. This underrepresentation highlights the need for further investigation into the barriers faced by |
|--|--|--|--|-------------------|------------------------------------------|------------------------------------------------------------------------------------------------------------------------------------------------------------------|------------------------------------------------------------------------------------------------------------------------------------------------------------------------------------------------------------------------------------------------------------|--|-----------------------------------------------------------------------------------------------------------------------------------------------------------------------------------------------------------------------------------------------------------------|

|                       |                          |          |             |                |           |                                                                                                                                                           |                    |                 |                                                          |
|-----------------------|--------------------------|----------|-------------|----------------|-----------|-----------------------------------------------------------------------------------------------------------------------------------------------------------|--------------------|-----------------|----------------------------------------------------------|
|                       |                          |          |             |                |           | counts and percentages. Chi-square tests were used to determine differences between group proportions, with statistical significance set at $P \leq 0.05$ |                    |                 | these groups in entering orthopaedic surgery residencies |
| 59. Incoll, 2019 (22) | Diversity in Orthopaedic | multiple | qualitative | The population | The exact | The study                                                                                                                                                 | Gender representat | Representati on | The study concludes                                      |

|                                                    |                  |                   |                                                                                                                             |                                     |                                                                                                                                                                        |                                                                                                                                                                                                                                                                               |  |                                                                                                                                                                                                                                                                |
|----------------------------------------------------|------------------|-------------------|-----------------------------------------------------------------------------------------------------------------------------|-------------------------------------|------------------------------------------------------------------------------------------------------------------------------------------------------------------------|-------------------------------------------------------------------------------------------------------------------------------------------------------------------------------------------------------------------------------------------------------------------------------|--|----------------------------------------------------------------------------------------------------------------------------------------------------------------------------------------------------------------------------------------------------------------|
| <p>Surgery:<br/>International<br/>Perspectives</p> | <p>countries</p> | <p>assessment</p> | <p>includes orthopaedic trainees and practicing surgeons, with a focus on gender and ethnic diversity within the field.</p> | <p>sample size is not specified</p> | <p>employs a comparative analysis of diversity metrics across different countries, examining trends in gender and ethnic representation in orthopaedic surgery. It</p> | <p>ion in orthopaedic training programs, with specific statistics from Canada and New Zealand indicating low female participation rates (e.g., 26.7% in Canada for PGY-1 residents) The overall percentage of women in orthopaedic surgery, which has increased from 2.5%</p> |  | <p>that despite improvements in medical school diversity, orthopaedic surgery continues to struggle with low representation of women and minorities. There is a growing awareness of these disparities, but significant work remains to be done to enhance</p> |
|----------------------------------------------------|------------------|-------------------|-----------------------------------------------------------------------------------------------------------------------------|-------------------------------------|------------------------------------------------------------------------------------------------------------------------------------------------------------------------|-------------------------------------------------------------------------------------------------------------------------------------------------------------------------------------------------------------------------------------------------------------------------------|--|----------------------------------------------------------------------------------------------------------------------------------------------------------------------------------------------------------------------------------------------------------------|

|                      |                                                                   |     |                |                                           |               |                                                                                                                 |                                                                                                                                                                                                     |                              |                                                                       |
|----------------------|-------------------------------------------------------------------|-----|----------------|-------------------------------------------|---------------|-----------------------------------------------------------------------------------------------------------------|-----------------------------------------------------------------------------------------------------------------------------------------------------------------------------------------------------|------------------------------|-----------------------------------------------------------------------|
|                      |                                                                   |     |                |                                           |               | draws on historical data and current statistics to assess changes over time and identify areas for improvement. | in 1995 to 12.2% in 2018 in Canada<br>The comparison of diversity in orthopaedics versus other surgical specialties, highlighting that orthopaedics lags behind in both gender and ethnic diversity |                              | diversity in orthopaedic training programs and the workforce globally |
| 60. Compton, 2021 62 | Pregnancy and Parental Leave During Orthopaedic Surgery Residency | USA | Review article | Orthopaedic surgery residents and faculty | Not specified | Literature review and policy analyses                                                                           | Lack of standardized parental leave policies; health concerns                                                                                                                                       | -Fertility/parenthood issues | Parental leave policies in orthopedic surgery are inconsiste          |

|                     |                                               |     |                        |                                          |     |                                |                                                |                   |                                                                                                                                                                                |
|---------------------|-----------------------------------------------|-----|------------------------|------------------------------------------|-----|--------------------------------|------------------------------------------------|-------------------|--------------------------------------------------------------------------------------------------------------------------------------------------------------------------------|
|                     |                                               |     |                        |                                          |     |                                | during residency; stigma around parental leave |                   | nt and often inadequate. Improved transparency, standardized policies, and support for trainees are needed to enhance recruitment and retention of female orthopedic surgeons. |
| 61. Dineen, 2019 56 | Gender Preferences of Patients When Selecting | USA | Cross-sectional survey | New patients in the Emergency Department | 191 | Patients completed a 22-questi | - High rate of incomplete surveys (49.2%)      | -Patient's choice | The majority of patients did not have a gender                                                                                                                                 |

|                              |  |  |                                              |  |                                                                                                                                                                 |                                                                                                                                                               |  |                                                                                                                                                                                                                               |
|------------------------------|--|--|----------------------------------------------|--|-----------------------------------------------------------------------------------------------------------------------------------------------------------------|---------------------------------------------------------------------------------------------------------------------------------------------------------------|--|-------------------------------------------------------------------------------------------------------------------------------------------------------------------------------------------------------------------------------|
| <p>Orthopaedic Providers</p> |  |  | <p>nt and orthopaedic urgent care clinic</p> |  | <p>on survey regarding gender preference and traits of orthopaedic providers. Data analysis included Pearson's chi-square test, Fisher's t-test, and linear</p> | <p>- Sample population largely female, Caucasian, and highly educated<br/> - No formal power analysis performed<br/> - Potential social desirability bias</p> |  | <p>preference for their orthopaedic surgeon. When preferences were expressed, females were preferred. Patient preferences varied by subspecialty, suggesting that increasing gender diversity in orthopaedics is crucial.</p> |
|------------------------------|--|--|----------------------------------------------|--|-----------------------------------------------------------------------------------------------------------------------------------------------------------------|---------------------------------------------------------------------------------------------------------------------------------------------------------------|--|-------------------------------------------------------------------------------------------------------------------------------------------------------------------------------------------------------------------------------|

|                  |                                                                                                                                                             |     |                       |                                 |                                                                                       |                                                                                                    |                                                                                                                                                                                                                                                                                                                    |                                                                                                                   |                                                                                                                                                                                                                                      |
|------------------|-------------------------------------------------------------------------------------------------------------------------------------------------------------|-----|-----------------------|---------------------------------|---------------------------------------------------------------------------------------|----------------------------------------------------------------------------------------------------|--------------------------------------------------------------------------------------------------------------------------------------------------------------------------------------------------------------------------------------------------------------------------------------------------------------------|-------------------------------------------------------------------------------------------------------------------|--------------------------------------------------------------------------------------------------------------------------------------------------------------------------------------------------------------------------------------|
|                  |                                                                                                                                                             |     |                       |                                 |                                                                                       | regression.                                                                                        |                                                                                                                                                                                                                                                                                                                    |                                                                                                                   |                                                                                                                                                                                                                                      |
| 62. Munger, 2019 | Revisiting the Gender Gap in Orthopaedic Surgery: Investigating the Relationship Between Orthopaedic Surgery Female Faculty and Female Residency Applicants | USA | Cross-sectional study | U.S. allopathic medical schools | 101 medical schools (from a total of 125 initially, excluding 24 for incomplete data) | Analysis of data from the Association of American Medical Colleges (AAMC) for the years 2005-2014. | <ul style="list-style-type: none"> <li>- Exclusion of international and osteopathic medical schools.</li> <li>- Data limitations due to de-identification and lack of tracking specific school factors.</li> <li>- Small sample size of female applicants per institution leading to potential year-to-</li> </ul> | <ul style="list-style-type: none"> <li>- Academic/research opportunities</li> <li>- Recruitment effort</li> </ul> | No significant correlation was found between the number of female orthopaedic surgery faculty and the number of female residency applicants. The study highlights the complex nature of recruitment and suggests that other factors, |

|                 |                                                                                      |     |                        |                                                       |                                          |                                       |                                                      |                                  |                                                                                                                                                                                         |
|-----------------|--------------------------------------------------------------------------------------|-----|------------------------|-------------------------------------------------------|------------------------------------------|---------------------------------------|------------------------------------------------------|----------------------------------|-----------------------------------------------------------------------------------------------------------------------------------------------------------------------------------------|
|                 |                                                                                      |     |                        |                                                       |                                          |                                       | year variation.                                      |                                  | beyond the presence of female faculty, influence female medical students' interest in orthopaedic surgery. More research is needed to explore additional factors affecting recruitment. |
| 63. Table, 2023 | AOA Critical Issues: Perceptions on the State of Diversity, Equity, and Inclusion in | USA | Cross-sectional survey | Members of the American Orthopaedic Association (AOA) | 1,657 AOA members surveyed; 262 response | - Anonymous 11-question online survey | - Low response rate (15.8%)<br>- Self-selection bias | - Mentorship<br>- Representation | - Positive attitudes towards DEI in orthopaedics despite existing                                                                                                                       |

|                     |                                                                 |        |               |                                            |                             |                                                                                                                                                                                                     |                                                                                                                                                                |            |                                                                                                                                                                                                    |
|---------------------|-----------------------------------------------------------------|--------|---------------|--------------------------------------------|-----------------------------|-----------------------------------------------------------------------------------------------------------------------------------------------------------------------------------------------------|----------------------------------------------------------------------------------------------------------------------------------------------------------------|------------|----------------------------------------------------------------------------------------------------------------------------------------------------------------------------------------------------|
|                     | Orthopaedic Surgery                                             |        |               |                                            | nses (15.8 % response rate) | <ul style="list-style-type: none"> <li>- Both free-response and multiple-choice questions</li> <li>- Data collected using Survey Monkey</li> <li>- Quantitative and qualitative analysis</li> </ul> | <ul style="list-style-type: none"> <li>- Diversity of responses on DEI perspectives</li> <li>- Some resistance to DEI initiatives among respondents</li> </ul> |            | <p>inequalities.</p> <ul style="list-style-type: none"> <li>- Action needed through mentorship, objective evaluation, transparency, and intentional action to improve DEI in the field.</li> </ul> |
| 64. Dossa , 2019 54 | Sex-Based Disparities in the Hourly Earnings of Surgeons in the | Canada | Cross-section | Surgeons who submitted claims for surgical | 3,275 surgeons              | Analysis of administrative                                                                                                                                                                          | Adjustments for specialty; matching surgeons                                                                                                                   | -Equal pay | Even within a fee-for-service system,                                                                                                                                                              |

|                       |                                                                           |     |                        |                                                                      |                                                                    |                                                                     |                                                                                                                                             |                              |                                                                                                                                 |
|-----------------------|---------------------------------------------------------------------------|-----|------------------------|----------------------------------------------------------------------|--------------------------------------------------------------------|---------------------------------------------------------------------|---------------------------------------------------------------------------------------------------------------------------------------------|------------------------------|---------------------------------------------------------------------------------------------------------------------------------|
|                       | Fee-for-Service System in Ontario, Canada                                 |     |                        | procedures from January 1, 2014, to December 31, 2016, in Ontario    |                                                                    | databases; matched analysis for specialty and years in practice     | on practice years and specialty to reduce bias; limitations in capturing all procedural details equal pay                                   |                              | female surgeons earn less per hour than male surgeons, suggesting systemic disparities in opportunity and procedure allocation. |
| 65. Hamilton, 2012 61 | Childbearing and Pregnancy Characteristics of Female Orthopaedic Surgeons | USA | Cross-sectional survey | Female surgeons in various specialties, with a focus on orthopaedics | 1,021 female surgeons surveyed; 223 were orthopaedic surgeons with | - Anonymous, voluntary, 199-item online survey<br>- Distributed via | - Reliance on survey responses and interest groups for distribution.<br>- Potential recall bias and variations in obstetric care over time. | -Fertility/parenthood issues | Female orthopaedic surgeons experience higher rates of pregnancy complications                                                  |

|  |  |  |  |  |                          |                                                                                                               |  |  |                                                                                                                                                                                |
|--|--|--|--|--|--------------------------|---------------------------------------------------------------------------------------------------------------|--|--|--------------------------------------------------------------------------------------------------------------------------------------------------------------------------------|
|  |  |  |  |  | 263 pregnancies reported | surgeon interest groups and word of mouth. - Data compared with American Pregnancy Association national data. |  |  | ations, including preterm delivery, compared to the general U.S. population. High work hours correlate with increased risks. Shorter maternity leave and breastfeeding duratio |
|--|--|--|--|--|--------------------------|---------------------------------------------------------------------------------------------------------------|--|--|--------------------------------------------------------------------------------------------------------------------------------------------------------------------------------|

|                      |                                                       |     |                           |                             |                                                             |                                                         |                                                                                                                                                           |                                                                                |                                                                                                                                              |
|----------------------|-------------------------------------------------------|-----|---------------------------|-----------------------------|-------------------------------------------------------------|---------------------------------------------------------|-----------------------------------------------------------------------------------------------------------------------------------------------------------|--------------------------------------------------------------------------------|----------------------------------------------------------------------------------------------------------------------------------------------|
|                      |                                                       |     |                           |                             |                                                             |                                                         |                                                                                                                                                           |                                                                                | ns during training compared to clinical practice were noted.                                                                                 |
| 66. Chou , 2023 (40) | Health Considerations for Female Orthopaedic Surgeons | USA | Review and survey studies | Female orthopaedic surgeons | Ranges from 63 to 1,203 participants across various studies | Surveys, cross-sectional studies, and follow-up studies | - Selection bias in survey responses<br>- Inconsistent reporting of gender demographics<br>- Small sample sizes in some studies<br>- Variability in study | - Radiation/cancer<br>- Fertility/parenthood issues<br>- Occupational injuries | Female orthopaedic surgeons face increased risks for breast cancer, fertility issues, pregnancy complications, and musculoskeletal injuries. |

|                      |                                                                                  |     |        |                                          |                                     |                                   |                                                             |                                         |                                                                                                                                                                                       |
|----------------------|----------------------------------------------------------------------------------|-----|--------|------------------------------------------|-------------------------------------|-----------------------------------|-------------------------------------------------------------|-----------------------------------------|---------------------------------------------------------------------------------------------------------------------------------------------------------------------------------------|
|                      |                                                                                  |     |        |                                          |                                     |                                   | design and focus                                            |                                         | There is a need for increased awareness, education, and preventive measures to support their health and well-being. Further research is required to address these issues effectively. |
| 67. Summers, 2020 64 | Closing the Gender Gap: Barriers to Success for Recruitment and Retention of the | USA | Review | female medical students and residents in | Not specified (review of literature | Literature review and analysis of | -Male-dominated "jock" culture<br>-Gender bias in residency | - Representation<br>-Recruitment effort | Addressing barriers such as culture, bias, and lack of support                                                                                                                        |

|                   |                                                                  |               |                             |                                                                   |                                              |                                                 |                                                                                                                                   |                                                                     |                                                                                                                                                                                   |
|-------------------|------------------------------------------------------------------|---------------|-----------------------------|-------------------------------------------------------------------|----------------------------------------------|-------------------------------------------------|-----------------------------------------------------------------------------------------------------------------------------------|---------------------------------------------------------------------|-----------------------------------------------------------------------------------------------------------------------------------------------------------------------------------|
|                   | Female Orthopaedic Surgery Applicant                             |               |                             | orthopaedic surgery                                               | and data)                                    | existing data                                   | applications<br>-Pregnancy and lifestyle concerns<br>-Limited mentors and role models<br>- Lack of early exposure to orthopaedics | -Fertility/ Parenthood issues<br>-Work-life balance<br>- Mentorship | can help close the gender gap and improve female representation in orthopaedic surgery. Organizations and initiatives are working towards this goal, but more efforts are needed. |
| 68. Poon, 2020 60 | Does a Career in Orthopaedic Surgery Affect a Woman's Fertility? | United States | survey-based research study | The population targeted in this study includes female orthopaedic | he study collected responses from 801 female | An anonymous 168-item survey was distributed to | age, specialty, length of delay in childbearing, and average hours worked                                                         | -Fertility/ parenthood issues                                       | The study found that over two-thirds of female orthopaedic surgeons intentional                                                                                                   |

|  |  |  |  |              |                        |                                                                                                                                                                        |                                          |  |                                                                                                                                                                                                                                                                     |
|--|--|--|--|--------------|------------------------|------------------------------------------------------------------------------------------------------------------------------------------------------------------------|------------------------------------------|--|---------------------------------------------------------------------------------------------------------------------------------------------------------------------------------------------------------------------------------------------------------------------|
|  |  |  |  | ic surgeons. | e orthopaedic surgeons | gather data on family planning, fertility, and pregnancy experiences among female orthopaedic surgeons. Statistical analysis was performed using Stata 15, and multipl | weekly in relation to fertility outcomes |  | ly delay childbearing due to their careers, resulting in having children at an older age than the general cohort. There was no significant association between career stage, hours worked, or subspecialty with decreased fertility or increased risk of pregnancy. |
|--|--|--|--|--------------|------------------------|------------------------------------------------------------------------------------------------------------------------------------------------------------------------|------------------------------------------|--|---------------------------------------------------------------------------------------------------------------------------------------------------------------------------------------------------------------------------------------------------------------------|

|  |  |  |  |  |  |                                                                                                                                                                                                                                                                                                 |  |  |                                                                                                                                                                                                         |
|--|--|--|--|--|--|-------------------------------------------------------------------------------------------------------------------------------------------------------------------------------------------------------------------------------------------------------------------------------------------------|--|--|---------------------------------------------------------------------------------------------------------------------------------------------------------------------------------------------------------|
|  |  |  |  |  |  | <p>e<br/>logistic<br/>regres<br/>sion<br/>was<br/>used<br/>to<br/>analyz<br/>e the<br/>relatio<br/>nship<br/>betwe<br/>en the<br/>numbe<br/>r of<br/>childre<br/>n per<br/>surgeo<br/>n and<br/>demog<br/>raphic<br/>factors<br/>such<br/>as<br/>age,<br/>special<br/>ty,<br/>length<br/>of</p> |  |  | <p>complicati<br/>ons<br/>The study<br/>provides<br/>updated<br/>informatio<br/>n to help<br/>guide<br/>female<br/>orthopaed<br/>ic<br/>surgeons<br/>in their<br/>family<br/>planning<br/>decisions</p> |
|--|--|--|--|--|--|-------------------------------------------------------------------------------------------------------------------------------------------------------------------------------------------------------------------------------------------------------------------------------------------------|--|--|---------------------------------------------------------------------------------------------------------------------------------------------------------------------------------------------------------|

|                |                                                                                    |               |                     |                                                                                                                                                                                     |                                                                                                               |                                                                                                     |                                                                                                                                                                                        |                     |                                                                                                                                                                                      |
|----------------|------------------------------------------------------------------------------------|---------------|---------------------|-------------------------------------------------------------------------------------------------------------------------------------------------------------------------------------|---------------------------------------------------------------------------------------------------------------|-----------------------------------------------------------------------------------------------------|----------------------------------------------------------------------------------------------------------------------------------------------------------------------------------------|---------------------|--------------------------------------------------------------------------------------------------------------------------------------------------------------------------------------|
|                |                                                                                    |               |                     |                                                                                                                                                                                     |                                                                                                               | delay, and average hours worked weekly                                                              |                                                                                                                                                                                        |                     |                                                                                                                                                                                      |
| 69. Poon, 2019 | Current Trends in Sex, Race, and Ethnic Diversity in Orthopaedic Surgery Residency | United States | observational study | population includes residents in eight primary surgical specialties, including orthopaedic surgery, general surgery, urology, ophthalmology, neurosurgery, obstetrics and gynecolog | The exact sample size is not specified in the provided contexts. However, the study analyzes data from multip | Data was collected from the National Graduate Medical Education Census through GME Track, sponsored | The study analyzed racial and ethnic diversity, focusing on groups such as African American, Asian, American Indian/Alaskan Native, Native Hawaiian/Pacific Islander, and multiracial/ | -Recruitment effort | the study concluded that recruitment efforts have not reversed the sex, racial, and ethnic disparities in orthopaedic residents. Orthopaedics has the lowest representation of women |

|  |  |  |  |                                                            |                                                                                                                        |                                                                                                                                                                                                                                                                                     |                                                                                                                                                             |  |                                                                                                                                                                                                                                                                                                                                                       |
|--|--|--|--|------------------------------------------------------------|------------------------------------------------------------------------------------------------------------------------|-------------------------------------------------------------------------------------------------------------------------------------------------------------------------------------------------------------------------------------------------------------------------------------|-------------------------------------------------------------------------------------------------------------------------------------------------------------|--|-------------------------------------------------------------------------------------------------------------------------------------------------------------------------------------------------------------------------------------------------------------------------------------------------------------------------------------------------------|
|  |  |  |  | <p>y,<br/>otolaryngology, and<br/>thoracic<br/>surgery</p> | <p>le<br/>years<br/>(2006<br/>-<br/>2015)<br/>acros<br/>s<br/>sever<br/>al<br/>surgic<br/>al<br/>speci<br/>alties.</p> | <p>by the<br/>Americ<br/>an<br/>Medic<br/>al<br/>Associ<br/>ation<br/>and<br/>the<br/>AAMC<br/>Linear<br/>regres<br/>sion<br/>model<br/>s were<br/>used<br/>to<br/>estima<br/>te<br/>trends<br/>in<br/>diversi<br/>ty<br/>among<br/>orthop<br/>aedic<br/>reside<br/>nts<br/>and</p> | <p>other/unkn<br/>own<br/>It also<br/>considered<br/>sex<br/>distribution,<br/>particularly<br/>the<br/>representat<br/>ion of<br/>female<br/>residents</p> |  | <p>and<br/>minorities<br/>among<br/>the<br/>residencie<br/>s studied<br/>Despite<br/>an<br/>increase<br/>in the<br/>represent<br/>ation of<br/>women<br/>and<br/>certain<br/>minority<br/>groups,<br/>orthopaed<br/>ic surgery<br/>continues<br/>to lag<br/>behind<br/>other<br/>surgical<br/>subspecia<br/>lities in<br/>terms of<br/>ethnic and</p> |
|--|--|--|--|------------------------------------------------------------|------------------------------------------------------------------------------------------------------------------------|-------------------------------------------------------------------------------------------------------------------------------------------------------------------------------------------------------------------------------------------------------------------------------------|-------------------------------------------------------------------------------------------------------------------------------------------------------------|--|-------------------------------------------------------------------------------------------------------------------------------------------------------------------------------------------------------------------------------------------------------------------------------------------------------------------------------------------------------|

|  |  |  |  |  |                                                                                                                                                     |  |  |               |
|--|--|--|--|--|-----------------------------------------------------------------------------------------------------------------------------------------------------|--|--|---------------|
|  |  |  |  |  | other surgical specialties<br>A mixed model analysis of variance was used to compare rates of diversification among different specialties over time |  |  | sex diversity |
|--|--|--|--|--|-----------------------------------------------------------------------------------------------------------------------------------------------------|--|--|---------------|

|                  |                                                                                             |           |                        |                                                                                          |               |                                                                                                                                                                     |                                                                                                                                                                                            |                     |                                                                                                                                                                                                                                                           |
|------------------|---------------------------------------------------------------------------------------------|-----------|------------------------|------------------------------------------------------------------------------------------|---------------|---------------------------------------------------------------------------------------------------------------------------------------------------------------------|--------------------------------------------------------------------------------------------------------------------------------------------------------------------------------------------|---------------------|-----------------------------------------------------------------------------------------------------------------------------------------------------------------------------------------------------------------------------------------------------------|
| 70. Incoll, 2021 | Gender associations with selection into Australian Orthopaedic Surgical Training: 2007–2019 | Australia | observational analyses | The study focuses on applicants to the Australian Orthopaedic Surgical Training program. | not specified | The study analyzed CV scores, referee reports, and performance in multiple mini-interviews (MMI) from 2007 to 2019. The proportion of each gender offered interview | Gender differences in CV scores, interview invitations, and interview performance. The gender composition of interview panels, which changed over the years to include more female members | -Recruitment effort | The study identified systemic gender bias in the selection process, with male applicants generally scoring higher on CVs and being invited to interviews more often than females. It suggests the need for medical specialties to examine their selection |
|------------------|---------------------------------------------------------------------------------------------|-----------|------------------------|------------------------------------------------------------------------------------------|---------------|---------------------------------------------------------------------------------------------------------------------------------------------------------------------|--------------------------------------------------------------------------------------------------------------------------------------------------------------------------------------------|---------------------|-----------------------------------------------------------------------------------------------------------------------------------------------------------------------------------------------------------------------------------------------------------|

|  |  |  |  |  |  |                                                                                                                                                                   |  |  |                                                                                                                                 |
|--|--|--|--|--|--|-------------------------------------------------------------------------------------------------------------------------------------------------------------------|--|--|---------------------------------------------------------------------------------------------------------------------------------|
|  |  |  |  |  |  | <p>ews was compared using Wilcoxon's rank sum test. Interview scores were converted to a percentage of the maximum possible score and tested for significance</p> |  |  | <p>processes for gender-based biases and to explore more valid and reliable selection tools to identify the best candidates</p> |
|--|--|--|--|--|--|-------------------------------------------------------------------------------------------------------------------------------------------------------------------|--|--|---------------------------------------------------------------------------------------------------------------------------------|

|                       |                                                                                                                                  |                |                    |                                                                                                                       |                                                                                                  |                                                                                                             |                                                                                                                     |        |                                                                                                                                                                              |
|-----------------------|----------------------------------------------------------------------------------------------------------------------------------|----------------|--------------------|-----------------------------------------------------------------------------------------------------------------------|--------------------------------------------------------------------------------------------------|-------------------------------------------------------------------------------------------------------------|---------------------------------------------------------------------------------------------------------------------|--------|------------------------------------------------------------------------------------------------------------------------------------------------------------------------------|
|                       |                                                                                                                                  |                |                    |                                                                                                                       |                                                                                                  | ance using an independent sample two-tailed t-test                                                          |                                                                                                                     |        |                                                                                                                                                                              |
| 71. <u>Hull, 2022</u> | Women in Surgery Events Alone do not Change Medical Student Perceptions of Gender Bias and Discrimination in Orthopaedic Surgery | United Kingdom | survey-based study | The study population includes medical students and early post-graduate trainees interested in trauma and orthopaedics | Pre-event questionnaires were completed by 102 participants, and post-event questionnaires by 52 | The study involved an event with presentations and interactive sessions from female T&O trainees, conducted | Geographic Direct exposure orthopaedic stereotype, male-dominated workplace culture, and lack of female role models | - Bias | The study concluded that significant concerns exist among medical students regarding gender-based discrimination within T&O. These perceptions were not altered by attending |

|  |  |  |  |  |                                                                                                                                                                  |  |  |                                                                                                                                                     |
|--|--|--|--|--|------------------------------------------------------------------------------------------------------------------------------------------------------------------|--|--|-----------------------------------------------------------------------------------------------------------------------------------------------------|
|  |  |  |  |  | participated online. Attendees completed pre and post-event questionnaires distributed via Facebook and email. The survey included questions on exposure to T&O, |  |  | a one-off women in T&O event. Early exposure to T&O is important to improve interest in orthopaedics, while negative stereotyping remains a barrier |
|--|--|--|--|--|------------------------------------------------------------------------------------------------------------------------------------------------------------------|--|--|-----------------------------------------------------------------------------------------------------------------------------------------------------|

|                |                                                                     |               |                    |                                                                 |                                        |                                                                                                                    |                                                                              |                        |                                                                         |
|----------------|---------------------------------------------------------------------|---------------|--------------------|-----------------------------------------------------------------|----------------------------------------|--------------------------------------------------------------------------------------------------------------------|------------------------------------------------------------------------------|------------------------|-------------------------------------------------------------------------|
|                |                                                                     |               |                    |                                                                 |                                        | perceptions of gender imbalances, and barriers preventing women from entering T&O, using a five-point Likert scale |                                                                              |                        |                                                                         |
| 72. Chou, 2012 | Increased Breast Cancer Prevalence Among Female Orthopedic Surgeons | United States | survey-based study | The study focuses on female orthopedic surgeons who are members | The sample size consists of 505 female | The study used a survey method, where a                                                                            | The study examined various breast cancer risk factors, including reproductiv | -Radiation/cancer risk | The study concluded that female orthopedic surgeons have a significantl |

|  |  |  |  |              |                                                    |                                                                                                                                                                        |                                                                                                                                                                 |  |                                                                                                                                                                                                                                 |
|--|--|--|--|--------------|----------------------------------------------------|------------------------------------------------------------------------------------------------------------------------------------------------------------------------|-----------------------------------------------------------------------------------------------------------------------------------------------------------------|--|---------------------------------------------------------------------------------------------------------------------------------------------------------------------------------------------------------------------------------|
|  |  |  |  | of the AAOS. | orthopedic surgeons who participated in the survey | questionnaire was mailed to eligible participants. The survey collected data on cancer diagnoses, breast cancer risk factors, and clinical practice details, including | history, hormone use, and lifestyle factors such as alcohol consumption and BMI. Occupational exposure to radiation through fluoroscopy use was also considered |  | higher prevalence of breast cancer compared to the general U.S. female population. The findings suggest the need for increased awareness and education on protective measures and modifiable risk factors within the orthopedic |
|--|--|--|--|--------------|----------------------------------------------------|------------------------------------------------------------------------------------------------------------------------------------------------------------------------|-----------------------------------------------------------------------------------------------------------------------------------------------------------------|--|---------------------------------------------------------------------------------------------------------------------------------------------------------------------------------------------------------------------------------|

|  |  |  |  |  |                                                                                                                                                            |  |  |           |
|--|--|--|--|--|------------------------------------------------------------------------------------------------------------------------------------------------------------|--|--|-----------|
|  |  |  |  |  | fluoroscopy use Standardized prevalence ratios (SPRs) were calculated to compare cancer prevalence among the study population with the general U.S. female |  |  | community |
|--|--|--|--|--|------------------------------------------------------------------------------------------------------------------------------------------------------------|--|--|-----------|

|                          |                                                                                                                                       |                        |                                         |                                                                                                                                                                                       |                                                                                                                                                                                                                                     |                                                                                                                                                                                                                                                    |                                                                                                                                                                                                                                                                                                                     |              |                                                                                                                                                                                                                                                                                                                 |
|--------------------------|---------------------------------------------------------------------------------------------------------------------------------------|------------------------|-----------------------------------------|---------------------------------------------------------------------------------------------------------------------------------------------------------------------------------------|-------------------------------------------------------------------------------------------------------------------------------------------------------------------------------------------------------------------------------------|----------------------------------------------------------------------------------------------------------------------------------------------------------------------------------------------------------------------------------------------------|---------------------------------------------------------------------------------------------------------------------------------------------------------------------------------------------------------------------------------------------------------------------------------------------------------------------|--------------|-----------------------------------------------------------------------------------------------------------------------------------------------------------------------------------------------------------------------------------------------------------------------------------------------------------------|
|                          |                                                                                                                                       |                        |                                         |                                                                                                                                                                                       |                                                                                                                                                                                                                                     | popula<br>tion                                                                                                                                                                                                                                     |                                                                                                                                                                                                                                                                                                                     |              |                                                                                                                                                                                                                                                                                                                 |
| 73. Saxena,<br>2019 (29) | Does the Proportion<br>of Women in<br>Orthopaedic<br>Leadership Roles<br>Reflect the Gender<br>Composition of<br>Specialty Societies? | Not<br>specif<br>ified | cross-<br>section<br>al<br>analysi<br>s | The study<br>focuses<br>on<br>orthopaed<br>ic<br>societies,<br>specificall<br>y<br>examining<br>the<br>gender<br>compositi<br>on of their<br>members<br>and<br>boards of<br>directors | The<br>study<br>includ<br>ed 23<br>orthop<br>aedic<br>societi<br>es,<br>althou<br>gh<br>two<br>societi<br>es<br>were<br>exclu<br>ded<br>from<br>the<br>statisti<br>cal<br>analy<br>sis<br>due to<br>their<br>specifi<br>c<br>missio | The<br>study<br>used a<br>regres<br>sion<br>analysi<br>s to<br>compa<br>re the<br>percen<br>tage of<br>wome<br>n in<br>orthop<br>aedic<br>societi<br>es with<br>the<br>percen<br>tage of<br>wome<br>n on<br>their<br>boards<br>of<br>directo<br>rs | The<br>primary<br>factor<br>examined<br>was the<br>correlation<br>between<br>the<br>percentage<br>of women<br>in the<br>societies<br>and the<br>percentage<br>of women<br>on the<br>boards of<br>directors<br>The<br>presence<br>of junior<br>board<br>member<br>positions<br>was also<br>considered<br>as a factor | - Leadership | There is a<br>strong<br>correlation<br>between<br>the<br>percentag<br>e of<br>women in<br>a society<br>and the<br>percentag<br>e of<br>women on<br>the<br>society's<br>board of<br>directors<br>( $r^2 =$<br>.2333; $p =$<br>.0495)<br>The<br>presence<br>of junior<br>board<br>members<br>did not<br>correlate |

|  |  |  |  |  |                               |                                                                                                                                                          |  |  |                                                    |
|--|--|--|--|--|-------------------------------|----------------------------------------------------------------------------------------------------------------------------------------------------------|--|--|----------------------------------------------------|
|  |  |  |  |  | ns<br>related to<br>diversity | A t-test was used to compare the presence of junior members on the board with the percentage of women on the board<br>Data was collected from the execut |  |  | with an increased percentage of women on the board |
|--|--|--|--|--|-------------------------------|----------------------------------------------------------------------------------------------------------------------------------------------------------|--|--|----------------------------------------------------|

|                |                                                                          |               |                        |                                                                                                            |                                                                                      |                                                                                              |                                                                                                                                                          |         |                                                                                                                                               |
|----------------|--------------------------------------------------------------------------|---------------|------------------------|------------------------------------------------------------------------------------------------------------|--------------------------------------------------------------------------------------|----------------------------------------------------------------------------------------------|----------------------------------------------------------------------------------------------------------------------------------------------------------|---------|-----------------------------------------------------------------------------------------------------------------------------------------------|
|                |                                                                          |               |                        |                                                                                                            |                                                                                      | ive directors of the societies and supplemented by reviewing society bylaws                  |                                                                                                                                                          |         |                                                                                                                                               |
| 74. Chou, 2010 | Prevalence of Cancer in Female Orthopaedic Surgeons in the United States | United States | cross-sectional survey | The population targeted in this study includes practicing female orthopaedic surgeons in the United States | The sample size of the study is 499 practicing female orthopaedic surgeons who respo | The study used a survey method, where potentially eligible AAOS fellows were mailed a survey | The study focused on factors such as age, years in practice, and the prevalence of cancer, particularly breast cancer, among female orthopaedic surgeons | -Cancer | The study concluded that there is a significant increased prevalence of cancer, particularly breast cancer, among practicing female orthopaed |

|  |  |  |  |  |                   |                                                                                                                                                                  |  |  |                                                                                                                                                                                                               |
|--|--|--|--|--|-------------------|------------------------------------------------------------------------------------------------------------------------------------------------------------------|--|--|---------------------------------------------------------------------------------------------------------------------------------------------------------------------------------------------------------------|
|  |  |  |  |  | ned to the survey | along with a cover letter and a return-addressed envelope. A follow-up survey was sent to increase response rates The survey included questions about age, years |  |  | ic surgeons compared to the general U.S. female population . The standardized prevalence ratio indicated a 1.9-fold increase in cancer prevalence overall and a 2.9-fold increase in breast cancer prevalence |
|--|--|--|--|--|-------------------|------------------------------------------------------------------------------------------------------------------------------------------------------------------|--|--|---------------------------------------------------------------------------------------------------------------------------------------------------------------------------------------------------------------|

|                     |                                                                                                                   |              |                               |                                                            |                                            |                                                                                                                        |                                                              |                                                                             |                                                                |
|---------------------|-------------------------------------------------------------------------------------------------------------------|--------------|-------------------------------|------------------------------------------------------------|--------------------------------------------|------------------------------------------------------------------------------------------------------------------------|--------------------------------------------------------------|-----------------------------------------------------------------------------|----------------------------------------------------------------|
|                     |                                                                                                                   |              |                               |                                                            |                                            | in practice, type of practice, and use of certain medical tools and materials. It also inquired about cancer diagnoses |                                                              |                                                                             |                                                                |
| 75. Thiart, 2023 48 | Operating in the margins: Women's lived experience of training and working in orthopaedic surgery in South Africa | South Africa | Descriptive qualitative study | Women orthopaedic surgeons in South Africa, including both | 16 women orthopaedic surgeons participants | Data were collected through focus group                                                                                | Dynamic working environments and the work of transformation. | - Work life balance<br>- Mental health impacts<br>- Bias.<br>- Microaggress | The study highlights the dynamic process in which both men and |

|  |  |  |  |                                                                               |                                  |                                                                                                                                                                           |                                                                                                                                                                                  |                           |                                                                                                                                                                                                                                                           |
|--|--|--|--|-------------------------------------------------------------------------------|----------------------------------|---------------------------------------------------------------------------------------------------------------------------------------------------------------------------|----------------------------------------------------------------------------------------------------------------------------------------------------------------------------------|---------------------------|-----------------------------------------------------------------------------------------------------------------------------------------------------------------------------------------------------------------------------------------------------------|
|  |  |  |  | <p>those in training (registrars) and qualified specialists (consultants)</p> | <p>participated in the study</p> | <p>discussions conducted online via Zoom</p> <p>Purposive and snowball sampling methods were used to recruit participants</p> <p>The study was grounded in phenomenol</p> | <p>Negotiating competing roles of mother and surgeon. Belonging, exclusion, and internalised sexism. Gaslighting and silencing. Acts of resistance, agency, and pushing back</p> | <p>sexual harassment/</p> | <p>women contribute to co-creating, reproducing, and challenging practices that make medicine more inclusive. It identifies structures, practices, attitudes, and ideologies that may promote or impede the inclusion of women in orthopaedic surgery</p> |
|--|--|--|--|-------------------------------------------------------------------------------|----------------------------------|---------------------------------------------------------------------------------------------------------------------------------------------------------------------------|----------------------------------------------------------------------------------------------------------------------------------------------------------------------------------|---------------------------|-----------------------------------------------------------------------------------------------------------------------------------------------------------------------------------------------------------------------------------------------------------|

|                      |                                                                                               |               |                     |                                                                                               |                                                                       |                                                                           |                                                                                                                    |            |                                                                                                                             |
|----------------------|-----------------------------------------------------------------------------------------------|---------------|---------------------|-----------------------------------------------------------------------------------------------|-----------------------------------------------------------------------|---------------------------------------------------------------------------|--------------------------------------------------------------------------------------------------------------------|------------|-----------------------------------------------------------------------------------------------------------------------------|
|                      |                                                                                               |               |                     |                                                                                               |                                                                       | ogy and used thematic analysis following a data-driven inductive approach |                                                                                                                    |            |                                                                                                                             |
| 76. Chapman, 2018 52 | Profiles of Practicing Female Orthopaedists Caring for Medicare Patients in the United States | United States | observational study | The study focuses on practicing female orthopaedic surgeons in the United States who care for | The study analyzed data from 1,269 female orthopaedic surgeons out of | The study utilized Medicare billing data from 2012 to 2014 to identify    | Gender differences in practice characteristics, such as relocation for practice, distance from medical school, and | -Equal pay | There are significant differences between female and male orthopaedic surgeons in terms of subspecialty choices, education, |

|  |  |  |  |                           |                                                      |                                                                                                                                                           |                                                                                                                                                                             |                                                                                                                                                                                                                                                |
|--|--|--|--|---------------------------|------------------------------------------------------|-----------------------------------------------------------------------------------------------------------------------------------------------------------|-----------------------------------------------------------------------------------------------------------------------------------------------------------------------------|------------------------------------------------------------------------------------------------------------------------------------------------------------------------------------------------------------------------------------------------|
|  |  |  |  | <p>Medicare patients.</p> | <p>a total cohort of 23,992 orthopaedic surgeons</p> | <p>practicing orthopaedic surgeons. It involved analyzing demographic s, medical training, practice characteristics, case volume, specialization, and</p> | <p>subspecialty choices. Differences in billing practices and attrition rates between male and female surgeons. The influence of medical school ranking on career paths</p> | <p>billing practices, and attrition rates. Despite an increase in the number of female orthopaedic surgeons, gender disparities persist within the specialty. The study highlights the need for further research to understand and address</p> |
|--|--|--|--|---------------------------|------------------------------------------------------|-----------------------------------------------------------------------------------------------------------------------------------------------------------|-----------------------------------------------------------------------------------------------------------------------------------------------------------------------------|------------------------------------------------------------------------------------------------------------------------------------------------------------------------------------------------------------------------------------------------|

|                |                                                                                    |               |                                  |                                                  |                                              |                                                                                                               |                                                                    |            |                                                                 |
|----------------|------------------------------------------------------------------------------------|---------------|----------------------------------|--------------------------------------------------|----------------------------------------------|---------------------------------------------------------------------------------------------------------------|--------------------------------------------------------------------|------------|-----------------------------------------------------------------|
|                |                                                                                    |               |                                  |                                                  |                                              | procedure profiles. Representative Current Procedural Terminology (CPT) codes were used for each subspecialty |                                                                    |            | these disparities                                               |
| 77. Chou, 2022 | Increased Prevalence of Breast and All-cause Cancer in Female Orthopaedic Surgeons | United States | survey-based observational study | Female orthopaedic surgeons in the United States | 672 female orthopaedic surgeons participated | Surveys were distributed to female orthopaedic surgeons                                                       | Demographic factors: age, race/ethnicity, body mass index, smoking | -Radiation | The study found an increased prevalence of breast and all-cause |

|  |  |  |  |  |                                                                                                                                                                                               |                                                                                                                                                                                                                                                                              |                                                                                                                                                                                                                                           |
|--|--|--|--|--|-----------------------------------------------------------------------------------------------------------------------------------------------------------------------------------------------|------------------------------------------------------------------------------------------------------------------------------------------------------------------------------------------------------------------------------------------------------------------------------|-------------------------------------------------------------------------------------------------------------------------------------------------------------------------------------------------------------------------------------------|
|  |  |  |  |  | <p>pated in the study</p> <p>ns through national orthopaedic specialty societies. The survey collected demographic information, professional history, and self-reported cancer diagnoses.</p> | <p>history, menstrual and reproductive history, and hormone use. Professional factors: subspecialty, years in practice, use of fluoroscopy, PMMA use, lead protection, dosimeter use, and radiation exposure risk training. Family history of cancer was also considered</p> | <p>cancer among female orthopaedic surgeons compared to the general US female population.</p> <p>The standardized prevalence ratio for breast cancer was significantly higher among the surgeons, indicating a potential occupational</p> |
|--|--|--|--|--|-----------------------------------------------------------------------------------------------------------------------------------------------------------------------------------------------|------------------------------------------------------------------------------------------------------------------------------------------------------------------------------------------------------------------------------------------------------------------------------|-------------------------------------------------------------------------------------------------------------------------------------------------------------------------------------------------------------------------------------------|

|  |  |  |  |  |  |                                                                                                                                                            |  |  |                 |
|--|--|--|--|--|--|------------------------------------------------------------------------------------------------------------------------------------------------------------|--|--|-----------------|
|  |  |  |  |  |  | The study used standardized prevalence ratios (SPRs) and 95% confidence intervals (CIs) to compare cancer prevalence with the general US female population |  |  | nal risk factor |
|--|--|--|--|--|--|------------------------------------------------------------------------------------------------------------------------------------------------------------|--|--|-----------------|

|                   |                                                                                                                                                     |               |                     |                                                                                            |                                                                                  |                                                                                                                                                              |                                                                                                                                                                                                                           |                  |                                                                                                                                                                                                                                                    |
|-------------------|-----------------------------------------------------------------------------------------------------------------------------------------------------|---------------|---------------------|--------------------------------------------------------------------------------------------|----------------------------------------------------------------------------------|--------------------------------------------------------------------------------------------------------------------------------------------------------------|---------------------------------------------------------------------------------------------------------------------------------------------------------------------------------------------------------------------------|------------------|----------------------------------------------------------------------------------------------------------------------------------------------------------------------------------------------------------------------------------------------------|
| 78. Rodgers, 2022 | How Does Orthopaedic Surgeon Gender Representation Vary by Career Stage, Regional Distribution, and Practice Size? A Large- Database Medicare Study | United States | retrospective study | The study focuses on orthopaedic surgeons in the United States who serve Medicare patients | The study includes data on 19,221 orthopaedic surgeons, of which 1,019 are women | The study utilized demographic, billing, and practice characteristics data from the Medicare Physician and Other Supplier Public Use File and Physician Comp | Gender representation across different career stages and geographic distributions. Differences in rural-urban practice settings and group practice sizes. Years in practice as a continuous variable influencing outcomes | - Representation | There is a significant gender disparity, with one woman for every 20 men orthopaedic surgeons serving Medicare patients in the U.S. Women are more likely to work in larger group practices compared to men Both male and female surgeons predomin |
|-------------------|-----------------------------------------------------------------------------------------------------------------------------------------------------|---------------|---------------------|--------------------------------------------------------------------------------------------|----------------------------------------------------------------------------------|--------------------------------------------------------------------------------------------------------------------------------------------------------------|---------------------------------------------------------------------------------------------------------------------------------------------------------------------------------------------------------------------------|------------------|----------------------------------------------------------------------------------------------------------------------------------------------------------------------------------------------------------------------------------------------------|

|  |  |  |  |  |                                                                                                                                                            |  |                                                                                                                                                                                                                                                  |
|--|--|--|--|--|------------------------------------------------------------------------------------------------------------------------------------------------------------|--|--------------------------------------------------------------------------------------------------------------------------------------------------------------------------------------------------------------------------------------------------|
|  |  |  |  |  | are national databases Descriptive statistics and multiple linear regression were used to analyze the data, adjusting for years in practice The study also |  | antly practice in urban settings, with no significant difference in rural-urban distribution when controlling for years in practice The study highlights the need for gender-based equity and inclusion efforts in the orthopaedic surgery field |
|--|--|--|--|--|------------------------------------------------------------------------------------------------------------------------------------------------------------|--|--------------------------------------------------------------------------------------------------------------------------------------------------------------------------------------------------------------------------------------------------|

|                      |                                                                                         |               |                    |                                                                                  |                                                        |                                                                                                              |                                                                             |                    |                                                                               |
|----------------------|-----------------------------------------------------------------------------------------|---------------|--------------------|----------------------------------------------------------------------------------|--------------------------------------------------------|--------------------------------------------------------------------------------------------------------------|-----------------------------------------------------------------------------|--------------------|-------------------------------------------------------------------------------|
|                      |                                                                                         |               |                    |                                                                                  |                                                        | examined regional representation and group practice size by grouping surgeons into 5-year practice intervals |                                                                             |                    |                                                                               |
| 79. Mason, 2023 (47) | Perceptions of Racial and Gender Microaggressions in an Academic Orthopaedic Department | United States | survey-based study | The study population includes attendings, fellows, and residents who were active | A total of 84 individuals were invited to participate, | The study used a 34-question survey, which was a                                                             | The study investigated the frequency of experienced or perceived microaggre | - Microaggressions | Female participants, non-White participants, and Hispanic minorities reported |

|  |  |  |  |                                                                                                     |                                                                         |                                                                                                                                                                        |                                                                                                               |  |                                                                                                                                                                                                                                                                  |
|--|--|--|--|-----------------------------------------------------------------------------------------------------|-------------------------------------------------------------------------|------------------------------------------------------------------------------------------------------------------------------------------------------------------------|---------------------------------------------------------------------------------------------------------------|--|------------------------------------------------------------------------------------------------------------------------------------------------------------------------------------------------------------------------------------------------------------------|
|  |  |  |  | <p>members of the orthopaedics department at the University of Miami Miller School of Medicine.</p> | <p>and 54 completed the survey, resulting in a response rate of 64%</p> | <p>modified version of the validated Racial and Ethnic Minorities Scale and Daily Life Experiences Survey. The survey was distributed via institutional email, and</p> | <p>ssions based on race, sex, and ethnicity, and their effects on career decisions in orthopaedic surgery</p> |  | <p>experiencing a higher frequency of microaggressions. These experiences may act as barriers to recruitment and retention of underrepresented minorities in orthopaedic surgery. The study highlights the need for further investigation into the impact of</p> |
|--|--|--|--|-----------------------------------------------------------------------------------------------------|-------------------------------------------------------------------------|------------------------------------------------------------------------------------------------------------------------------------------------------------------------|---------------------------------------------------------------------------------------------------------------|--|------------------------------------------------------------------------------------------------------------------------------------------------------------------------------------------------------------------------------------------------------------------|

|  |  |  |  |  |  |                                                                                                                                                     |  |  |                                                                                                      |
|--|--|--|--|--|--|-----------------------------------------------------------------------------------------------------------------------------------------------------|--|--|------------------------------------------------------------------------------------------------------|
|  |  |  |  |  |  | participation was voluntary and anonymous Subgroup analyses were performed by stratifying responses by race, sex, Hispanic ethnicity, career level, |  |  | microaggressions on career decisions and goals for women and persons of color in orthopaedic surgery |
|--|--|--|--|--|--|-----------------------------------------------------------------------------------------------------------------------------------------------------|--|--|------------------------------------------------------------------------------------------------------|

|                     |                                                                |               |                             |                                                                               |                                                                                                           |                                                                                                                                              |                                                                                                                                                                                                                                                       |                                                   |                                                                                                                                                                                                                        |
|---------------------|----------------------------------------------------------------|---------------|-----------------------------|-------------------------------------------------------------------------------|-----------------------------------------------------------------------------------------------------------|----------------------------------------------------------------------------------------------------------------------------------------------|-------------------------------------------------------------------------------------------------------------------------------------------------------------------------------------------------------------------------------------------------------|---------------------------------------------------|------------------------------------------------------------------------------------------------------------------------------------------------------------------------------------------------------------------------|
|                     |                                                                |               |                             |                                                                               |                                                                                                           | and age                                                                                                                                      |                                                                                                                                                                                                                                                       |                                                   |                                                                                                                                                                                                                        |
| 80. Hill, 2013 (24) | Residents' Perceptions of Sex Diversity in Orthopaedic Surgery | Not mentioned | survey-based research study | The population targeted in this study includes orthopaedic surgery residents. | The survey was sent to 2,629 orthopaedic surgery residents, and 529 responded, making the sample size 529 | A seven-question survey was distributed via email to orthopaedic residents by the American Academy of Orthopaedic Surgeons. The survey aimed | The study identified several factors influencing the decision to enter orthopaedic surgery, including the presence of a role model, perceived happiness of orthopaedic faculty, and clinical clerkship experience. Differences in perceptions between | - Mentorship<br>- Academic/research opportunities | The study concluded that orthopaedic surgery has been less successful in recruiting women compared to general surgery. It suggested that increased exposure to orthopaedic content during medical school and increased |

|  |  |  |  |  |                                                                                                                                               |                                                                                                                                                          |  |                                                                                        |
|--|--|--|--|--|-----------------------------------------------------------------------------------------------------------------------------------------------|----------------------------------------------------------------------------------------------------------------------------------------------------------|--|----------------------------------------------------------------------------------------|
|  |  |  |  |  | to identify factors influencing the choice of orthopaedic surgery as a specialty and to compare perceptions between male and female residents | men and women were noted, such as the importance of having a role model of the same sex or ethnicity and the perceived physical demands of the specialty |  | female mentorship could help recruit more women into the orthopaedic surgery workforce |
|--|--|--|--|--|-----------------------------------------------------------------------------------------------------------------------------------------------|----------------------------------------------------------------------------------------------------------------------------------------------------------|--|----------------------------------------------------------------------------------------|

|                 |                                                                       |               |                   |                                                                                   |                                                                                 |                                                                                                                                                          |                                                                                                                                                                                                                                                  |                                   |                                                                                                                                                                                                                                                     |
|-----------------|-----------------------------------------------------------------------|---------------|-------------------|-----------------------------------------------------------------------------------|---------------------------------------------------------------------------------|----------------------------------------------------------------------------------------------------------------------------------------------------------|--------------------------------------------------------------------------------------------------------------------------------------------------------------------------------------------------------------------------------------------------|-----------------------------------|-----------------------------------------------------------------------------------------------------------------------------------------------------------------------------------------------------------------------------------------------------|
| 81. Terle, 2023 | Diversity-Related Positions in Orthopaedic Surgery Residency Programs | United States | descriptive study | The study focuses on orthopaedic surgery residency programs in the United States. | The study evaluates 193 ACGME-accredited orthopaedic surgery residency programs | The study uses data collected from residency program websites, analyzing factors such as program location, type (university or community-based), allopat | The study examines the presence of diversity, equity, and inclusion (DEI) statements and faculty roles within residency programs. It also considers program size, type, and geographic location as factors influencing the presence of DEI roles | - Academic/research opportunities | The study concludes that less than half of the orthopaedic surgery residency programs advocate for DEI on their websites, and fewer than 25% have a DEI faculty position. It suggests that increasing DEI roles may enhance the number of women and |
|-----------------|-----------------------------------------------------------------------|---------------|-------------------|-----------------------------------------------------------------------------------|---------------------------------------------------------------------------------|----------------------------------------------------------------------------------------------------------------------------------------------------------|--------------------------------------------------------------------------------------------------------------------------------------------------------------------------------------------------------------------------------------------------|-----------------------------------|-----------------------------------------------------------------------------------------------------------------------------------------------------------------------------------------------------------------------------------------------------|

|  |  |  |  |  |  |                                                                                                                                                        |  |  |                                                                             |
|--|--|--|--|--|--|--------------------------------------------------------------------------------------------------------------------------------------------------------|--|--|-----------------------------------------------------------------------------|
|  |  |  |  |  |  | hic or osteopathic recognition, number of faculty, number of residents per year, diversity-related statements, and diversity-focused faculty positions |  |  | Underrepresented in Medicine (URiM) applicants pursuing orthopaedic surgery |
|--|--|--|--|--|--|--------------------------------------------------------------------------------------------------------------------------------------------------------|--|--|-----------------------------------------------------------------------------|

|                     |                                               |               |                     |                                                                                                                      |                                                                                                                                             |                                                                                                                                                                      |                                                                                                                                                                                                                                               |                                            |                                                                                                                                                                                                                                                    |
|---------------------|-----------------------------------------------|---------------|---------------------|----------------------------------------------------------------------------------------------------------------------|---------------------------------------------------------------------------------------------------------------------------------------------|----------------------------------------------------------------------------------------------------------------------------------------------------------------------|-----------------------------------------------------------------------------------------------------------------------------------------------------------------------------------------------------------------------------------------------|--------------------------------------------|----------------------------------------------------------------------------------------------------------------------------------------------------------------------------------------------------------------------------------------------------|
| 82. BLAKEMORE, 2003 | Women in Surgical Residency Training Programs | United States | observational study | The study focuses on medical residents in various surgical fields, with a particular emphasis on orthopaedic surgery | The study does not specify a sample size in terms of the number of individuals but analyzes data spanning from 1970 to 2001, excluding 1975 | The study uses linear regression models to analyze changes in the percentage of women in orthopaedic residencies compared to other surgical fields. It also compares | The study examines factors such as the recruitment practices in orthopaedic surgery, perceptions of the field, and the compatibility of the career with family life. It also considers the overall increase in women entering medical schools | -Recruitment efforts<br>-Work-life balance | The study concludes that orthopaedic surgery has not been as successful as other surgical fields in recruiting female trainees. Despite the increase in women entering medical schools, the percentage of women in orthopaedic residencies has not |
|---------------------|-----------------------------------------------|---------------|---------------------|----------------------------------------------------------------------------------------------------------------------|---------------------------------------------------------------------------------------------------------------------------------------------|----------------------------------------------------------------------------------------------------------------------------------------------------------------------|-----------------------------------------------------------------------------------------------------------------------------------------------------------------------------------------------------------------------------------------------|--------------------------------------------|----------------------------------------------------------------------------------------------------------------------------------------------------------------------------------------------------------------------------------------------------|

|                 |                                                                      |               |                        |                                                                                      |                                                             |                                                                                             |                                                                                         |             |                                                                                                                                                                            |
|-----------------|----------------------------------------------------------------------|---------------|------------------------|--------------------------------------------------------------------------------------|-------------------------------------------------------------|---------------------------------------------------------------------------------------------|-----------------------------------------------------------------------------------------|-------------|----------------------------------------------------------------------------------------------------------------------------------------------------------------------------|
|                 |                                                                      |               |                        |                                                                                      |                                                             | res the proportion of women entering medical school with those entering orthopaedic surgery |                                                                                         |             | significantly changed over the past two decades. The study suggests that active intervention is necessary to improve gender representation in orthopaedic surgery training |
| 83. Robin, 2021 | Disparities Among Industry's Highly Compensated Orthopaedic Surgeons | United States | retrospective analysis | The study focuses on orthopaedic surgeons who are highly compensated by the industry | The study identified 1,025 physicians who met the inclusion | The study used publicly available information from the                                      | Gender, subspecialty fellowship training, and practice setting were analyzed as factors | -Equal pay. | There is a significant gender disparity among the top-compensated orthopaedic surgeons,                                                                                    |

|  |  |  |  |  |                                                           |                                                                                                                                                                  |                                                                                                                               |  |                                                                                                                                                                                                                                              |
|--|--|--|--|--|-----------------------------------------------------------|------------------------------------------------------------------------------------------------------------------------------------------------------------------|-------------------------------------------------------------------------------------------------------------------------------|--|----------------------------------------------------------------------------------------------------------------------------------------------------------------------------------------------------------------------------------------------|
|  |  |  |  |  | on criteria, representing 347 unique orthopaedic surgeons | CMS to identify the top 25 orthopaedic surgeons with the highest compensation from each of the 10 largest orthopaedic companies from 2013 to 2017<br>Statistical | influencing compensation<br>The study also examined the distribution of payments among different companies and subspecialties |  | with less than 1% being female<br>Sports medicine specialists received the highest mean compensation, while spine specialists had the highest mean compensation per physician<br>Additional studies are recommended to further explore these |
|--|--|--|--|--|-----------------------------------------------------------|------------------------------------------------------------------------------------------------------------------------------------------------------------------|-------------------------------------------------------------------------------------------------------------------------------|--|----------------------------------------------------------------------------------------------------------------------------------------------------------------------------------------------------------------------------------------------|

|                       |                                                          |               |                     |                                                   |                                  |                                                                                                                            |                                                          |            |                                                        |
|-----------------------|----------------------------------------------------------|---------------|---------------------|---------------------------------------------------|----------------------------------|----------------------------------------------------------------------------------------------------------------------------|----------------------------------------------------------|------------|--------------------------------------------------------|
|                       |                                                          |               |                     |                                                   |                                  | analyses were conducted using SPSS version 26, with ANOVA and post hoc testing using the Tukey HSD for significant results |                                                          |            | disparities and promote gender equality in the field   |
| 84. Valone, 2016 (41) | Breast Radiation Exposure in Female Orthopaedic Surgeons | Not specified | observational study | The study focuses on female orthopaedic surgeons, | The specific sample size for the | Anthropomorphic torso and pelvic                                                                                           | Factors associated with higher breast radiation exposure | -Radiation | Breast radiation exposure is higher in a C-arm lateral |

|  |  |  |  |                                                                                                                                    |                                                                                                                         |                                                                                                                                                                |                                                                                                                                                                                         |  |                                                                                                                                                                                                                                                                    |
|--|--|--|--|------------------------------------------------------------------------------------------------------------------------------------|-------------------------------------------------------------------------------------------------------------------------|----------------------------------------------------------------------------------------------------------------------------------------------------------------|-----------------------------------------------------------------------------------------------------------------------------------------------------------------------------------------|--|--------------------------------------------------------------------------------------------------------------------------------------------------------------------------------------------------------------------------------------------------------------------|
|  |  |  |  | <p>with a comparison to the general U.S. female population and other surgical specialties like plastic surgeons and urologists</p> | <p>phantom study is not mentioned, but the referenced study by Chou et al. involved 505 female orthopaedic surgeons</p> | <p>phantoms were used to simulate a female surgeon and a patient, respectively, in an operating room setting. Dosimeters were placed on the upper quadrant</p> | <p>include apron size and type, surgeon position, and C-arm position. The study also considered the orientation of the silicon diode detector and the size of the protective aprons</p> |  | <p>projection compared to an anteroposterior projection. The upper outer quadrant (UOQ) of the breast receives higher radiation exposure compared to the lower inner quadrant (LIQ). Properly sized lead protection and distancing the axilla from the patient</p> |
|--|--|--|--|------------------------------------------------------------------------------------------------------------------------------------|-------------------------------------------------------------------------------------------------------------------------|----------------------------------------------------------------------------------------------------------------------------------------------------------------|-----------------------------------------------------------------------------------------------------------------------------------------------------------------------------------------|--|--------------------------------------------------------------------------------------------------------------------------------------------------------------------------------------------------------------------------------------------------------------------|

|  |  |  |  |  |                                                                                                                                                        |  |  |                                              |
|--|--|--|--|--|--------------------------------------------------------------------------------------------------------------------------------------------------------|--|--|----------------------------------------------|
|  |  |  |  |  | (UOQ) and lower inner quadrant (LIQ) of the breast to measure radiation exposure during fluoroscopy. Various apron sizes and types, surgeon positions, |  |  | and x-ray tube may reduce radiation exposure |
|--|--|--|--|--|--------------------------------------------------------------------------------------------------------------------------------------------------------|--|--|----------------------------------------------|

|                   |                                                                    |               |              |                                                                                                                      |                                                                  |                                                                              |                                                                                                                         |                                                      |                                                                                                                                |
|-------------------|--------------------------------------------------------------------|---------------|--------------|----------------------------------------------------------------------------------------------------------------------|------------------------------------------------------------------|------------------------------------------------------------------------------|-------------------------------------------------------------------------------------------------------------------------|------------------------------------------------------|--------------------------------------------------------------------------------------------------------------------------------|
|                   |                                                                    |               |              |                                                                                                                      |                                                                  | and C-arm positions were tested to assess their impact on radiation exposure |                                                                                                                         |                                                      |                                                                                                                                |
| 85. Ruse, 2022 66 | Pregnancy in Orthopaedic Residents: Peripartum Barriers Identified | United States | Survey study | Female orthopaedic surgeons, including current residents and those who had completed training in an ACGME-accredited | 328 women responded to the survey and met the inclusion criteria | A 63-item self-administered survey was used to evaluate multiple aspects     | Concerns about balancing clinical and maternal duties (67%)<br>Fear of how the resident would be viewed by those in the | - Work-life balance<br>- Fertility/parenthood issues | The study highlights significant barriers to pursuing pregnancy during orthopaedic residency, which may deter qualified female |

|  |  |  |  |                                                |                                                                                                                                                                               |                                                                                                                             |                                                                                                                                                           |
|--|--|--|--|------------------------------------------------|-------------------------------------------------------------------------------------------------------------------------------------------------------------------------------|-----------------------------------------------------------------------------------------------------------------------------|-----------------------------------------------------------------------------------------------------------------------------------------------------------|
|  |  |  |  | <p>US orthopaedic surgery training program</p> | <p>s of childbearing during orthopaedic surgery residency</p> <p>The survey was distributed electronically through email to residency program coordinators and a targeted</p> | <p>program (60%)</p> <p>Inability to ensure optimal prenatal and postpartum care due to an unpredictable schedule (38%)</p> | <p>applicants from the field.</p> <p>If supportive policies are implemented, more women might be encouraged to pursue a career in orthopaedic surgery</p> |
|--|--|--|--|------------------------------------------------|-------------------------------------------------------------------------------------------------------------------------------------------------------------------------------|-----------------------------------------------------------------------------------------------------------------------------|-----------------------------------------------------------------------------------------------------------------------------------------------------------|

|  |  |  |  |  |                                                                                                                                                                                                                                                                   |  |  |  |
|--|--|--|--|--|-------------------------------------------------------------------------------------------------------------------------------------------------------------------------------------------------------------------------------------------------------------------|--|--|--|
|  |  |  |  |  | d<br>Faceb<br>ook<br>group,<br>"The<br>Wome<br>n of<br>Orthop<br>edics"<br>Multiv<br>ariate<br>logistic<br>regres<br>sion<br>was<br>used<br>to<br>determ<br>ine<br>indepe<br>ndent<br>factors<br>associ<br>ated<br>with<br>profes<br>sional<br>dissati<br>sfactio |  |  |  |
|--|--|--|--|--|-------------------------------------------------------------------------------------------------------------------------------------------------------------------------------------------------------------------------------------------------------------------|--|--|--|

|               |                                                                                                        |               |                   |                                                                                                      |               |                                                                                                                             |                                                                                                                                                                                                           |                                                       |                                                                                                                                                                              |
|---------------|--------------------------------------------------------------------------------------------------------|---------------|-------------------|------------------------------------------------------------------------------------------------------|---------------|-----------------------------------------------------------------------------------------------------------------------------|-----------------------------------------------------------------------------------------------------------------------------------------------------------------------------------------------------------|-------------------------------------------------------|------------------------------------------------------------------------------------------------------------------------------------------------------------------------------|
|               |                                                                                                        |               |                   |                                                                                                      |               | n related to pregnancy during residency                                                                                     |                                                                                                                                                                                                           |                                                       |                                                                                                                                                                              |
| 86. Day, 2010 | Diversity Based on Race, Ethnicity, and Sex Between Academic Orthopaedic Surgery and Other Specialties | United States | comparative study | the study examines medical students, orthopaedic residents, orthopaedic faculty, and full professors | not specified | The study uses a comparative analysis approach, utilizing public registries to determine the composition of the orthopaedic | The main factors analyzed in the study are race, ethnicity, and sex. The study specifically looks at the representation of African-Americans, Hispanics/Latinos, Asian-Americans, and women in orthopaedi | - Representation<br>- Academic/research opportunities | The study concludes that orthopaedic surgery lags behind general surgery and other fields in terms of minority and female representation. It suggests that efforts should be |

|  |  |  |  |  |  |                                                                                                                                                                            |                                    |  |                                                                                                                     |
|--|--|--|--|--|--|----------------------------------------------------------------------------------------------------------------------------------------------------------------------------|------------------------------------|--|---------------------------------------------------------------------------------------------------------------------|
|  |  |  |  |  |  | workforce by race, ethnicity, and sex. It compares the diversity of orthopaedic residents and faculty with that in five other specialties and examines the applicant pools | c surgery compared to other fields |  | made to recruit more diverse residents and faculty, given the similar capabilities and qualifications of applicants |
|--|--|--|--|--|--|----------------------------------------------------------------------------------------------------------------------------------------------------------------------------|------------------------------------|--|---------------------------------------------------------------------------------------------------------------------|

|                       |                                                                                                 |               |                        |                                                                                           |                                                                                      |                                                                                                   |                                                                                                                                               |                      |                                                                                                                                                              |
|-----------------------|-------------------------------------------------------------------------------------------------|---------------|------------------------|-------------------------------------------------------------------------------------------|--------------------------------------------------------------------------------------|---------------------------------------------------------------------------------------------------|-----------------------------------------------------------------------------------------------------------------------------------------------|----------------------|--------------------------------------------------------------------------------------------------------------------------------------------------------------|
|                       |                                                                                                 |               |                        |                                                                                           |                                                                                      | for orthopaedic and general surgery residencies                                                   |                                                                                                                                               |                      |                                                                                                                                                              |
| 87. Pinpin, 2023 (13) | Exponential Growth in Female Residency Applicants in Orthopaedic Surgery Over the Past 15 Years | Not specified | observational analysis | The study focuses on medical students applying to orthopaedic surgery residency programs. | The exact sample size is not specified, but the study covers data from 2007 to 2022. | Data was collected from the AAMC ERAS database from 2007 to 2022. The study calculated the annual | The study examined the percentage of female applicants to orthopaedic surgery residency programs and the annual changes in these percentages. | -Recruitment effort. | There has been a significant increase in the percentage of female applicants to orthopaedic surgery, from 11.8% in 2007 to 23.0% in 2022. The study predicts |

|  |  |  |  |  |  |                                                                                                                                                                                         |  |                                                                                                                                                                                                                                                             |
|--|--|--|--|--|--|-----------------------------------------------------------------------------------------------------------------------------------------------------------------------------------------|--|-------------------------------------------------------------------------------------------------------------------------------------------------------------------------------------------------------------------------------------------------------------|
|  |  |  |  |  |  | <p>percentage of female applicants and the annual change in percentage. Regression analysis was used to calculate the best-fit trendline and extrapolate future trends using Micros</p> |  | <p>that if current trends continue, gender parity (36.3% female applicants) could be reached by 2038. The findings suggest that initiatives to improve gender diversity in orthopaedic surgery are having a positive impact, although the field remains</p> |
|--|--|--|--|--|--|-----------------------------------------------------------------------------------------------------------------------------------------------------------------------------------------|--|-------------------------------------------------------------------------------------------------------------------------------------------------------------------------------------------------------------------------------------------------------------|

|                    |                                                                                    |               |                      |                                                                                                                                             |              |                                                                                                                       |                                                                                                                                                                                                  |                                                        |                                                                                                                                                                                             |
|--------------------|------------------------------------------------------------------------------------|---------------|----------------------|---------------------------------------------------------------------------------------------------------------------------------------------|--------------|-----------------------------------------------------------------------------------------------------------------------|--------------------------------------------------------------------------------------------------------------------------------------------------------------------------------------------------|--------------------------------------------------------|---------------------------------------------------------------------------------------------------------------------------------------------------------------------------------------------|
|                    |                                                                                    |               |                      |                                                                                                                                             |              | oft<br>Excel                                                                                                          |                                                                                                                                                                                                  |                                                        | the least<br>gender-<br>diverse<br>among<br>surgical<br>specialties                                                                                                                         |
| 88. Chambers, 2018 | Women in Orthopaedic Surgery Population Trends in Trainees and Practicing Surgeons | United States | descriptive analysis | The study focuses on female orthopaedic surgery residents, academic faculty, and members of orthopaedic subspecialty and research societies | Not detailed | The study utilized publicly available data from the AAMC and the Accreditation Council for Graduate Medical Education | The study examines factors such as the percentage of female residents in orthopaedic surgery, the representation of women in academic faculty positions, and membership in orthopaedic societies | - Representation.<br>- Academic/research opportunities | The study concludes that orthopaedic surgery has a slow increase in the number of female residents and academic faculty compared to other specialties. It highlights the need for increased |

|                    |                                                                                          |        |                    |                                                  |                                     |                                                                                                                                |                                                   |                                 |                                                                                                       |
|--------------------|------------------------------------------------------------------------------------------|--------|--------------------|--------------------------------------------------|-------------------------------------|--------------------------------------------------------------------------------------------------------------------------------|---------------------------------------------------|---------------------------------|-------------------------------------------------------------------------------------------------------|
|                    |                                                                                          |        |                    |                                                  |                                     | (ACGME) for analysis. It also involved direct contact with subspecialty and research societies for membership demographic data |                                                   |                                 | exposure of medical students to orthopaedics and female mentors to attract top graduates to the field |
| 89. Hiemstra, 2023 | Rates of Burnout in Female Orthopaedic Surgeons Correlate with Barriers to Gender Equity | Canada | survey-based study | The study focused on female orthopaedic surgeons | The survey was sent to 330 eligible | An electronic survey was used,                                                                                                 | The study examined the correlation between career | -Mental health impacts<br>-Bias | The study concluded that half of the female orthopaedic                                               |

|  |  |  |  |                                                                       |                                                                                                    |                                                                                                                                                                                |                                                                                                                                                                                                                                                |                                                                                                                                                                                                                                           |
|--|--|--|--|-----------------------------------------------------------------------|----------------------------------------------------------------------------------------------------|--------------------------------------------------------------------------------------------------------------------------------------------------------------------------------|------------------------------------------------------------------------------------------------------------------------------------------------------------------------------------------------------------------------------------------------|-------------------------------------------------------------------------------------------------------------------------------------------------------------------------------------------------------------------------------------------|
|  |  |  |  | <p>in Canada, including those in training, practicing, or retired</p> | <p>e participants, and responses were received from 218, resulting in a response rate of 66.1%</p> | <p>which included demographic questions, the Gender Bias Scale (GBS) questionnaire, and questions about career burnout and job satisfaction. The survey data were analyzed</p> | <p>burnout and barriers to gender equity, as identified by the GBS higher-order domains and lower-order barriers. Factors such as male privilege, devaluation, and disproportionate constraints were significantly correlated with burnout</p> | <p>surgeons reported symptoms of career burnout. Significant relationships were found between burnout and barriers to gender equity, highlighting the need to address systemic biases and dismantle gender barriers to reduce burnout</p> |
|--|--|--|--|-----------------------------------------------------------------------|----------------------------------------------------------------------------------------------------|--------------------------------------------------------------------------------------------------------------------------------------------------------------------------------|------------------------------------------------------------------------------------------------------------------------------------------------------------------------------------------------------------------------------------------------|-------------------------------------------------------------------------------------------------------------------------------------------------------------------------------------------------------------------------------------------|

|  |  |  |  |  |                                                                                                                                                                                                                         |  |  |  |
|--|--|--|--|--|-------------------------------------------------------------------------------------------------------------------------------------------------------------------------------------------------------------------------|--|--|--|
|  |  |  |  |  | ed<br>using<br>statistical<br>methods<br>such<br>as the<br>Pearson<br>r<br>correlation<br>coefficient<br>and<br>Spearman<br>rank<br>correlation<br>coefficient<br>to<br>evaluate<br>relationships<br>among<br>variables |  |  |  |
|--|--|--|--|--|-------------------------------------------------------------------------------------------------------------------------------------------------------------------------------------------------------------------------|--|--|--|

|                      |                                                                                                                                                    |                |                        |                                                                           |                                                                                                      |                                                                                                                                                                   |                                                                                                                                                                                                                                       |                  |                                                                                                                                                                                                                                                                             |
|----------------------|----------------------------------------------------------------------------------------------------------------------------------------------------|----------------|------------------------|---------------------------------------------------------------------------|------------------------------------------------------------------------------------------------------|-------------------------------------------------------------------------------------------------------------------------------------------------------------------|---------------------------------------------------------------------------------------------------------------------------------------------------------------------------------------------------------------------------------------|------------------|-----------------------------------------------------------------------------------------------------------------------------------------------------------------------------------------------------------------------------------------------------------------------------|
| 90. Acuna, 2021 (12) | How Long Will It Take to Reach Gender Parity in Orthopaedic Surgery in the United States? An Analysis of the National Provider Identifier Registry | United States. | observational analysis | The study focuses on practicing orthopaedic surgeons in the United States | The study analyzed a cohort of 31,296 practicing orthopaedic surgeons, of whom 8% (2,363) were women | The study utilized a univariate linear regression analysis to evaluate trends in the annual proportions of women who are active orthopaedic surgeons based on NPI | The study considered the growth rates of women orthopaedic surgeons across geographic regions and subspecialties. It also examined the national growth rate and projected future gender parity based on current trends representative | - Representation | The study concluded that achieving gender parity with the overall medical profession (36.3% women) is projected to take 217 years, reaching parity by the year 2236. Achieving parity with the overall US population (50.8% women) is projected to take 326 years, reaching |
|----------------------|----------------------------------------------------------------------------------------------------------------------------------------------------|----------------|------------------------|---------------------------------------------------------------------------|------------------------------------------------------------------------------------------------------|-------------------------------------------------------------------------------------------------------------------------------------------------------------------|---------------------------------------------------------------------------------------------------------------------------------------------------------------------------------------------------------------------------------------|------------------|-----------------------------------------------------------------------------------------------------------------------------------------------------------------------------------------------------------------------------------------------------------------------------|

|              |                                                                                                    |               |                        |                                                      |                   |                                                                                                                        |                                                    |                  |                                                                                                                                                                                                                 |
|--------------|----------------------------------------------------------------------------------------------------|---------------|------------------------|------------------------------------------------------|-------------------|------------------------------------------------------------------------------------------------------------------------|----------------------------------------------------|------------------|-----------------------------------------------------------------------------------------------------------------------------------------------------------------------------------------------------------------|
|              |                                                                                                    |               |                        |                                                      |                   | <p>enumeration dates</p> <p>Gender parity projections were calculated using the Holt-Winters forecasting algorithm</p> |                                                    |                  | <p>parity by the year 2354</p> <p>The study highlights the slow growth in the proportion of women in orthopaedic surgery and underscores the need for targeted efforts to close the gender gap more rapidly</p> |
| 91.cho, 2023 | Match Rates Among Underrepresented Minority and Female Applicants to Orthopaedic Surgery Residency | United States | Retrospective analyses | Applicants to orthopaedic surgery residency programs | 12,111 applicants | Data were collected from the                                                                                           | Demographic variables including sex and underrepre | - Representation | The study found that the overall match rate was 70%.                                                                                                                                                            |

|                                                         |  |  |                                             |  |                                                                                                                                                  |                                                                                                                 |  |                                                                                                                                                                                                                                                       |
|---------------------------------------------------------|--|--|---------------------------------------------|--|--------------------------------------------------------------------------------------------------------------------------------------------------|-----------------------------------------------------------------------------------------------------------------|--|-------------------------------------------------------------------------------------------------------------------------------------------------------------------------------------------------------------------------------------------------------|
| <p>Programs from 2011 to 2021<br/>How Are We Doing?</p> |  |  | <p>from US MD-granting medical schools.</p> |  | <p>Electronic Residency Application Service (ERAS), American Medical College Application Service (AMCAS), Graduation Questionnaire (GQ), and</p> | <p>sent minority (URM) status Academic factors such as AOA status and attendance at a top 40 medical school</p> |  | <p>However, the odds of matching decreased over the decade for all applicants, with specific decreases noted for non-URM male and female applicants. The odds for URM male applicants did not change significantly, while the odds for URM female</p> |
|---------------------------------------------------------|--|--|---------------------------------------------|--|--------------------------------------------------------------------------------------------------------------------------------------------------|-----------------------------------------------------------------------------------------------------------------|--|-------------------------------------------------------------------------------------------------------------------------------------------------------------------------------------------------------------------------------------------------------|

|  |  |  |  |  |                                                                                                                                                                                                                                                        |  |                                                                                                                                                                                                                                                                                                   |
|--|--|--|--|--|--------------------------------------------------------------------------------------------------------------------------------------------------------------------------------------------------------------------------------------------------------|--|---------------------------------------------------------------------------------------------------------------------------------------------------------------------------------------------------------------------------------------------------------------------------------------------------|
|  |  |  |  |  | <p>Liaison<br/>Committee<br/>on<br/>Medical<br/>Education<br/>(LCME)<br/>The<br/>study<br/>used<br/>multivariate<br/>logistic<br/>regression<br/>to<br/>analyze<br/>the<br/>likelihood<br/>of<br/>applicants<br/>matching<br/>into<br/>orthopaedic</p> |  | <p>applicants<br/>increased<br/>significantly<br/>The study<br/>highlights<br/>ongoing<br/>disparities<br/>in match<br/>rates for<br/>URM and<br/>female<br/>applicants<br/>, despite<br/>efforts to<br/>increase<br/>diversity<br/>in<br/>orthopaedic<br/>surgery<br/>residency<br/>programs</p> |
|--|--|--|--|--|--------------------------------------------------------------------------------------------------------------------------------------------------------------------------------------------------------------------------------------------------------|--|---------------------------------------------------------------------------------------------------------------------------------------------------------------------------------------------------------------------------------------------------------------------------------------------------|

|                        |                                                                                                          |     |        |                                                                   |                             |                                                                                                                                                                                                                |                                                               |                                     |                                                                          |
|------------------------|----------------------------------------------------------------------------------------------------------|-----|--------|-------------------------------------------------------------------|-----------------------------|----------------------------------------------------------------------------------------------------------------------------------------------------------------------------------------------------------------|---------------------------------------------------------------|-------------------------------------|--------------------------------------------------------------------------|
|                        |                                                                                                          |     |        |                                                                   |                             | surger<br>y,<br>control<br>ling for<br>factors<br>such<br>as the<br>numbe<br>r of<br>applic<br>ations,<br>top 40<br>medic<br>al<br>school<br>status,<br>AOA<br>status,<br>and<br>additio<br>nal<br>degree<br>s |                                                               |                                     |                                                                          |
| 92. Nemeth,<br>2020 62 | Program Directors'<br>Perception of<br>Pregnancy and<br>Parenthood in<br>Orthopedic Surgery<br>Residency | USA | Survey | All<br>program<br>direc-<br>tors<br>who were<br>members<br>of the | 61/15<br>1<br>resoin<br>ded | The<br>survey<br>was<br>dis-<br>tribute<br>d                                                                                                                                                                   | Pregnancy<br>and<br>Parenthoo<br>d for<br>Female<br>Residents | -Fertility/<br>parenthood<br>issues | This study<br>demonstr<br>ated that<br>although<br>orthopedic<br>surgery |

|  |  |  |  |                                                                               |                                                                                                                                                           |  |  |                                                                                                                                                                                                                                                    |
|--|--|--|--|-------------------------------------------------------------------------------|-----------------------------------------------------------------------------------------------------------------------------------------------------------|--|--|----------------------------------------------------------------------------------------------------------------------------------------------------------------------------------------------------------------------------------------------------|
|  |  |  |  | American Orthopaedic Association's Council of Orthopaedic Residency Directors | using REDCap electronic data capture tools (version 6.10.17; Vanderbilt University, 2016) in 2016. Email addresses for the program directors were collect |  |  | program directors did not indicate that pregnancy and parenthood have a more negative effect on female residents' work performance, well-being, and dedication to patient care, they did not perceive the effects of pregnancy and parenthood more |
|--|--|--|--|-------------------------------------------------------------------------------|-----------------------------------------------------------------------------------------------------------------------------------------------------------|--|--|----------------------------------------------------------------------------------------------------------------------------------------------------------------------------------------------------------------------------------------------------|

|  |  |  |  |  |  |                                                                                                                            |  |  |                                                                                                                                                                                                                                                |
|--|--|--|--|--|--|----------------------------------------------------------------------------------------------------------------------------|--|--|------------------------------------------------------------------------------------------------------------------------------------------------------------------------------------------------------------------------------------------------|
|  |  |  |  |  |  | <p>ed using publicly accessible information. A follow-up email was sent 2 weeks later to encourage more participation.</p> |  |  | <p>negatively for females concerning scholarly activities and the burden placed on fellow residents. To reduce the perceived burden on the program and encourage more accepting attitudes toward pregnancy and parenthood during training,</p> |
|--|--|--|--|--|--|----------------------------------------------------------------------------------------------------------------------------|--|--|------------------------------------------------------------------------------------------------------------------------------------------------------------------------------------------------------------------------------------------------|

|  |  |  |  |  |  |  |  |  |                                                                                                                                                                  |
|--|--|--|--|--|--|--|--|--|------------------------------------------------------------------------------------------------------------------------------------------------------------------|
|  |  |  |  |  |  |  |  |  | program directors can better work with residents to devise more accommodating schedules that are less disruptive to the program and to the resident's education. |
|--|--|--|--|--|--|--|--|--|------------------------------------------------------------------------------------------------------------------------------------------------------------------|
