# Supplementary material
Source: publisher site journal article supplement (https://www.dovepress.com/article/524482)
Supplement: Supplementary file 2 [file Appendix%202_1.pdf]

**Appendix 2 title: Summary of the Papers Discussing the Female Representation in Orthopedic Surgery Domain.**

| 1st author and the published year | Title                                                                                                   | Study type    | Challenges summary                                                                                                                                                                                                                                                                                                                                  |
|-----------------------------------|---------------------------------------------------------------------------------------------------------|---------------|-----------------------------------------------------------------------------------------------------------------------------------------------------------------------------------------------------------------------------------------------------------------------------------------------------------------------------------------------------|
| 1. Rodarte, 2023 (33)             | Other side of conflict: examining the challenges of female orthopedic surgeons in the workplace         | Survey Study  | <ul style="list-style-type: none"> <li>- Bias</li> <li>- Mentorship</li> <li>- Difficulties in networking</li> <li>- Work-life balance</li> <li>- Conflicts</li> <li>- Microaggression/ harassment .</li> <li>- Leadership</li> <li>- Mental health impacts</li> </ul>                                                                              |
| 2. Ponzio , 2022 67 *             | Discrepancies in Work-Family Integration Between Female and Male Orthopaedic Surgeons                   | Survey        | <ul style="list-style-type: none"> <li>- Mental health impact</li> <li>- Mentorship</li> </ul>                                                                                                                                                                                                                                                      |
| 3. Bowe, 2021 (9)                 | Evidence of specialty- specific gender disparities in resident recruitment and selection                | observational | Representation                                                                                                                                                                                                                                                                                                                                      |
| 4. Heest, 2012 (25)               | The Uneven Distribution of Women in Orthopaedic Surgery Resident Training Programs in the United States | Survey        | <ul style="list-style-type: none"> <li>- Career advancement opportunities.</li> <li>- Mentorship</li> <li>- Leadership.</li> <li>- Unequal pay</li> <li>- Mental health impacts</li> <li>- Bias</li> <li>- Work-Life Balance.</li> <li>- Career Advancement opportunities.</li> <li>- Microaggression/ Harassment.</li> <li>- Mentorship</li> </ul> |

|                                |                                                                                                                                             |                               |                                                                                                                                                                                                                |
|--------------------------------|---------------------------------------------------------------------------------------------------------------------------------------------|-------------------------------|----------------------------------------------------------------------------------------------------------------------------------------------------------------------------------------------------------------|
| 5. Yue, 2020                   | Academic Gender Disparity in Orthopedic Surgery in Canadian Universities.                                                                   | Cross-sectional study         | <ul style="list-style-type: none"> <li>- Microaggression/ Harassment</li> <li>- Leadership</li> <li>- Unequal pay</li> <li>- Work-Life Balance</li> <li>- Mentorship</li> </ul>                                |
| 6. Yin, 2023 (28)              | Has the Increase of Women in Surgical Training Programs Led to a Concomitant Increase in Female Leadership Positions? A 10-Year Analysis    | Retrospective analysis        | <ul style="list-style-type: none"> <li>-Leadership</li> <li>- Bias</li> <li>- Mentorship</li> <li>- Career advancement opportunities.</li> <li>- Unequal pay</li> <li>-Fertility/ parenthood issues</li> </ul> |
| 7. M. Gerull, 2020 (34)        | Are Women Proportionately Represented as Speakers at Orthopaedic Surgery Annual Meetings? A Cross-Sectional Analysis.                       | Cross-Sectional Analysis      | <ul style="list-style-type: none"> <li>- Academic/ research opportunities</li> <li>-Leadership roles</li> </ul>                                                                                                |
| 8. Ann E. Van Heest, 2016 (10) | A 5-Year Update on the Uneven Distribution of Women in Orthopaedic Surgery Residency Training Programs in the United States.                | Quantitative                  | <ul style="list-style-type: none"> <li>- Career advancement opportunities</li> <li>- Representation</li> <li>- Academic/ research opportunities</li> </ul>                                                     |
| 9. Hoof, 2020 (26)             | Gender-related Differences in Research Productivity, Position, and Advancement Among Academic Orthopaedic Faculty Within the United States. | Cross-sectional study         | <ul style="list-style-type: none"> <li>- Leadership Roles</li> <li>- Academic/ Research opportunities</li> <li>- Career advancement opportunities</li> <li>- Mentorship</li> </ul>                             |
| 10. Sutherland, 2021 (27)      | Gender, Race, Age, Allopathic Degree, Board Score, and Research Experience                                                                  | Retrospective Cohort Analysis | <ul style="list-style-type: none"> <li>- Mentorship</li> <li>- Bias.</li> </ul>                                                                                                                                |

|                           |                                                                                                                     |                       |                                                                                                                                                                                                        |
|---------------------------|---------------------------------------------------------------------------------------------------------------------|-----------------------|--------------------------------------------------------------------------------------------------------------------------------------------------------------------------------------------------------|
|                           | Among Applicants Matching to General and Orthopedic Surgery Residencies, 2015-2019                                  |                       | <ul style="list-style-type: none"> <li>- Representation.</li> <li>- Work-Life Balance.</li> </ul>                                                                                                      |
| 11. AlSamhori, 2023<br>57 | Factors influencing gender preference towards surgeons among Jordanian adults: an investigation of healthcare bias. | Survey                | <ul style="list-style-type: none"> <li>- Representation.</li> <li>- Biases.</li> </ul>                                                                                                                 |
| 12. Elkadi- 2022 (28)     | Trends in Medical Training and Leadership at Academic Orthopedic Programs.                                          | Cross-sectional       | <ul style="list-style-type: none"> <li>- Leadership roles.</li> <li>- Mentorship</li> <li>- Bias.</li> </ul>                                                                                           |
| 13. Tosi, 1998 (19)       | Ensuring the success of women in academic orthopedics                                                               | Delphi Panel & Survey | <ul style="list-style-type: none"> <li>- Mentorship</li> <li>- Bias.</li> <li>- Mental health impacts.</li> <li>- Unequal pay.</li> <li>- Work-life balance.</li> <li>- Recruitment effort.</li> </ul> |

|                                |                                                                                                                               |                     |                                                                                                              |
|--------------------------------|-------------------------------------------------------------------------------------------------------------------------------|---------------------|--------------------------------------------------------------------------------------------------------------|
|                                |                                                                                                                               |                     |                                                                                                              |
| 14. Laurie A. Hiemstra, 2022 3 | Experiences of Canadian Female Orthopaedic Surgeons in the Workplace: Defining the Barriers to Gender Equity.                 | Survey              | -Mental health impacts<br>- Career advancement opportunities<br>- Mentorship<br>-Microaggression/ Harassment |
| 15. Haruno 2023 (46)           | Racial and Sex Disparities in Resident Attrition in Orthopaedic Surgery.                                                      | Retrospective study | - Mentorship<br>- Mental health impact<br>-Microaggression/ harassment                                       |
| 16. Julian, 2023 (11)          | A 5-Year Update and Comparison of Factors Related to the Sex Diversity of Orthopaedic Residency Programs in the United States | Cross-sectional     | - Representation.<br>- Academic/ research opportunities..<br>-Fertility/ parenthood issues.                  |
| 17. Ramos, 2022 (30)           | Representation of Women on Editorial Boards of Medline-Indexed Spine, Neurosurgery, and Orthopedic Journals.                  | Cross-sectional     | - Academic/ research opportunities.<br>- Leadership roles.<br>- microaggression/ harassment.                 |
| 18. Kalpit N. Shah, 2020 (36)  | Orthopaedic Surgery Faculty: An Evaluation of Gender and Racial Diversity Compared with Other Specialties.                    | Retrospective       | - Academic/ research opportunities.<br>-Representation<br><br>- Career advancement opportunities             |
| 19. Errani, 2021               | Women and men in orthopaedics                                                                                                 | literature review   | - Work life balance<br>- Mentorship                                                                          |

|                         |                                                                                                                                          |                            |                                                                                                               |
|-------------------------|------------------------------------------------------------------------------------------------------------------------------------------|----------------------------|---------------------------------------------------------------------------------------------------------------|
| 20. Meadows, 2022       | Racial, Ethnic, and Gender Diversity in Academic Orthopaedic Surgery Leadership                                                          | Comparative analysis       | - Leadership                                                                                                  |
| 21. Xu, 2023 (14)       | The Importance of Perceived Barriers to Women Entering and Advancing in Orthopaedic Surgery in the US and Beyond                         | Survey-based study         | - Representation.<br>- Mentorship.<br>- Career advancement.<br>- Leadership.<br>- Fertility/parenthood issues |
| 22. Haffner, 2021       | What is the Trend in Representation of Women and Under- represented Minorities in Orthopaedic Surgery Residency?                         | Retrospective survey study | -Representation                                                                                               |
| 23. Daniels, 2018       | Gender Disparities Within US Army Orthopedic Surgery: A Preliminary Report                                                               | Observational study        | - Representation<br>- Bias<br>- Mentorship                                                                    |
| 24. Peterman, 2022 (16) | Gender Representation in Orthopaedic Surgery: A Geospatial Analysis From 2015 to 2022                                                    | Geospatial Analysis        | - Representation<br>- Mentorship                                                                              |
| 25. Okike, 2019 (15)    | Orthopaedic Faculty and Resident Sex Diversity Are Associated with the Orthopaedic Residency Application Rate of Female Medical Students | An observational study     | -Representation                                                                                               |
| 26. Ortega, 2021 (17)   | Diversity in orthopaedic trauma: where we are and where we need to be                                                                    | A survey-based research    | - Career advancement<br>- Leadership                                                                          |

|                      |                                                                                                                                         |                                                                                                   |                                                                                                                                                                  |
|----------------------|-----------------------------------------------------------------------------------------------------------------------------------------|---------------------------------------------------------------------------------------------------|------------------------------------------------------------------------------------------------------------------------------------------------------------------|
|                      |                                                                                                                                         |                                                                                                   | <ul style="list-style-type: none"> <li>- Academic/research opportunities</li> <li>- Representation</li> <li>- Work-life balance</li> <li>- Mentorship</li> </ul> |
| 27. Wang, 2023 (18)  | Trends in Race and Sex Representation Among Entering Orthopaedic Surgery Residents: A Continued Call for Active Diversification Efforts | A retrospective study that analyzes trends over a 20-year period.                                 | <ul style="list-style-type: none"> <li>- Representation</li> <li>- Recruitment efforts</li> </ul>                                                                |
| 28. Day, 2019        | BREAKING BARRIERS: A BRIEF OVERVIEW OF DIVERSITY IN ORTHOPEDIC SURGERY                                                                  | This is a review article that synthesizes existing literature on diversity in orthopedic surgery. | Representation                                                                                                                                                   |
| 29. Gebhardt, 2007   | Improving Diversity in Orthopaedic Residency Programs                                                                                   | Observational study                                                                               | <ul style="list-style-type: none"> <li>- Representation</li> <li>- Mentorship</li> </ul>                                                                         |
| 30. Heest, 2021 (38) | A 15-Year Report on the Uneven Distribution of Women in Orthopaedic Surgery Residency Training Programs in the United States            | Descriptive statistics analysis of residency training programs.                                   | <ul style="list-style-type: none"> <li>- Academic/research opportunities</li> <li>- Leadership</li> <li>- Mentorship</li> </ul>                                  |

|                       |                                                                                                                                                        |                                                                                                                                                      |                                                                                  |
|-----------------------|--------------------------------------------------------------------------------------------------------------------------------------------------------|------------------------------------------------------------------------------------------------------------------------------------------------------|----------------------------------------------------------------------------------|
| 31.Ojo, 2023          | A 25-Year Analysis of Diversity, Equity, and Inclusion Research in Orthopaedics Shows Majority Female Authorship and Increasing Gender Parity Research | scoping review that analyzes trends in diversity, equity, and inclusion (DEI) research within the field of orthopaedic surgery over a 25-year period | Representation                                                                   |
| 32.Albright, 2022     | Orthopaedic Society Leadership Diversity and Academic Participation                                                                                    | this research is a mixed-methods study, utilizing both surveys and publicly available data                                                           | - Academic/research opportunities<br><br>- Leadership                            |
| 33.Hiemstra, 2019 3   | Dissecting disparity: improvements towards gender parity in leadership and on the podium within the Canadian Orthopaedic Association                   | Descriptive study                                                                                                                                    | - Bias<br>- Mentorship                                                           |
| 34.Payares, 2023      | The Current State of Diversity in Orthopaedics                                                                                                         | Review/Analysis of existing data                                                                                                                     | Representation                                                                   |
| 35.Ramos, 2022        | Women in Leadership in State and Regional Orthopaedic Societies                                                                                        | based on survey data                                                                                                                                 | Leadership                                                                       |
| 36.Linscheid, 2020 65 | Women in academic surgery over the last four decades                                                                                                   | retrospective analysis                                                                                                                               | - Mentorship<br><br>- Work-life balance<br><br>- Academic/research opportunities |
| 37.Rajani, 2019       | Geographic Differences in Sex and Racial Distributions Among Orthopaedic                                                                               | secondary data analysis study.                                                                                                                       | -Representation                                                                  |

|                       |                                                                                                                                                     |                             |                                                                                                                           |
|-----------------------|-----------------------------------------------------------------------------------------------------------------------------------------------------|-----------------------------|---------------------------------------------------------------------------------------------------------------------------|
|                       | Surgery Residencies: Programs in the South Less Likely to Train Women and Minorities                                                                |                             |                                                                                                                           |
| 38. Incoll, 2019 (22) | Diversity in Orthopaedic Surgery: International Perspectives                                                                                        | qualitative assessment      | Representation                                                                                                            |
| 39. Tabie, 2023       | AOA Critical Issues: Perceptions on the State of Diversity, Equity, and Inclusion in Orthopaedic Surgery                                            | Cross-sectional survey      | - Mentorship<br>- Representation                                                                                          |
| 40. Summers, 2020 64  | Closing the Gender Gap: Barriers to Success for Recruitment and Retention of the Female Orthopaedic Surgery Applicant                               | Review                      | -Representation<br>-Recruitment effort<br><br>-Fertility/ Parenthood issues<br><br>-Work-life balance<br><br>- Mentorship |
| 41. Saxena, 2019 (29) | Does the Proportion of Women in Orthopaedic Leadership Roles Reflect the Gender Composition of Specialty Societies?                                 | cross-sectional analysis    | - Leadership                                                                                                              |
| 42. Rodgers, 2022     | How Does Orthopaedic Surgeon Gender Representation Vary by Career Stage, Regional Distribution, and Practice Size? A Large- Database Medicare Study | retrospective study         | Representation                                                                                                            |
| 43. Hill, 2013 (24)   | Residents' Perceptions of Sex Diversity in Orthopaedic Surgery                                                                                      | survey-based research study | - Mentorship<br><br>- Academic/research opportunities                                                                     |

|                      |                                                                                                                                                    |                        |                                                      |
|----------------------|----------------------------------------------------------------------------------------------------------------------------------------------------|------------------------|------------------------------------------------------|
| 44. Day, 2010        | Diversity Based on Race, Ethnicity, and Sex Between Academic Orthopaedic Surgery and Other Specialties                                             | comparative study      | -Representation<br>- Academic/research opportunities |
| 45. Chambers, 2018   | Women in Orthopaedic Surgery Population Trends in Trainees and Practicing Surgeons                                                                 | descriptive analysis   | -Representation<br>- Academic/research opportunities |
| 46. Acuna, 2021 (12) | How Long Will It Take to Reach Gender Parity in Orthopaedic Surgery in the United States? An Analysis of the National Provider Identifier Registry | observational analysis | Representation                                       |
| 47. cho, 2023        | Match Rates Among Underrepresented Minority and Female Applicants to Orthopaedic Surgery Residency Programs from 2011 to 2021<br>How Are We Doing? | Retrospective analysis | Representation                                       |
