# Supplementary material
Source: publisher site journal article supplement (https://www.dovepress.com/article/524482)
Supplement: Supplementary file 3 [file Appendix%203_1.pdf]

**Appendix 3 title: Summary of the Papers Discussing the Emotional Environment Domain.**

| 1st author and the published year | Title                                                                                                                                    | Study type             | Challenges summary                                                                                                                                                                                             |
|-----------------------------------|------------------------------------------------------------------------------------------------------------------------------------------|------------------------|----------------------------------------------------------------------------------------------------------------------------------------------------------------------------------------------------------------|
| 1. Fram, 2021 (42)                | Female Sex is Associated With Increased Reported Injury Rates and Difficulties With Use of Orthopedic Surgical Instruments.              | Survey                 | <ul style="list-style-type: none"> <li>- Bias</li> <li>- Technical difficulties</li> </ul>                                                                                                                     |
| 2. Sedani , 2024 (39)             | An overview of occupational injuries among female orthopaedic surgeons.                                                                  | Survey                 | <ul style="list-style-type: none"> <li>- Occupational injuries</li> <li>- Cancer/radiation</li> <li>- Mental health impacts</li> </ul>                                                                         |
| 3. Yin, 2023 (28)                 | Has the Increase of Women in Surgical Training Programs Led to a Concomitant Increase in Female Leadership Positions? A 10-Year Analysis | Retrospective analysis | <ul style="list-style-type: none"> <li>-Leadership</li> <li>- Bias</li> <li>- Mentorship</li> <li>- Career advancement opportunities.</li> <li>- Unequal pay</li> <li>-Fertility/ parenthood issues</li> </ul> |
| 4. Cohen-Rosenblum, 2022 (43)     | Repetitive Musculoskeletal Injuries: A Survey of Female Adult Reconstruction Surgeons.                                                   | Survey                 | <ul style="list-style-type: none"> <li>- Occupational injuries.</li> <li>- Parenthood/ fertility issues</li> </ul>                                                                                             |
| 5. Mulcahey, 2018 (45)            | The Perception of Pregnancy and Parenthood Among Female Orthopaedic Surgery Residents.                                                   | Survey                 | <ul style="list-style-type: none"> <li>- Fertility/ parenthood issues</li> <li>- Bias</li> <li>- Work-life balance</li> </ul>                                                                                  |
| 6. Phillips, 2014 51              | Does a surgical career affect a woman's childbearing and fertility? A report on pregnancy and fertility trends among female surgeons.    | Survey                 | <ul style="list-style-type: none"> <li>- Fertility/ parenthood issues</li> </ul>                                                                                                                               |

|                       |                                                                                                                  |                               |                                                                                                                                                                                         |
|-----------------------|------------------------------------------------------------------------------------------------------------------|-------------------------------|-----------------------------------------------------------------------------------------------------------------------------------------------------------------------------------------|
| 7. Kerluku, 2023 (44) | Assessing Gender Differences in Technical Skills and Confidence in Orthopaedic Surgery Residency Applicants      | Prospective                   | <ul style="list-style-type: none"> <li>- Technical difficulties</li> <li>- Biases</li> </ul>                                                                                            |
| 8. Xu, 2023 (14)      | The Importance of Perceived Barriers to Women Entering and Advancing in Orthopaedic Surgery in the US and Beyond | Survey-based study            | <ul style="list-style-type: none"> <li>- Representation.</li> <li>- Mentorship.</li> <li>- Career advancement.</li> <li>- Leadership.</li> <li>- Fertility/parenthood issues</li> </ul> |
| 9. Keene, 2011        | Occupational Hazards to the Pregnant Orthopaedic Surgeon                                                         | review of existing literature | <ul style="list-style-type: none"> <li>- Occupation injuries</li> <li>- Fertility/parenthood issues</li> </ul>                                                                          |
| 10. Compton, 2021 62  | Pregnancy and Parental Leave During Orthopaedic Surgery Residency                                                | Review article                | -Fertility/ parenthood issues                                                                                                                                                           |
| 11. Hamilton, 2012 61 | Childbearing and Pregnancy Characteristics of Female Orthopaedic Surgeons                                        | Cross-sectional survey        | -Fertility/ parenthood issues                                                                                                                                                           |
| 12. Chou , 2023 (40)  | Health Considerations for Female Orthopaedic Surgeons                                                            | Review and survey studies     | <ul style="list-style-type: none"> <li>- Radiation/ cancer</li> <li>- Fertility/parenthood issues</li> <li>- Occupational injuries</li> </ul>                                           |

|                       |                                                                                                                       |                                  |                                                                                                               |
|-----------------------|-----------------------------------------------------------------------------------------------------------------------|----------------------------------|---------------------------------------------------------------------------------------------------------------|
| 13. Summers, 2020 64  | Closing the Gender Gap: Barriers to Success for Recruitment and Retention of the Female Orthopaedic Surgery Applicant | Review                           | -Representation<br>-Recruitment effort<br>-Fertility/ Parenthood issues<br>-Work-life balance<br>- Mentorship |
| 14. Poon, 2020 60     | Does a Career in Orthopaedic Surgery Affect a Woman's Fertility?                                                      | survey-based research study      | -Fertility/ parenthood issues                                                                                 |
| 15. Chou, 2012        | Increased Breast Cancer Prevalence Among Female Orthopedic Surgeons                                                   | survey-based study               | -Radiation/ cancer risk                                                                                       |
| 16. Chou, 2010        | Prevalence of Cancer in Female Orthopaedic Surgeons in the United States                                              | cross-sectional survey           | -Cancer                                                                                                       |
| 17. Chou, 2022        | Increased Prevalence of Breast and All-cause Cancer in Female Orthopaedic Surgeons                                    | survey-based observational study | -Radiation                                                                                                    |
| 18. Valone, 2016 (41) | Breast Radiation Exposure in Female Orthopaedic Surgeons                                                              | observational study              | -Radiation                                                                                                    |
| 19. Ruse, 2022 66     | Pregnancy in Orthopaedic Residents: Peripartum Barriers Identified                                                    | Survey study                     | - Work-life balance<br>- Fertility/ parenthood issues                                                         |
| 20. Nemeth, 2020 62   | Program Directors' Perception of Pregnancy and Parenthood in Orthopedic Surgery Residency                             | Survey                           | Fertility/ parenthood issues                                                                                  |
