# Supplementary material
Source: publisher site journal article supplement (https://www.dovepress.com/article/524482)
Supplement: Supplementary file 4 [file Appendix%204_1.pdf]

**Appendix 4 Title: Summary of the Papers Discussing the Health Challenges domain.**

| 1st author and the published year | Title                                                                                                                       | Study type   | Challenges summary                                                                                                                                                                                                                                                                                                            |
|-----------------------------------|-----------------------------------------------------------------------------------------------------------------------------|--------------|-------------------------------------------------------------------------------------------------------------------------------------------------------------------------------------------------------------------------------------------------------------------------------------------------------------------------------|
| 1. Rodarte, 2023 (33)             | Other side of conflict: examining the challenges of female orthopedic surgeons in the workplace                             | Survey Study | <ul style="list-style-type: none"> <li>- Bias</li> <li>- Mentorship</li> <li>- Difficulties in networking</li> <li>- Work-life balance</li> <li>- Conflicts</li> <li>- Microaggression/ harassment.</li> <li>- Leadership</li> <li>- Mental health impacts</li> </ul>                                                         |
| 2. Ponzio , 2022 67 *             | Discrepancies in Work-Family Integration Between Female and Male Orthopaedic Surgeons                                       | Survey       | <ul style="list-style-type: none"> <li>- Mental health impact</li> <li>- Mentorship</li> </ul>                                                                                                                                                                                                                                |
| 3. Fram, 2021 (42)                | Female Sex is Associated With Increased Reported Injury Rates and Difficulties With Use of Orthopedic Surgical Instruments. | Survey       | <ul style="list-style-type: none"> <li>- Bias</li> <li>- Technical difficulties</li> </ul>                                                                                                                                                                                                                                    |
| 4. Sedani , 2024 (39)             | An overview of occupational injuries among female orthopaedic surgeons.                                                     | Survey       | <ul style="list-style-type: none"> <li>- Occupational injuries</li> <li>- Cancer/radiation</li> <li>- Mental health impacts</li> </ul>                                                                                                                                                                                        |
| 5. Heest, 2012 (25)               | The Uneven Distribution of Women in Orthopaedic Surgery Resident Training Programs in the United States                     | Survey       | <ul style="list-style-type: none"> <li>- Career advancement opportunities.</li> <li>- Mentorship</li> <li>- Leadership.</li> <li>- Unequal pay</li> <li>- Mental health impacts</li> <li>- Bias</li> <li>- Work-Life Balance.</li> <li>- Career Advancement opportunities.</li> <li>- Microaggression/ Harassment.</li> </ul> |

|                          |                                                                                                                                                               |                               |                                                                                                                                |
|--------------------------|---------------------------------------------------------------------------------------------------------------------------------------------------------------|-------------------------------|--------------------------------------------------------------------------------------------------------------------------------|
|                          |                                                                                                                                                               |                               | - Mentorship                                                                                                                   |
| 6. Yue, 2020             | Academic Gender Disparity in Orthopedic Surgery in Canadian Universities.                                                                                     | Cross-sectional study         | - Microaggression/ Harassment<br>- Leadership<br>- Unequal pay<br>- Work-Life Balance<br>- Mentorship                          |
| 7. Yin, 2023 (28)        | Has the Increase of Women in Surgical Training Programs Led to a Concomitant Increase in Female Leadership Positions? A 10-Year Analysis                      | Retrospective analyses        | -Leadership<br>- Bias<br>- Mentorship<br>- Career advancement opportunities.<br>- Unequal pay<br>-Fertility/ parenthood issues |
| 8. Mulcahey, 2018 (45)   | The Perception of Pregnancy and Parenthood Among Female Orthopaedic Surgery Residents.                                                                        | Survey                        | - Fertility/ parenthood issues<br>- Bias<br>- Work-life balance                                                                |
| 9. Sutherland, 2021 (27) | Gender, Race, Age, Allopathic Degree, Board Score, and Research Experience Among Applicants Matching to General and Orthopedic Surgery Residencies, 2015-2019 | Retrospective Cohort Analysis | - Mentorship<br>- Bias.<br>- Representation.<br>- Work-Life Balance.                                                           |
| 10. AlSamhori, 2023 57   | Factors influencing gender preference towards surgeons among Jordanian adults: an investigation of healthcare bias.                                           | Survey                        | - Representation.<br>- Biases.                                                                                                 |
| 11. Elkadi- 2022 (28)    | Trends in Medical Training and Leadership at Academic Orthopedic Programs.                                                                                    | Cross-sectional               | - Leadership roles.<br>- Mentorship<br>- Bias.                                                                                 |

|                                |                                                                                                               |                       |                                                                                                                                                                                                         |
|--------------------------------|---------------------------------------------------------------------------------------------------------------|-----------------------|---------------------------------------------------------------------------------------------------------------------------------------------------------------------------------------------------------|
| 12. Tosi, 1998 (19)            | Ensuring the success of women in academic orthopedics                                                         | Delphi Panel & Survey | <ul style="list-style-type: none"> <li>- Mentorship.</li> <li>- Bias.</li> <li>- Mental health impacts.</li> <li>- Unequal pay.</li> <li>- Work-life balance.</li> <li>- Recruitment effort.</li> </ul> |
| 13. Laurie A. Hiemstra, 2022 3 | Experiences of Canadian Female Orthopaedic Surgeons in the Workplace: Defining the Barriers to Gender Equity. | Survey                | <ul style="list-style-type: none"> <li>-Mental health impacts</li> <li>- Career advancement opportunities</li> <li>- Mentorship</li> <li>-Microaggression/ Harassment</li> </ul>                        |
| 14. Haruno 2023 (46)           | Racial and Sex Disparities in Resident Attrition in Orthopaedic Surgery.                                      | Retrospective study   | <ul style="list-style-type: none"> <li>- Mentorship</li> <li>- Mental health impact</li> <li>-Microaggression/ harassment</li> </ul>                                                                    |
| 15. Kerluku, 2023 (44)         | Assessing Gender Differences in Technical Skills and Confidence in Orthopaedic Surgery Residency Applicants   | Prospective           | <ul style="list-style-type: none"> <li>- Technical difficulties</li> <li>- Biases</li> </ul>                                                                                                            |
| 16. Ramos, 2022 (30)           | Representation of Women on Editorial Boards of Medline-Indexed Spine, Neurosurgery, and Orthopedic Journals.  | Cross-sectional       | <ul style="list-style-type: none"> <li>- Academic/ research opportunities.</li> <li>- Leadership roles.</li> <li>- microaggression/ harassment.</li> </ul>                                              |
| 17. Daniels, 2018              | Gender Disparities Within US Army Orthopedic Surgery: A Preliminary Report                                    | Observational study   | <ul style="list-style-type: none"> <li>- Representation</li> <li>- Bias</li> <li>- Mentorship</li> </ul>                                                                                                |

|                       |                                                                                                                                      |                               |                                                                                          |
|-----------------------|--------------------------------------------------------------------------------------------------------------------------------------|-------------------------------|------------------------------------------------------------------------------------------|
| 18. Sobel, 2023 (31)  | Interpersonal Interactions and Biases in Orthopaedic Surgery Residency: Do Experiences Differ Based on Gender?                       | survey study                  | - Academic/research opportunities.<br>- Work-life balance<br>-Mental health impacts      |
| 19. Hiemstra, 2019 3  | Dissecting disparity: improvements towards gender parity in leadership and on the podium within the Canadian Orthopaedic Association | Descriptive study             | - Bias<br>- Mentorship                                                                   |
| 20. <u>Hull, 2022</u> | Women in Surgery Events Alone do not Change Medical Student Perceptions of Gender Bias and Discrimination in Orthopaedic Surgery     | survey-based study            | - Bias                                                                                   |
| 21. Thiart, 2023 48   | Operating in the margins: Women's lived experience of training and working in orthopaedic surgery in South Africa                    | Descriptive qualitative study | - Work life balance<br>- Mental health impacts<br>-Bias.<br>- Microaggression/harassment |
| 22. Mason, 2023 (47)  | Perceptions of Racial and Gender Microaggressions in an Academic Orthopaedic Department                                              | survey-based study            | -Microaggressions                                                                        |
| 23. Hiemstra, 2023    | Rates of Burnout in Female Orthopaedic Surgeons Correlate with Barriers to Gender Equity                                             | survey-based study            | -Mental health impacts<br>-Bias                                                          |
